# Supplementary material for: Synthesis of surface snowfall rates and radar-observed storm structures in 10+ years of Northeast US winter storms
Source: Copernicus journal article supplement (doi:10.5194/egusphere-2025-6), 2025-01-17

# Supplementary Material

**Table S1:** List of storm days between 1996-2023 used in the analysis. Dates are in YYYYMMDD format.

|          |          |          |          |          |          |          |          |
|----------|----------|----------|----------|----------|----------|----------|----------|
| 19960102 | 19960103 | 19960104 | 19960107 | 19960108 | 19960109 | 19960110 | 19960112 |
| 19960129 | 19960131 | 19960202 | 19960203 | 19960208 | 19960211 | 19960214 | 19960216 |
| 19960217 | 19960302 | 19960305 | 19960306 | 19960307 | 19960308 | 19960329 | 19961126 |
| 19961127 | 19961206 | 19961231 | 19970109 | 19970110 | 19970111 | 19970124 | 19970127 |
| 19970128 | 19970131 | 19970204 | 19970208 | 19970214 | 19970216 | 19970217 | 19970303 |
| 19970306 | 19970308 | 19970310 | 19970314 | 19970331 | 19971114 | 19971116 | 19971122 |
| 19971210 | 19971223 | 19971227 | 19971229 | 19971230 | 19980116 | 19980118 | 19980119 |
| 19980123 | 19980124 | 19980125 | 19980224 | 19980314 | 19980322 | 19981224 | 19981229 |
| 19981230 | 19990108 | 19990109 | 19990112 | 19990113 | 19990114 | 19990115 | 19990128 |
| 19990129 | 19990208 | 19990212 | 19990225 | 19990306 | 19990307 | 19990314 | 19990315 |
| 19990322 | 20000113 | 20000120 | 20000121 | 20000125 | 20000126 | 20000130 | 20000131 |
| 20000203 | 20000214 | 20000218 | 20000219 | 20000317 | 20001214 | 20001219 | 20001220 |
| 20001222 | 20001230 | 20001231 | 20010105 | 20010106 | 20010108 | 20010109 | 20010119 |
| 20010121 | 20010127 | 20010202 | 20010205 | 20010206 | 20010208 | 20010222 | 20010223 |
| 20010225 | 20010301 | 20010302 | 20010304 | 20010305 | 20010306 | 20010309 | 20010310 |
| 20010326 | 20010330 | 20011208 | 20011209 | 20020106 | 20020107 | 20020117 | 20020119 |
| 20020121 | 20020131 | 20020211 | 20020318 | 20020320 | 20021116 | 20021117 | 20021118 |
| 20021127 | 20021202 | 20021205 | 20021206 | 20021211 | 20021212 | 20021216 | 20021225 |
| 20021226 | 20030102 | 20030103 | 20030104 | 20030105 | 20030106 | 20030107 | 20030108 |
| 20030109 | 20030111 | 20030126 | 20030127 | 20030129 | 20030202 | 20030207 | 20030210 |
| 20030212 | 20030216 | 20030217 | 20030218 | 20030306 | 20030313 | 20030330 | 20031205 |
| 20031206 | 20031207 | 20031214 | 20031215 | 20031217 | 20040102 | 20040112 | 20040113 |
| 20040114 | 20040115 | 20040118 | 20040126 | 20040127 | 20040128 | 20040203 | 20040206 |
| 20040207 | 20040222 | 20040308 | 20040316 | 20040317 | 20040318 | 20040319 | 20041112 |
| 20041113 | 20041206 | 20041220 | 20041226 | 20041227 | 20050105 | 20050106 | 20050108 |
| 20050111 | 20050112 | 20050116 | 20050117 | 20050119 | 20050120 | 20050122 | 20050123 |
| 20050124 | 20050126 | 20050204 | 20050210 | 20050211 | 20050220 | 20050221 | 20050224 |
| 20050225 | 20050228 | 20050301 | 20050302 | 20050308 | 20050309 | 20050311 | 20050312 |
| 20050323 | 20050324 | 20051124 | 20051204 | 20051206 | 20051209 | 20051216 | 20051231 |
| 20060101 | 20060103 | 20060105 | 20060114 | 20060115 | 20060123 | 20060125 | 20060211 |
| 20060212 | 20060225 | 20060226 | 20060302 | 20070119 | 20070122 | 20070128 | 20070202 |
| 20070213 | 20070214 | 20070222 | 20070223 | 20070225 | 20070226 | 20070227 | 20070307 |
| 20070316 | 20070317 | 20070319 | 20070324 | 20071118 | 20071119 | 20071202 | 20071203 |
| 20071205 | 20071213 | 20071216 | 20071220 | 20071227 | 20071230 | 20071231 | 20080101 |
| 20080114 | 20080115 | 20080117 | 20080127 | 20080207 | 20080209 | 20080210 | 20080212 |
| 20080213 | 20080222 | 20080226 | 20080229 | 20080301 | 20080315 | 20080328 | 20081206 |
| 20081207 | 20081211 | 20081216 | 20081217 | 20081219 | 20081220 | 20081221 | 20081231 |
| 20090107 | 20090108 | 20090110 | 20090111 | 20090115 | 20090118 | 20090119 | 20090128 |

|          |          |          |          |          |          |          |          |
|----------|----------|----------|----------|----------|----------|----------|----------|
| 20090203 | 20090218 | 20090219 | 20090220 | 20090222 | 20090301 | 20090302 | 20090309 |
| 20091205 | 20091209 | 20091219 | 20091220 | 20091228 | 20091231 | 20100101 | 20100102 |
| 20100103 | 20100108 | 20100117 | 20100118 | 20100119 | 20100128 | 20100202 | 20100203 |
| 20100205 | 20100206 | 20100209 | 20100210 | 20100216 | 20100223 | 20100224 | 20100225 |
| 20100226 | 20100227 | 20101213 | 20101214 | 20101220 | 20101226 | 20101227 | 20110107 |
| 20110108 | 20110111 | 20110112 | 20110118 | 20110119 | 20110121 | 20110125 | 20110126 |
| 20110127 | 20110201 | 20110202 | 20110208 | 20110220 | 20110221 | 20110225 | 20110227 |
| 20110307 | 20110321 | 20110323 | 20110324 | 20110331 | 20111027 | 20111029 | 20111030 |
| 20111207 | 20120112 | 20120116 | 20120117 | 20120119 | 20120120 | 20120121 | 20120224 |
| 20120229 | 20120301 | 20121107 | 20121108 | 20121127 | 20121221 | 20121222 | 20121225 |
| 20121226 | 20121227 | 20121229 | 20130116 | 20130121 | 20130125 | 20130128 | 20130208 |
| 20130209 | 20130216 | 20130217 | 20130224 | 20130227 | 20130307 | 20130308 | 20130318 |
| 20130319 | 20131112 | 20131126 | 20131206 | 20131208 | 20131210 | 20131214 | 20131215 |
| 20131217 | 20131224 | 20131226 | 20131229 | 20140102 | 20140103 | 20140110 | 20140118 |
| 20140121 | 20140122 | 20140125 | 20140129 | 20140203 | 20140205 | 20140209 | 20140213 |
| 20140214 | 20140215 | 20140218 | 20140219 | 20140313 | 20141114 | 20141126 | 20141127 |
| 20141209 | 20141210 | 20141211 | 20150103 | 20150106 | 20150109 | 20150112 | 20150124 |
| 20150126 | 20150127 | 20150130 | 20150131 | 20150201 | 20150202 | 20150205 | 20150208 |
| 20150209 | 20150212 | 20150214 | 20150215 | 20150217 | 20150218 | 20150219 | 20150221 |
| 20150222 | 20150225 | 20150301 | 20150303 | 20150305 | 20150315 | 20150320 | 20150321 |
| 20150328 | 20151229 | 20160112 | 20160117 | 20160118 | 20160122 | 20160123 | 20160205 |
| 20160208 | 20160209 | 20160210 | 20160215 | 20160321 | 20161027 | 20161119 | 20161120 |
| 20161205 | 20161212 | 20161217 | 20161229 | 20161230 | 20170106 | 20170107 | 20170114 |
| 20170118 | 20170124 | 20170131 | 20170201 | 20170207 | 20170209 | 20170211 | 20170212 |
| 20170213 | 20170215 | 20170216 | 20170310 | 20170313 | 20170314 | 20170315 | 20170331 |
| 20171209 | 20171212 | 20171213 | 20171214 | 20171215 | 20171222 | 20171225 | 20171230 |
| 20180104 | 20180113 | 20180116 | 20180117 | 20180130 | 20180201 | 20180204 | 20180207 |
| 20180217 | 20180218 | 20180222 | 20180302 | 20180307 | 20180308 | 20180309 | 20180312 |
| 20180313 | 20180314 | 20180321 | 20180322 | 20181115 | 20181116 | 20181119 | 20181120 |
| 20181127 | 20181213 | 20190109 | 20190119 | 20190120 | 20190129 | 20190130 | 20190212 |
| 20190218 | 20190220 | 20190221 | 20190227 | 20190228 | 20190301 | 20190302 | 20190303 |
| 20190304 | 20190310 | 20190322 | 20191112 | 20191201 | 20191202 | 20191203 | 20191206 |
| 20191211 | 20191217 | 20191218 | 20191230 | 20200116 | 20200118 | 20200119 | 20200202 |
| 20200206 | 20200207 | 20200209 | 20200213 | 20200218 | 20200323 | 20201030 | 20201205 |
| 20201209 | 20201216 | 20201217 | 20201220 | 20201225 | 20210101 | 20210102 | 20210103 |
| 20210126 | 20210127 | 20210131 | 20210201 | 20210202 | 20210203 | 20210207 | 20210209 |
| 20210211 | 20210218 | 20210219 | 20210222 | 20211126 | 20211128 | 20211208 | 20211218 |
| 20211219 | 20211224 | 20220107 | 20220116 | 20220117 | 20220124 | 20220128 | 20220129 |
| 20220204 | 20220213 | 20220214 | 20220225 | 20220309 | 20220312 | 20221115 | 20221211 |
| 20221215 | 20221216 | 20230106 | 20230116 | 20230120 | 20230122 | 20230123 | 20230125 |
| 20230222 | 20230223 | 20230225 | 20230227 | 20230228 | 20230303 | 20230304 | 20230311 |
| 20230314 |          |          |          |          |          |          |          |

## ***All available transects from NASA IMPACTS with snow to the surface***

In this section we present all 57 available transects from the 3 NASA IMPACTS deployment which have snow to the surface. For each transect we present the reflectivity, velocity, spectrum width, and LDR fields from the instrument with the shortest wavelength available (usually CRS, but occasionally HIWRAP Ku-band) and the reflectivity field from the instrument with the longest wavelength available (usually EXRAD, but occasionally HIWRAP Ka-band). We include snapshots of the NEXRAD regional maps to provide context for the transects. If available, we include the VAD winds on the EXRAD reflectivity transects and CFADs of wind speed and direction to summarize the wind patterns. Each transect is annotated with one or two vertical, dashed, black lines which annotates the approximate location where the enhanced reflectivity features are in the regional maps. The time of the regional maps and transects as well as the field and instrument plotted is labeled above each sub-figure.

2020



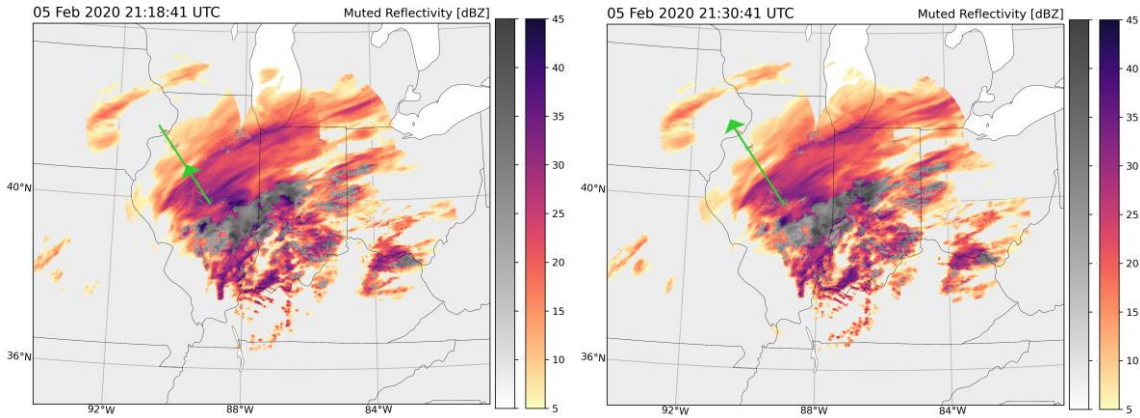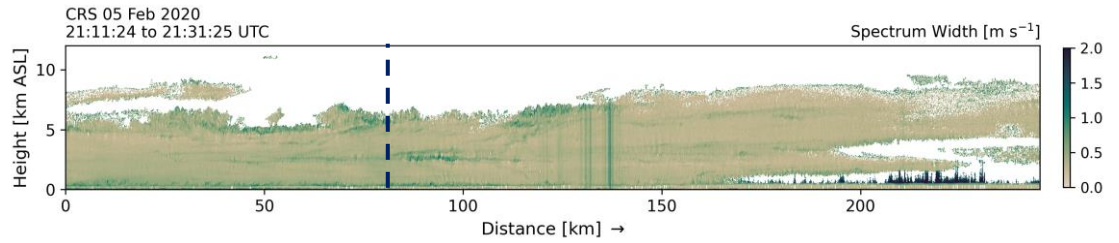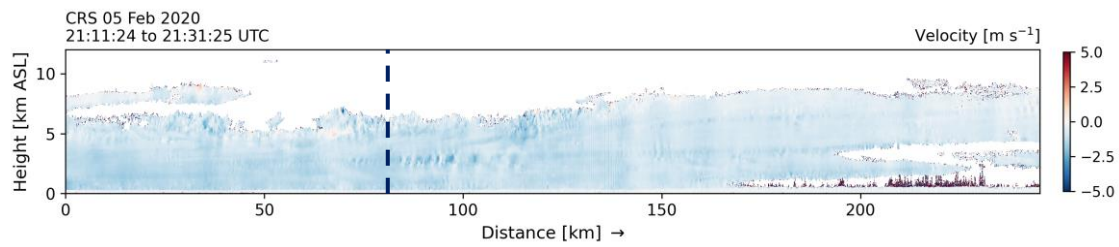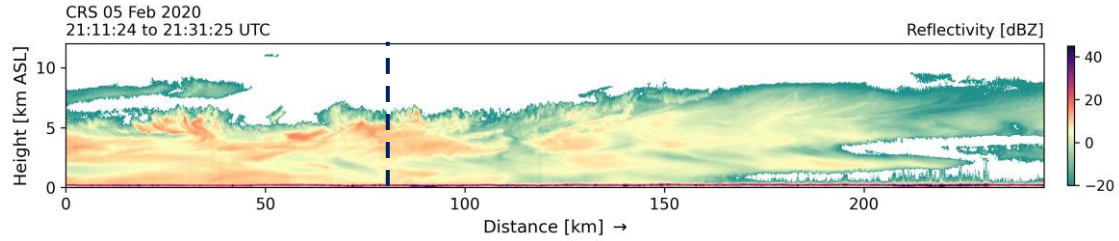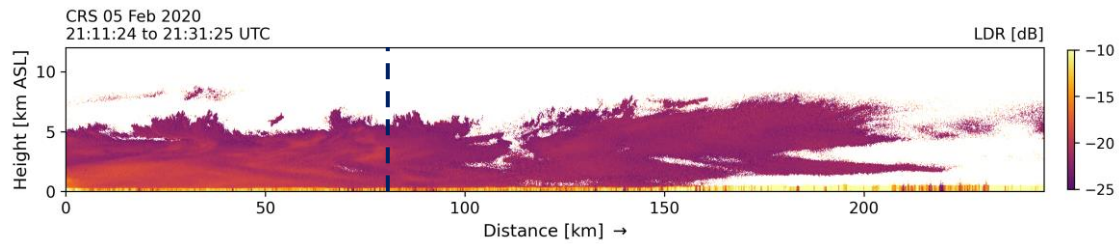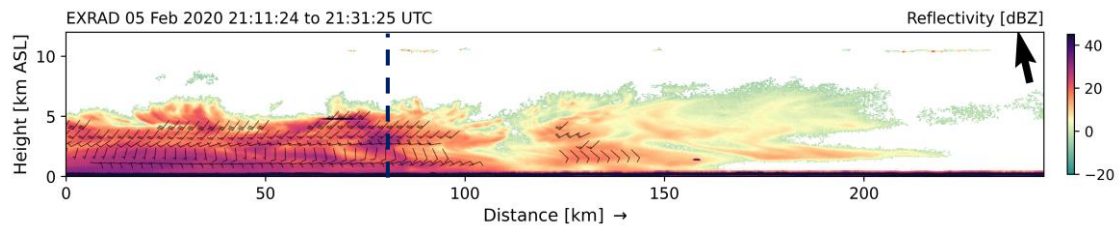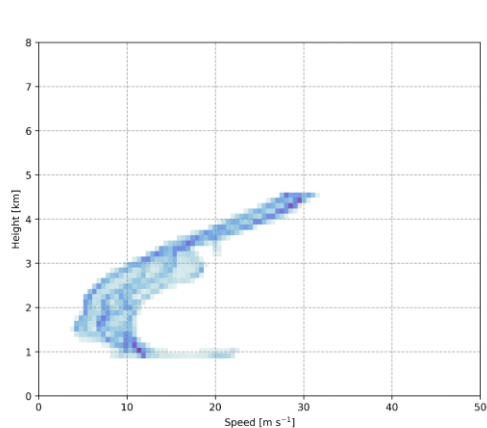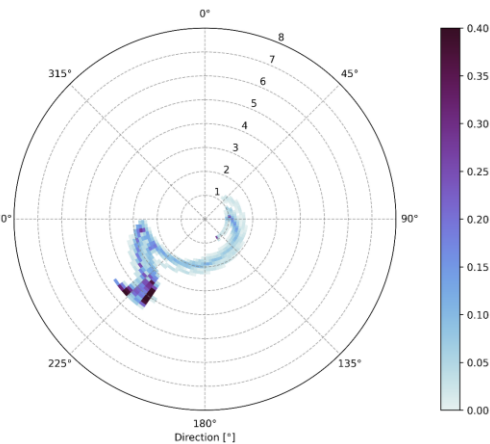

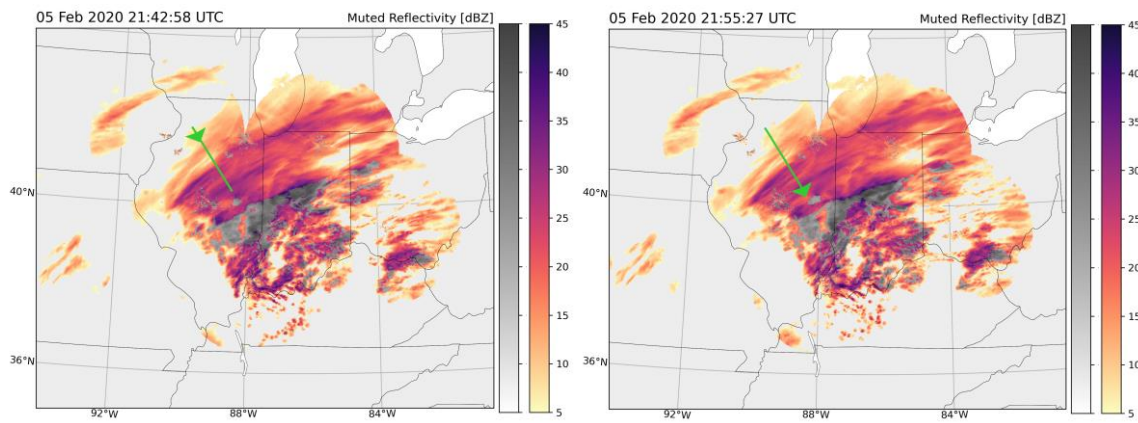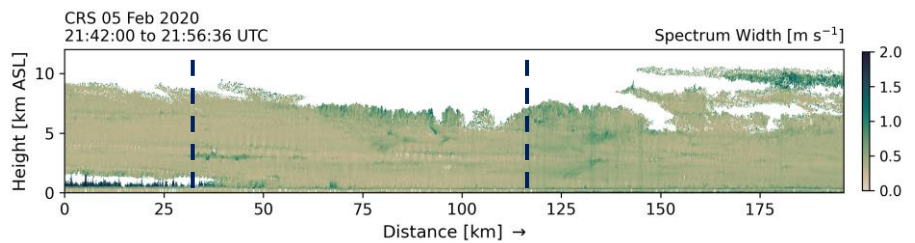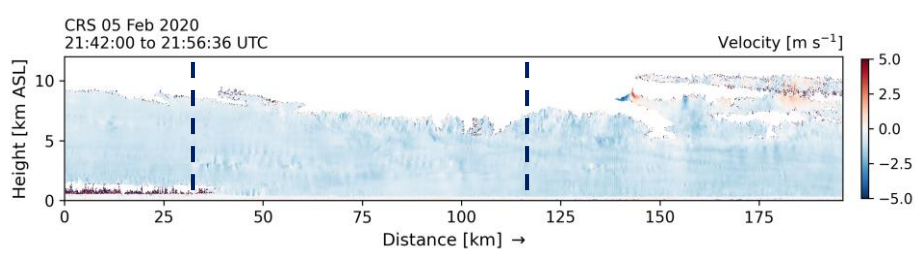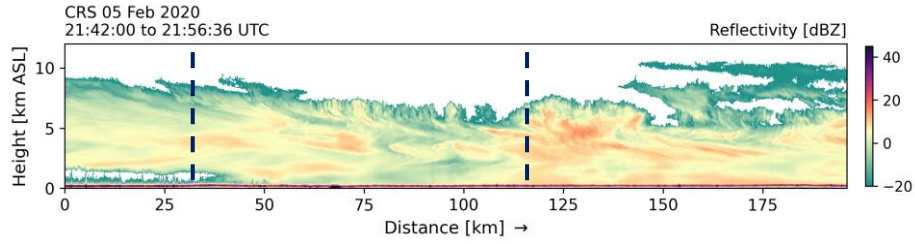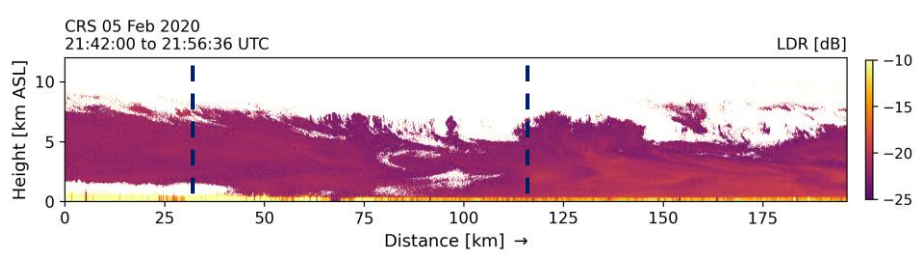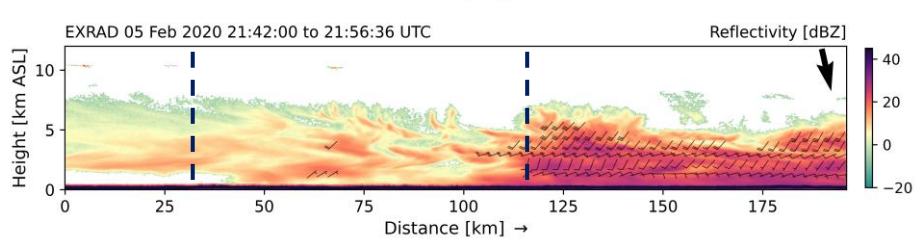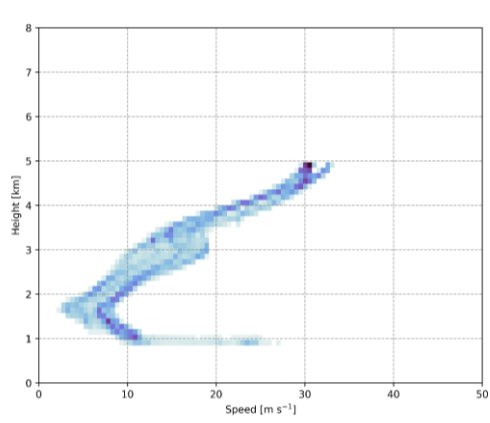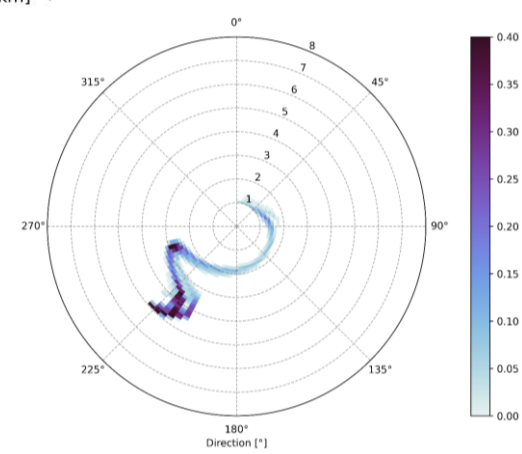



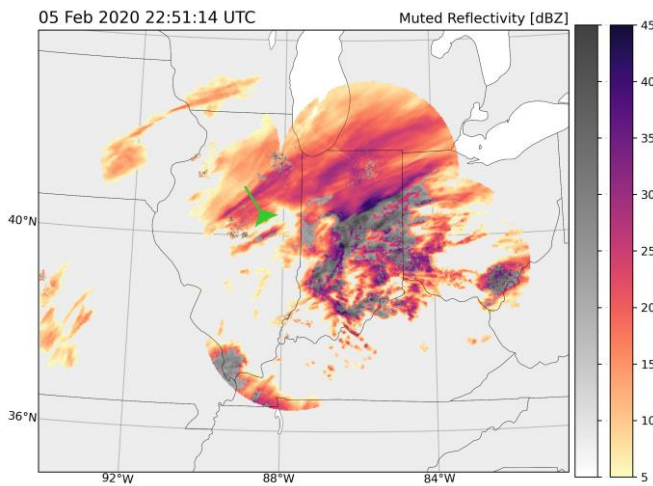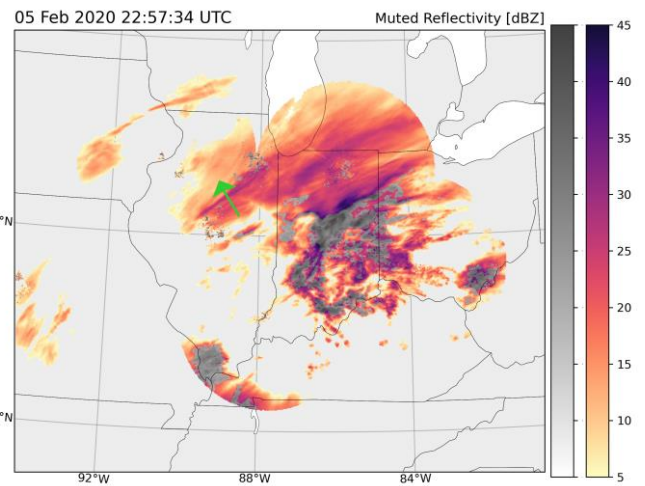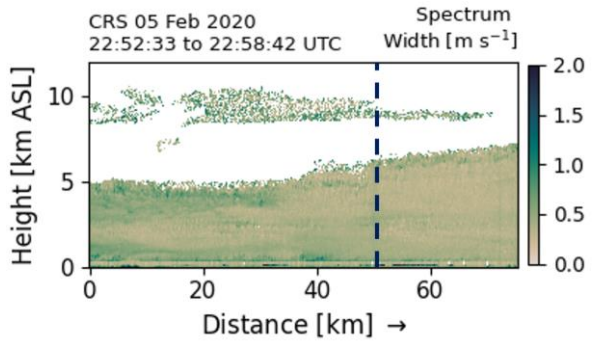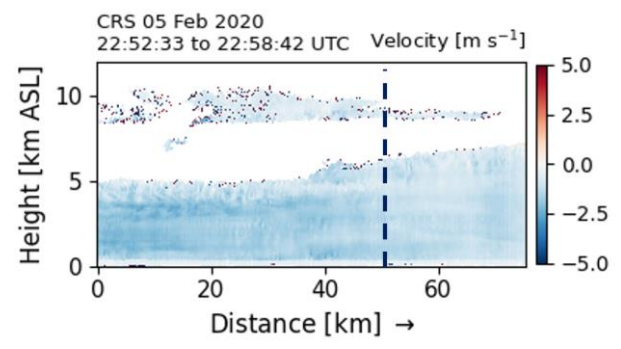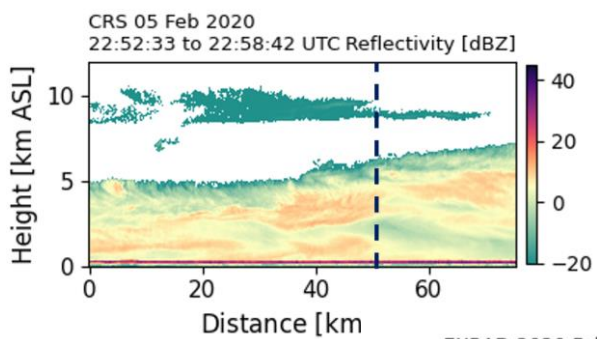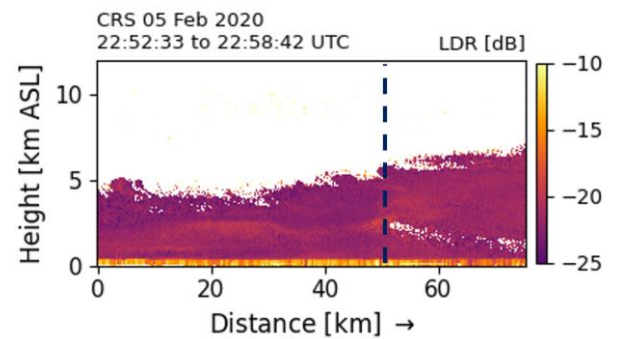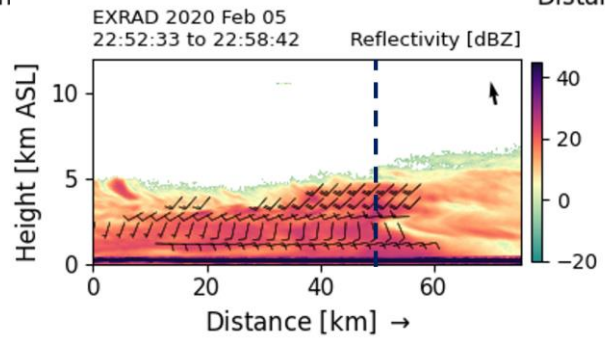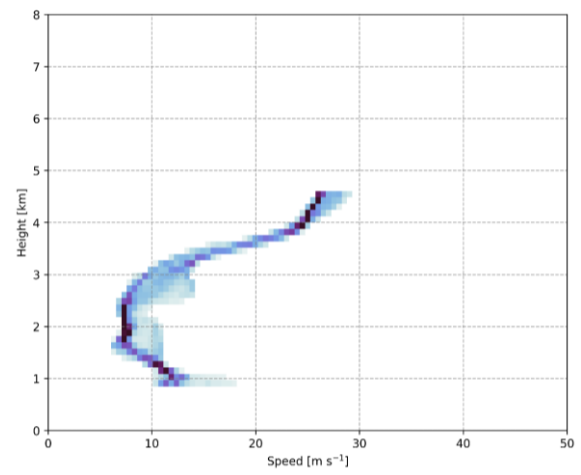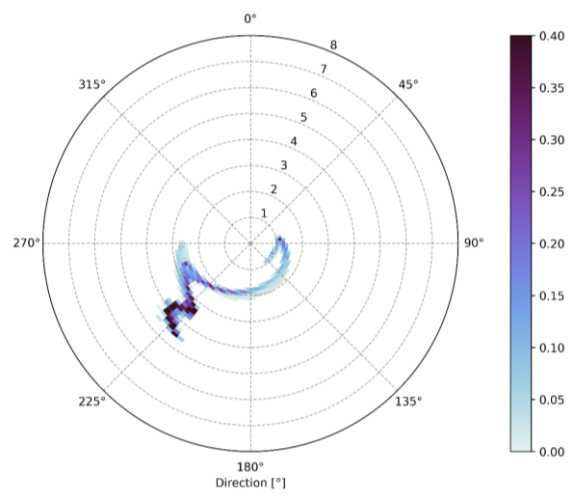

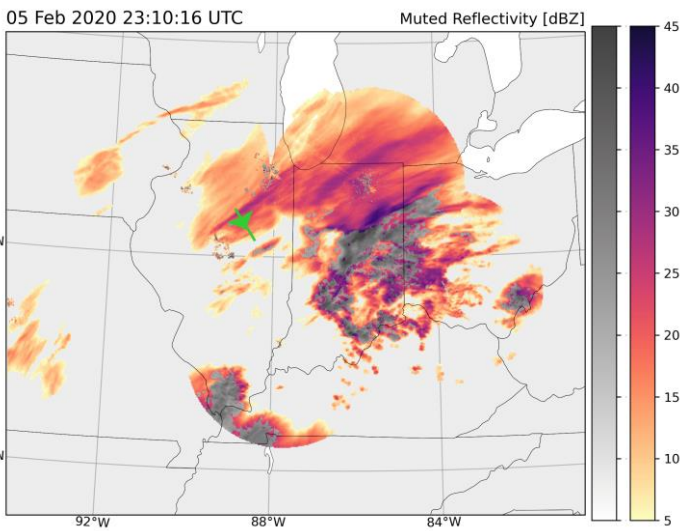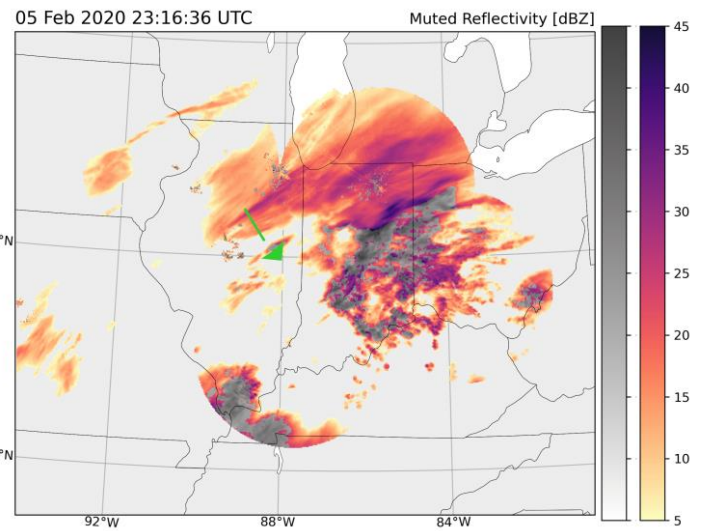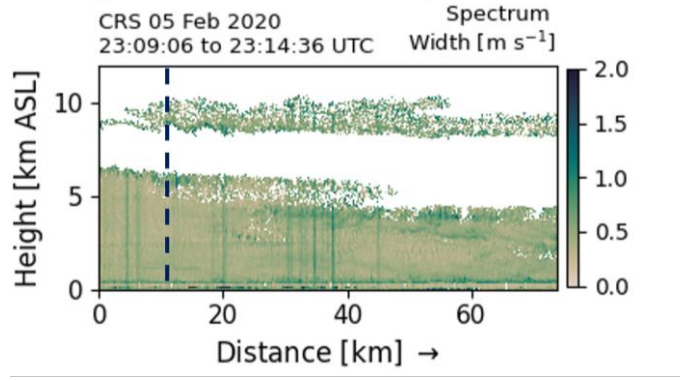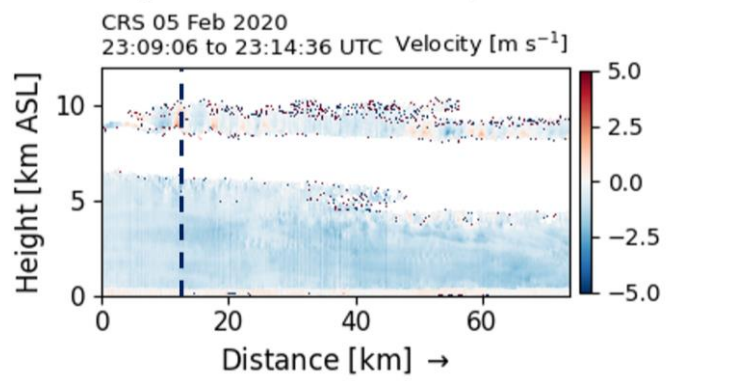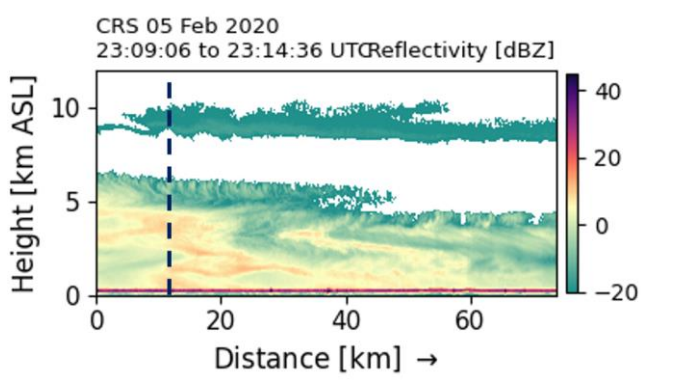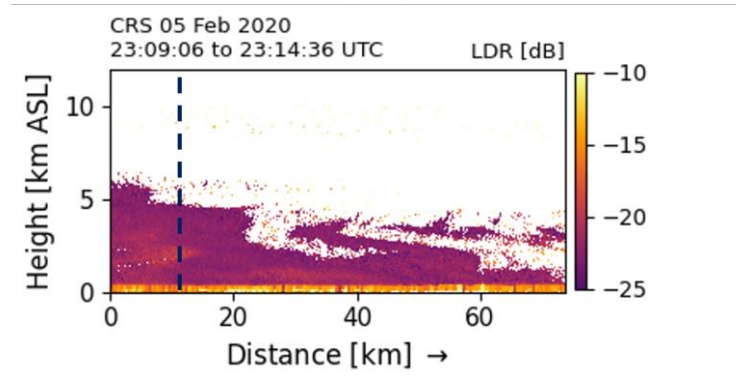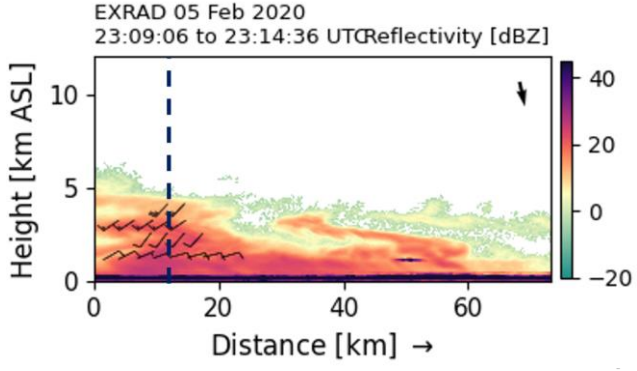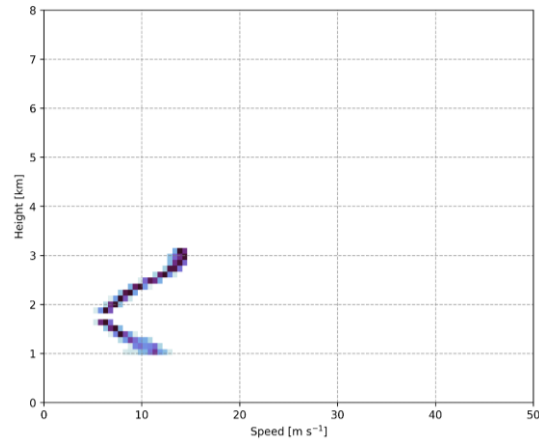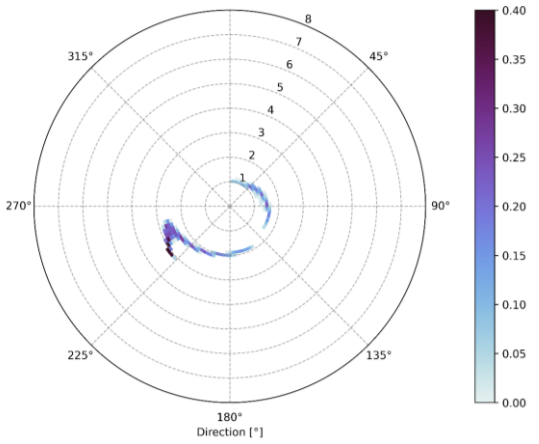



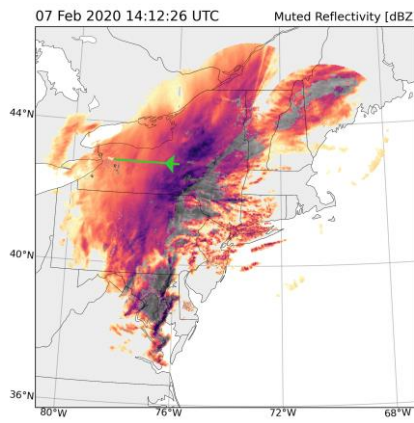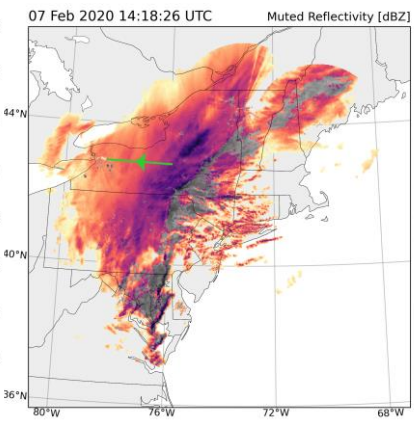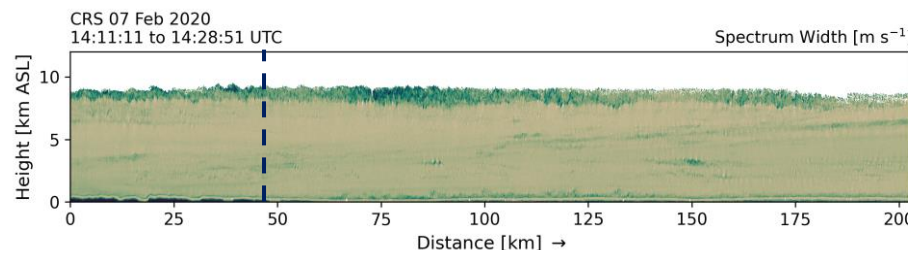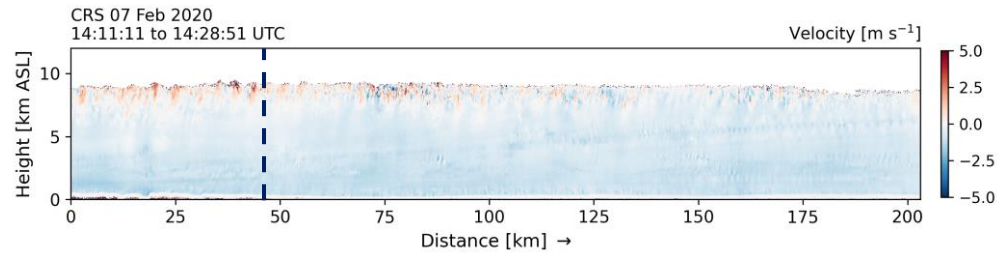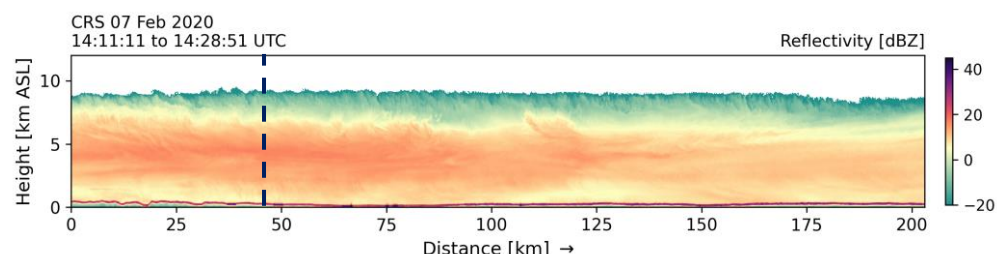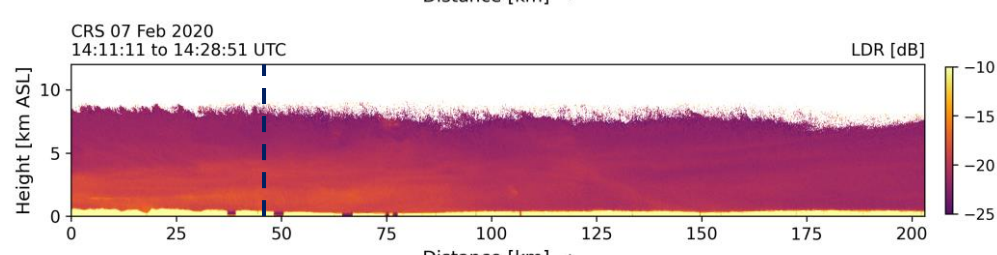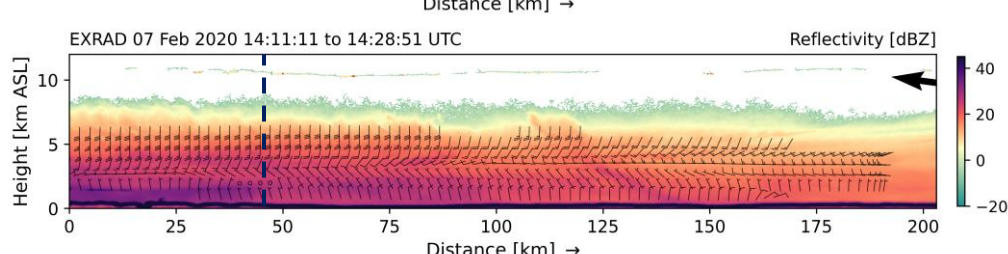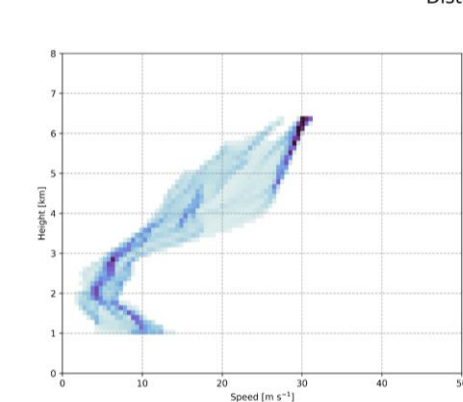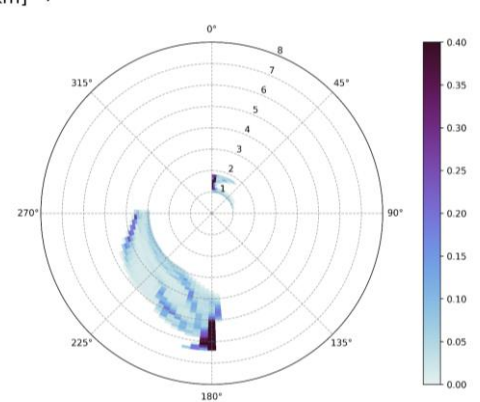

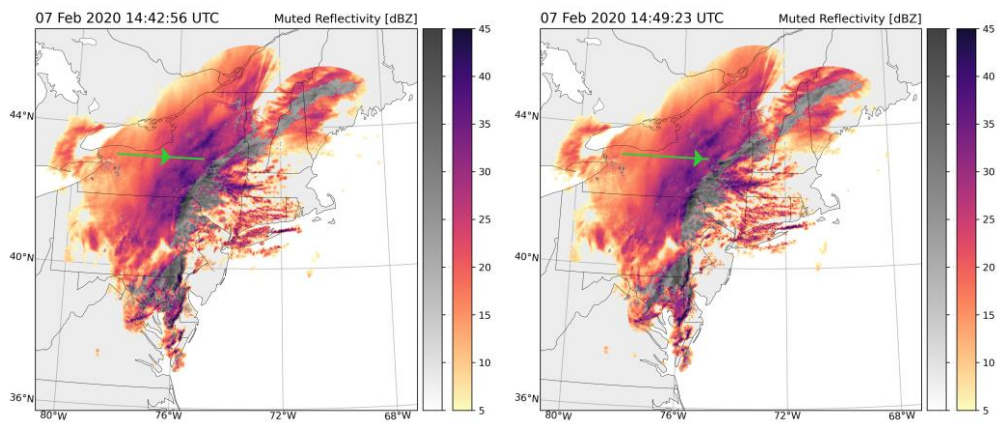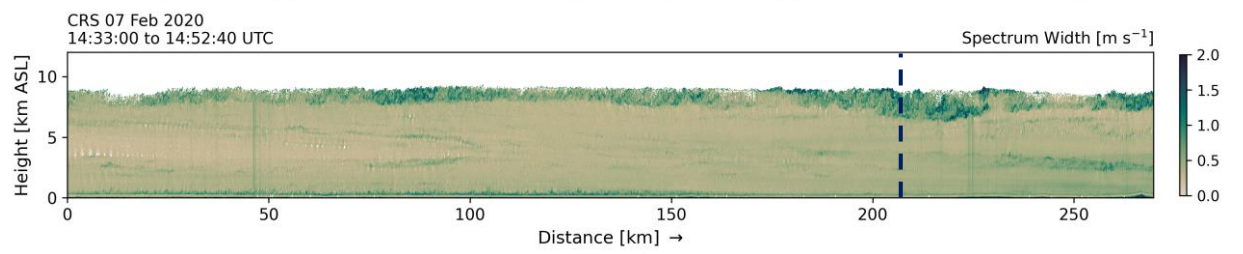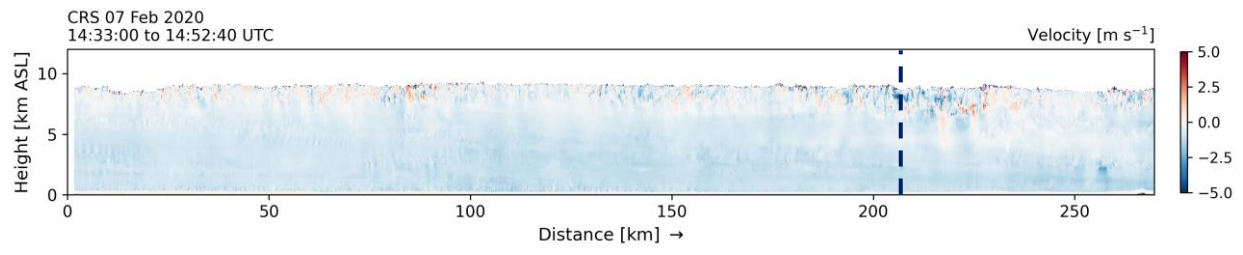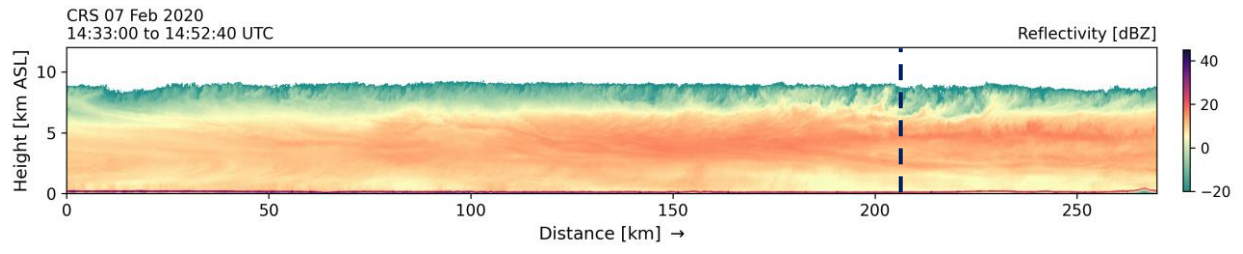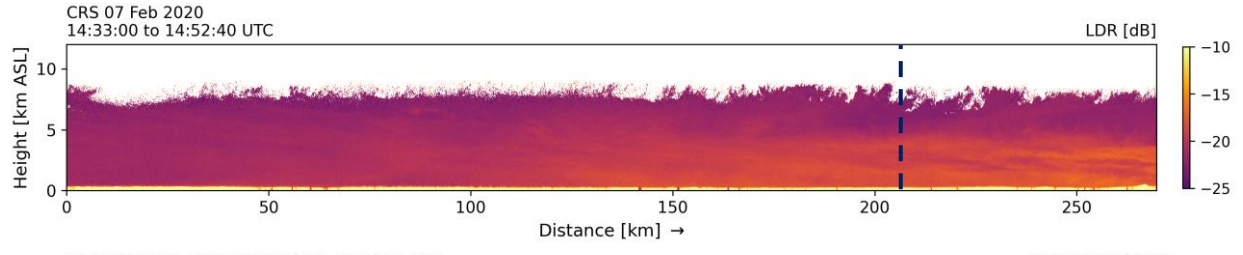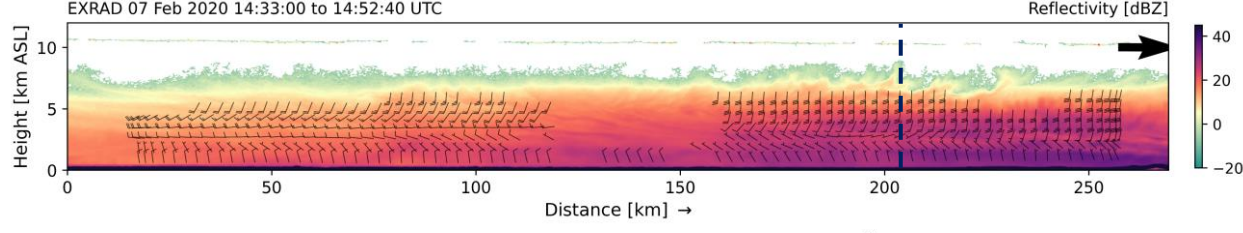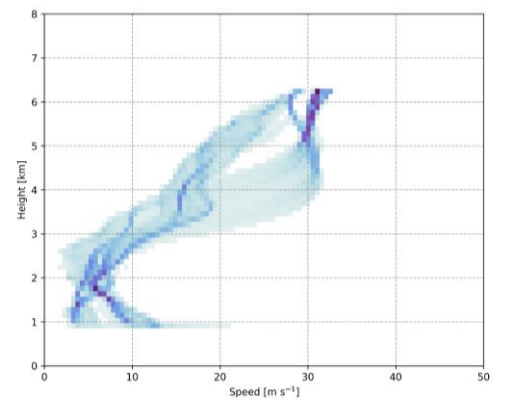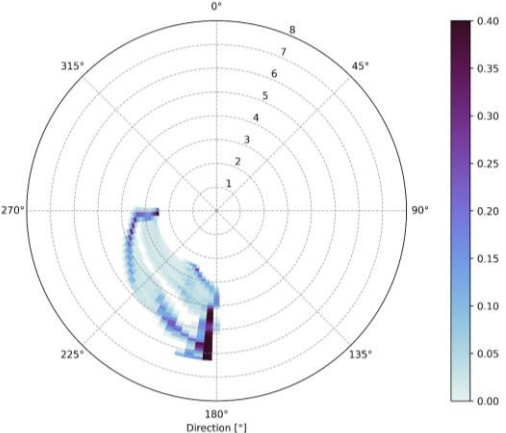



07 Feb 2020 14:56:10 UTC

Muted Reflectivity [dBZ]

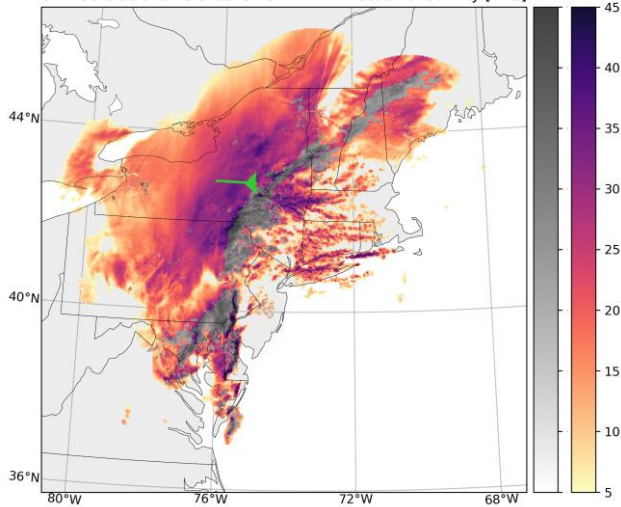

07 Feb 2020 15:02:07 UTC

Muted Reflectivity [dBZ]

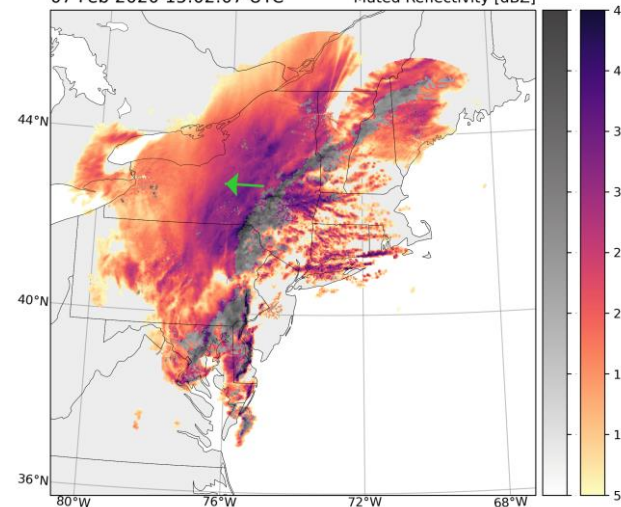

CRS 07 Feb 2020  
14:56:49 to 15:04:40 UTC

Spectrum  
Width [ $m s^{-1}$ ]

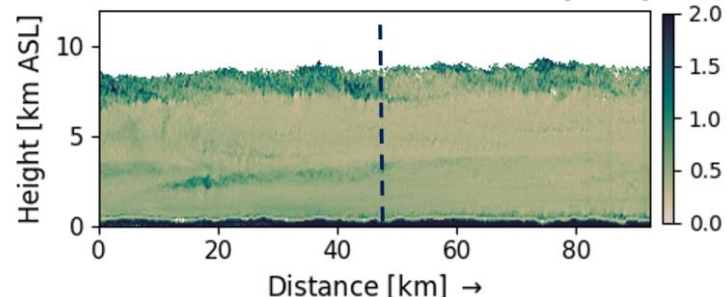

CRS 07 Feb 2020

14:56:49 to 15:04:40 UTC

Reflectivity [dBZ]

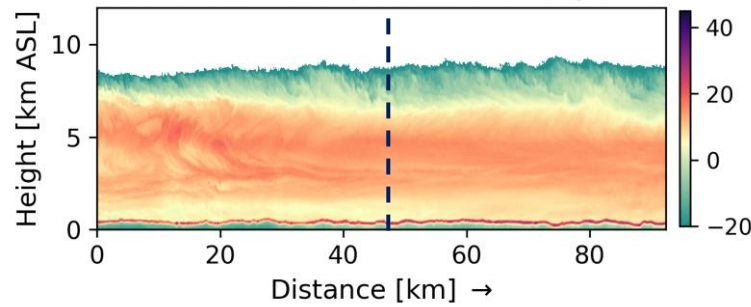

CRS 07 Feb 2020  
14:56:49 to 15:04:40 UTC

Velocity [ $m s^{-1}$ ]

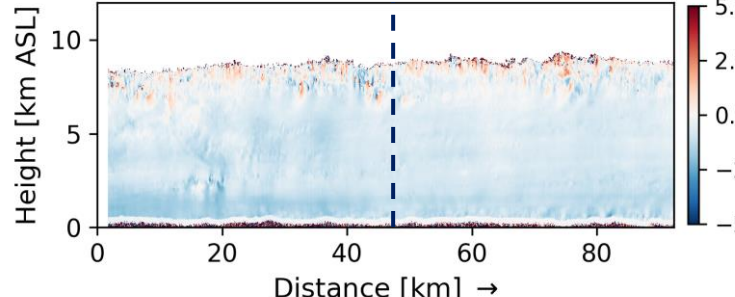

CRS 07 Feb 2020

14:56:49 to 15:04:40 UTC

LDR [dB]

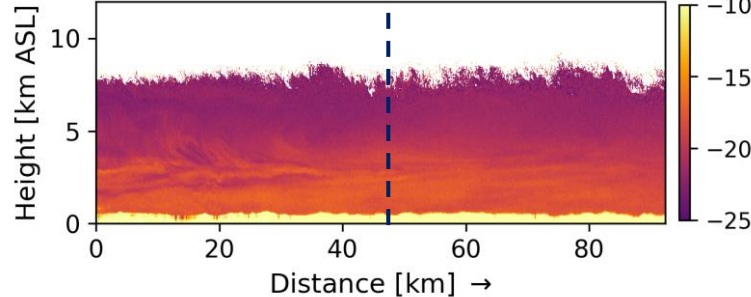

EXRAD 07 Feb 2020  
14:56:49 to 15:04:40 UTC

Reflectivity [dBZ]

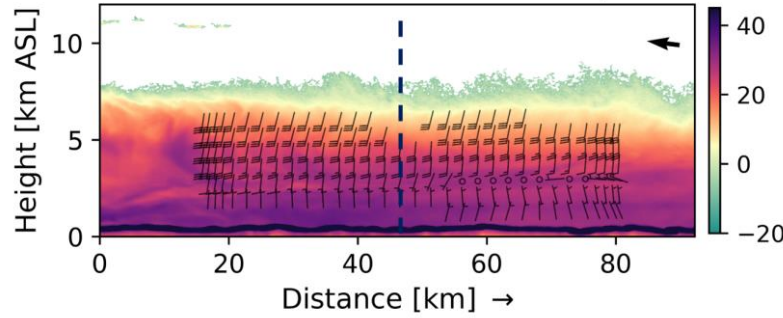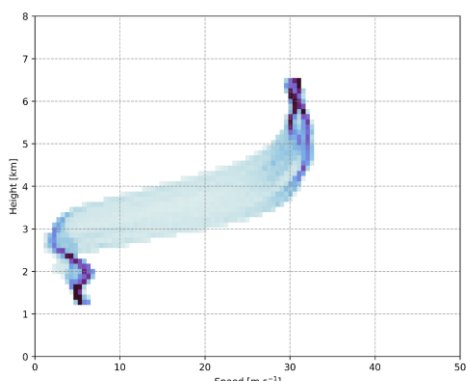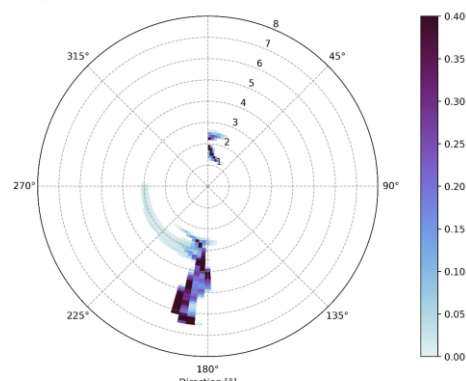

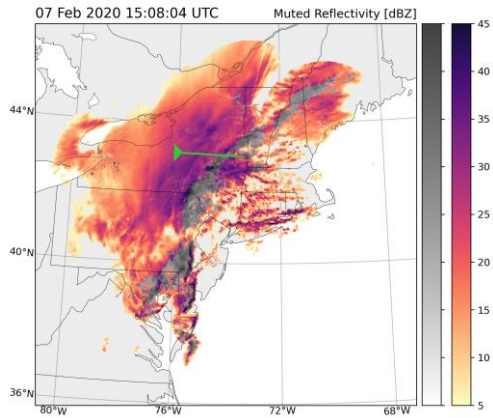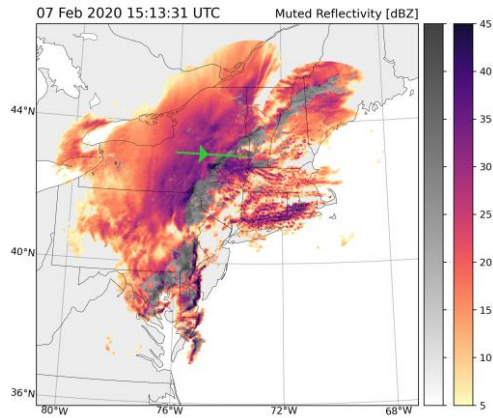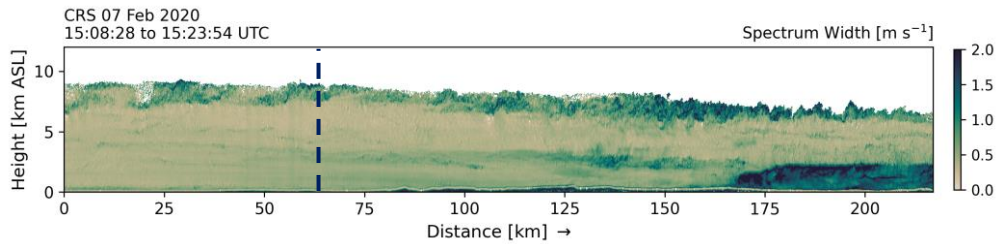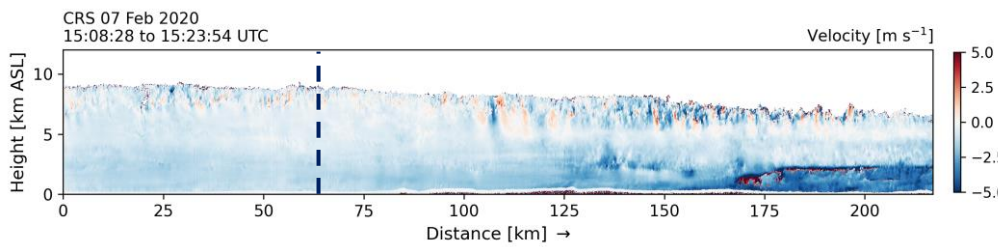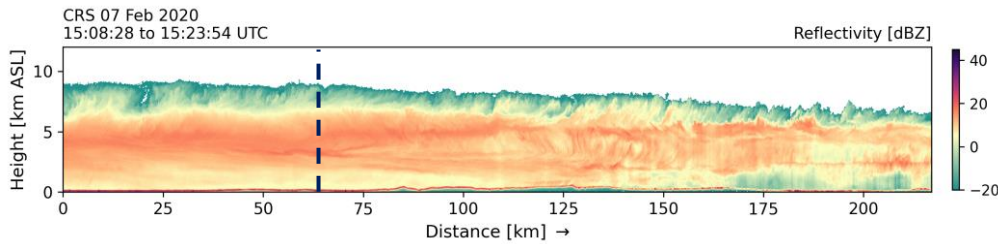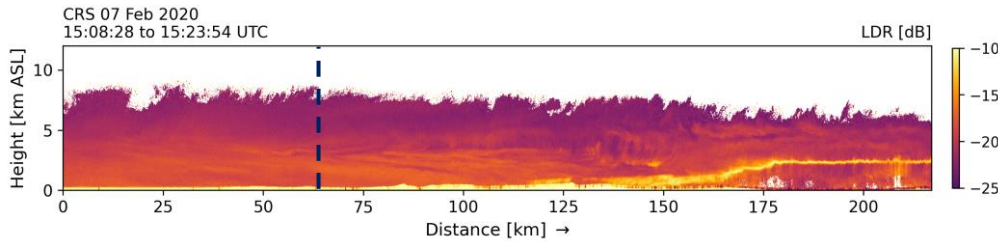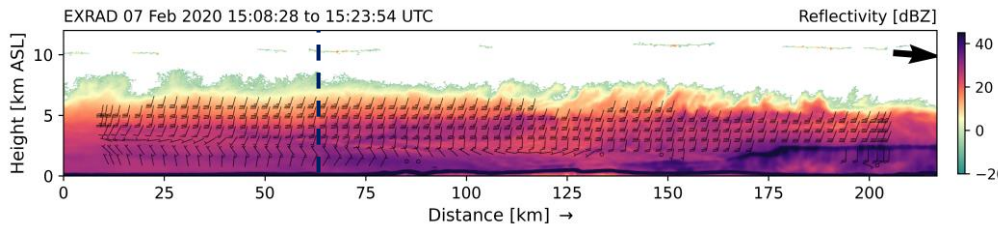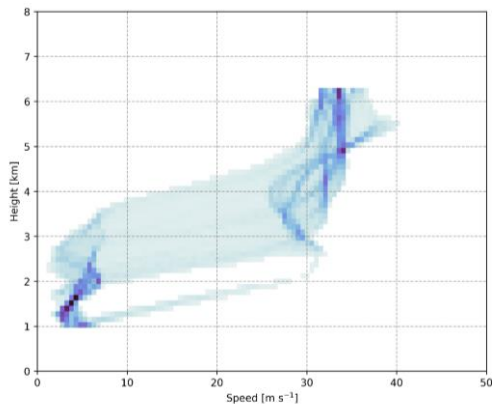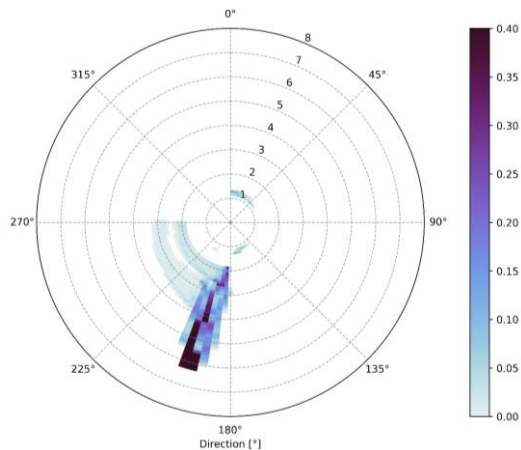



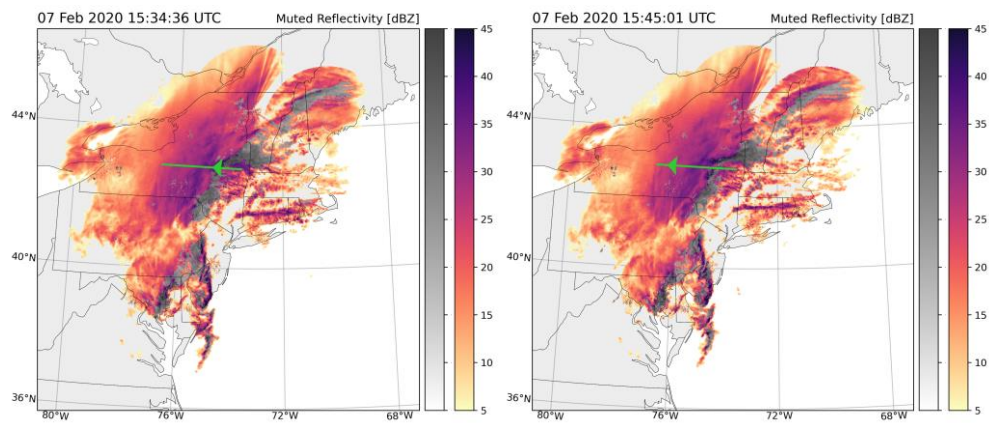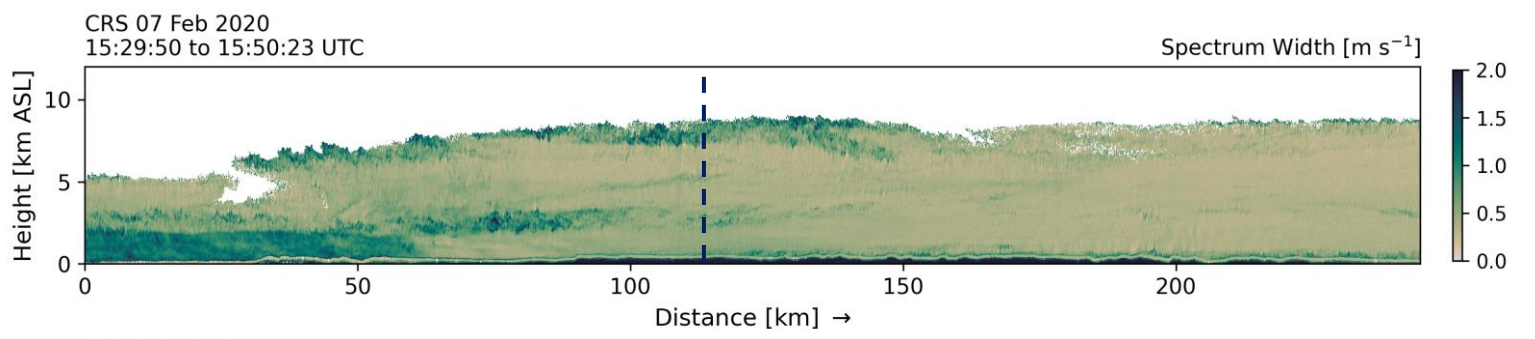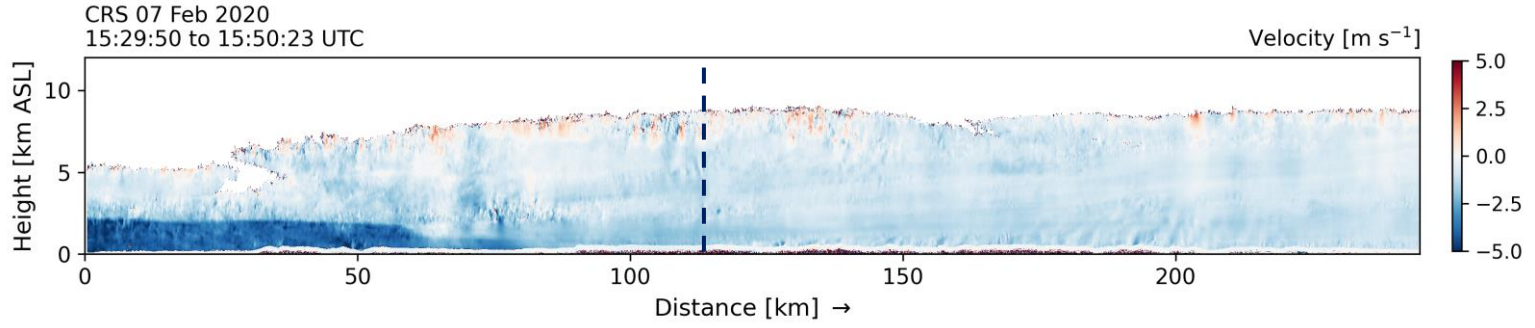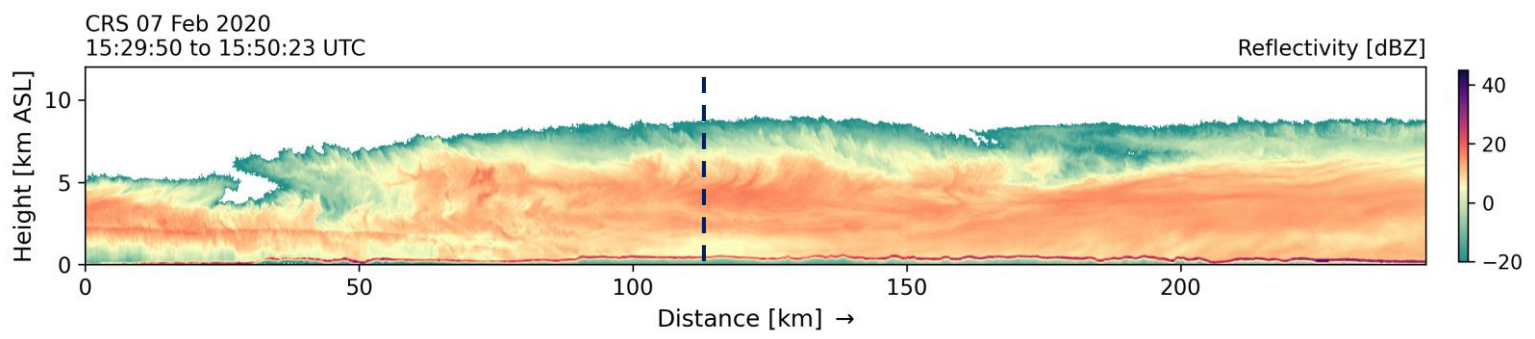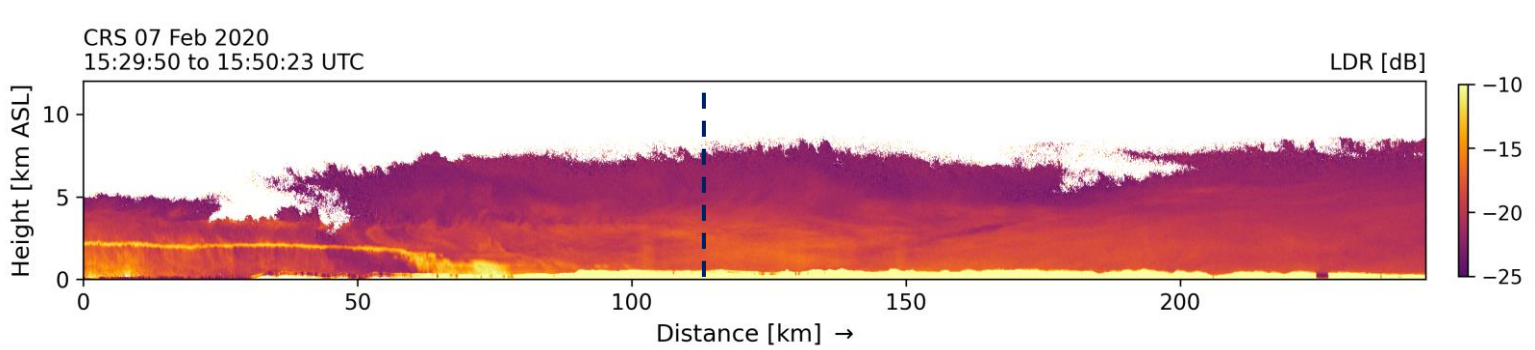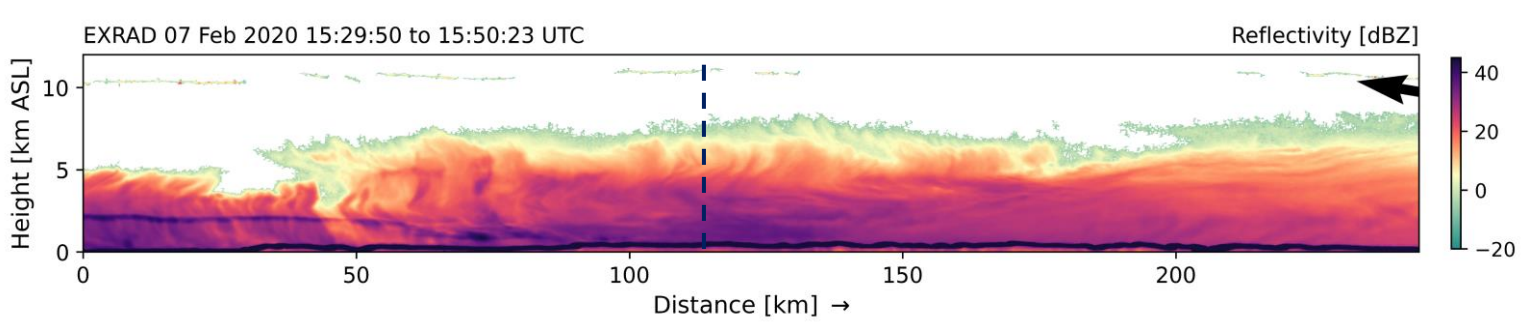

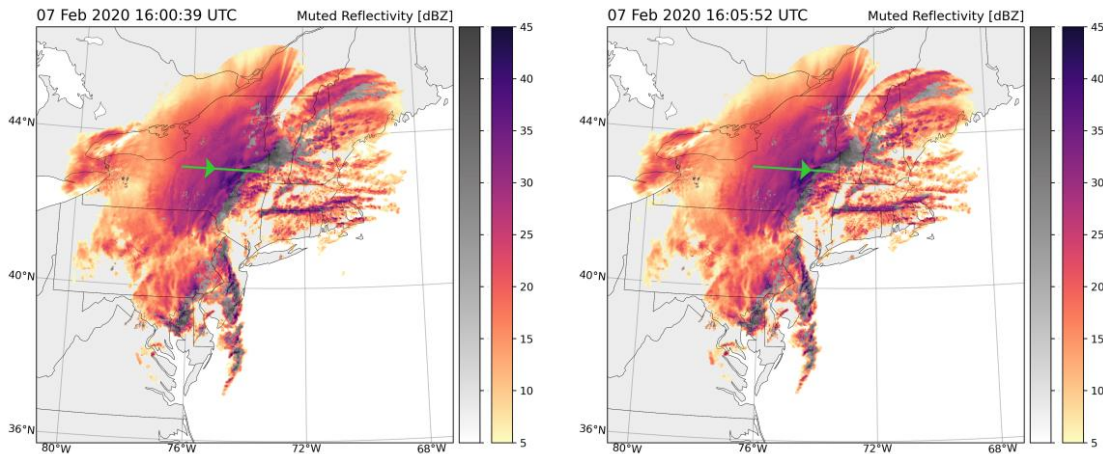

CRS 07 Feb 2020  
15:55:53 to 16:13:04 UTC

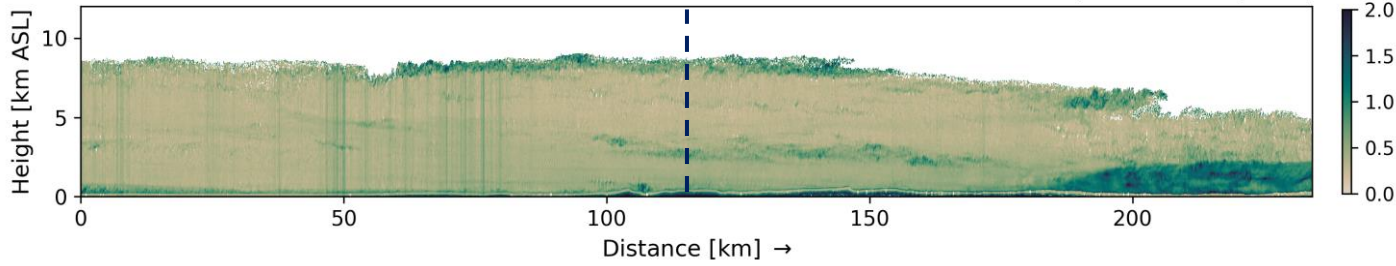

CRS 07 Feb 2020  
15:55:53 to 16:13:04 UTC

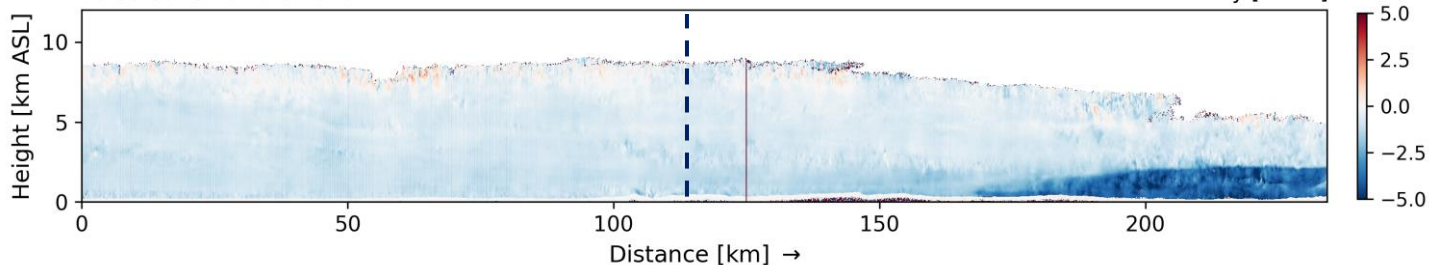

CRS 07 Feb 2020  
15:55:53 to 16:13:04 UTC

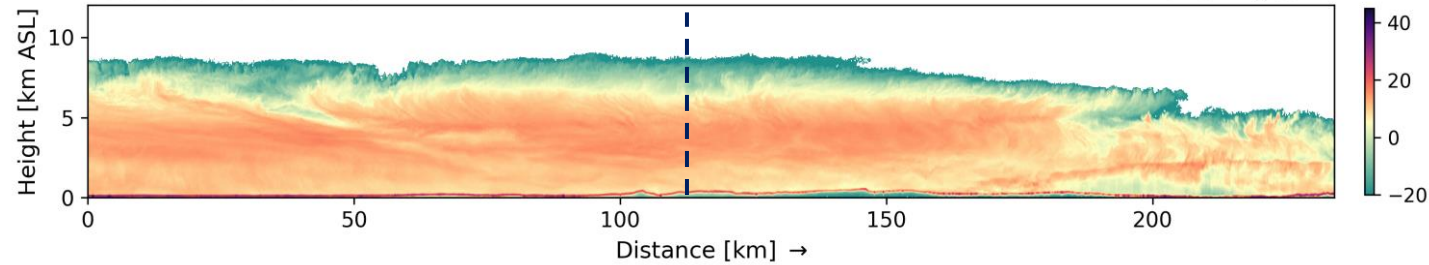

CRS 07 Feb 2020  
15:55:53 to 16:13:04 UTC

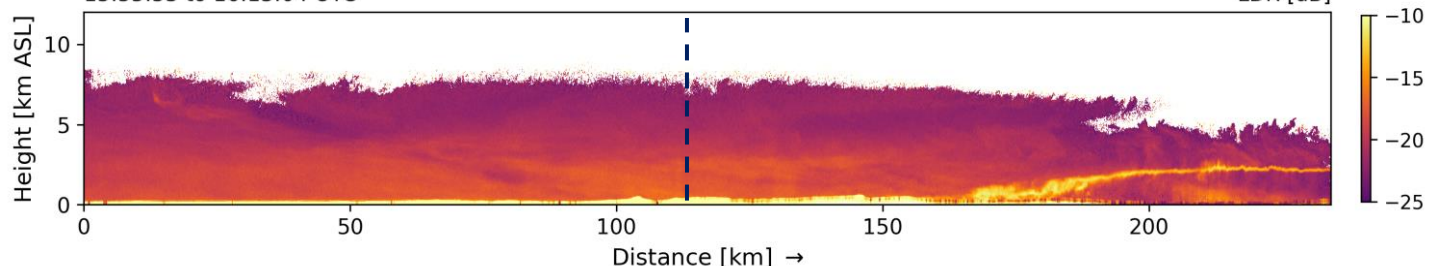

EXRAD 07 Feb 2020 15:55:53 to 16:13:04 UTC

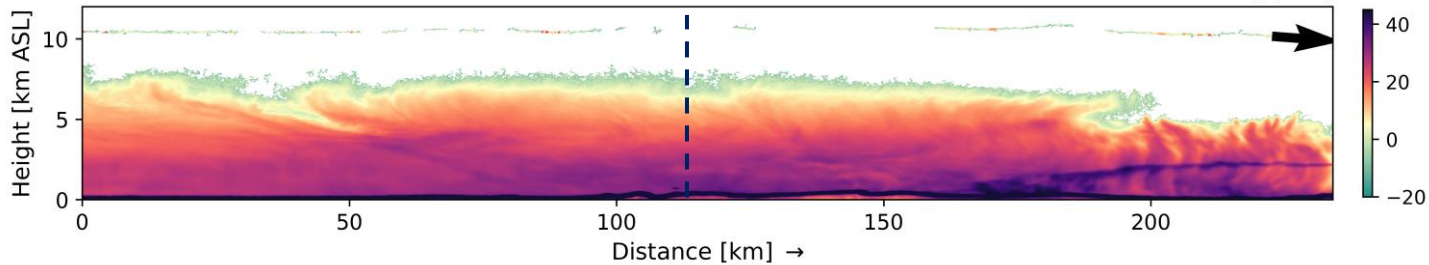



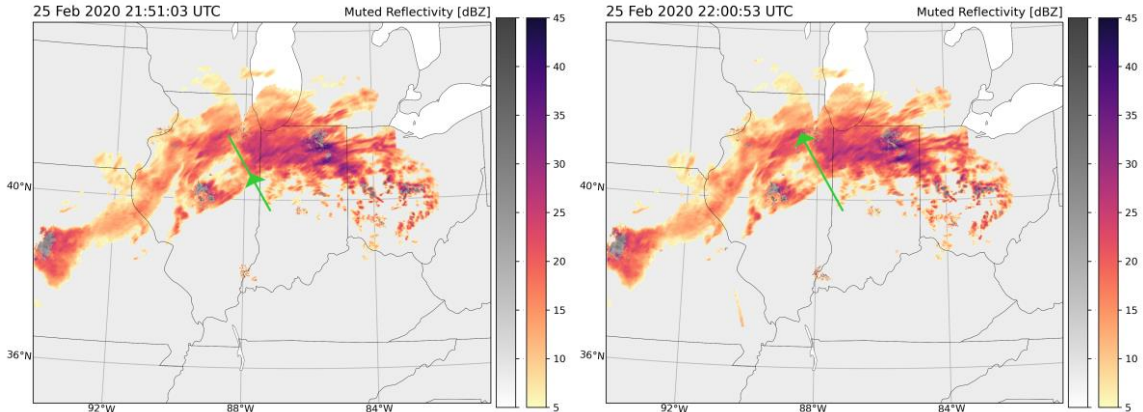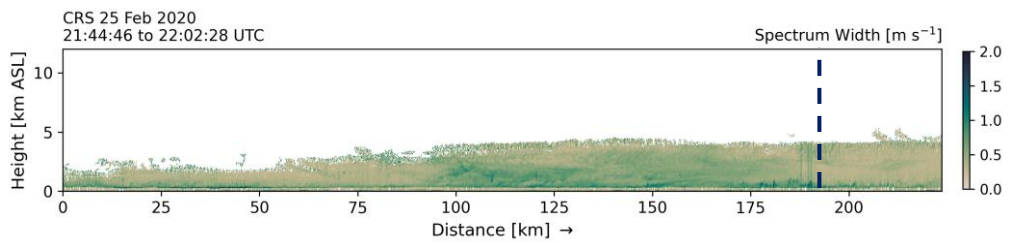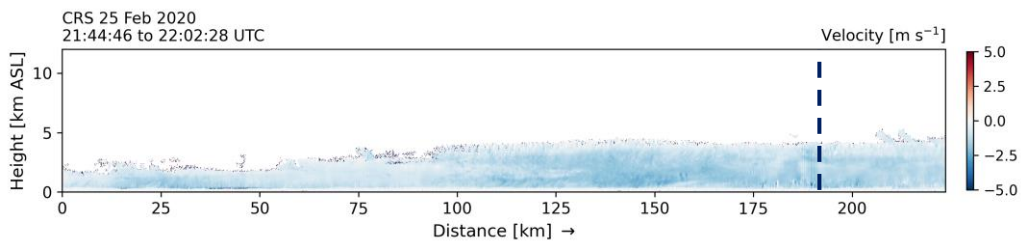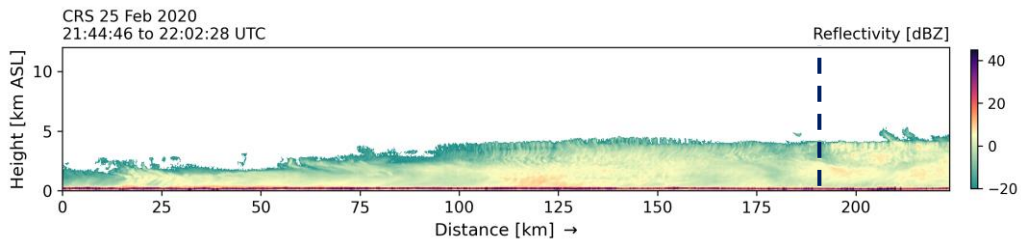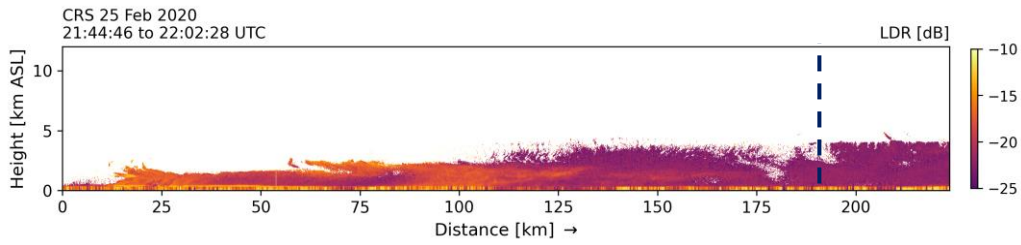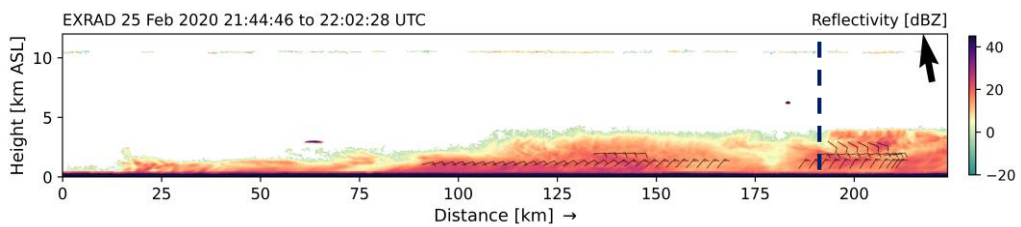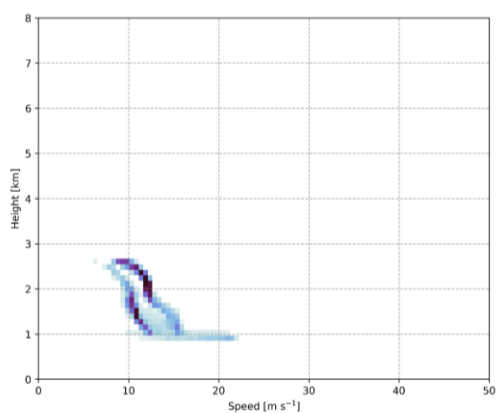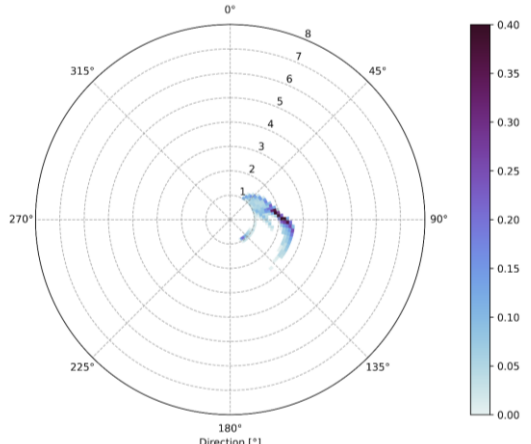

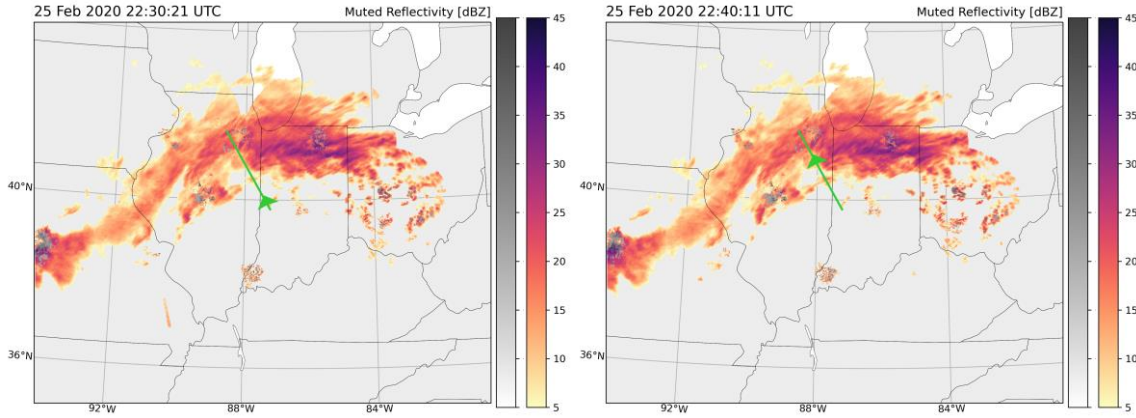

CRS 25 Feb 2020  
22:29:30 to 22:48:03 UTC

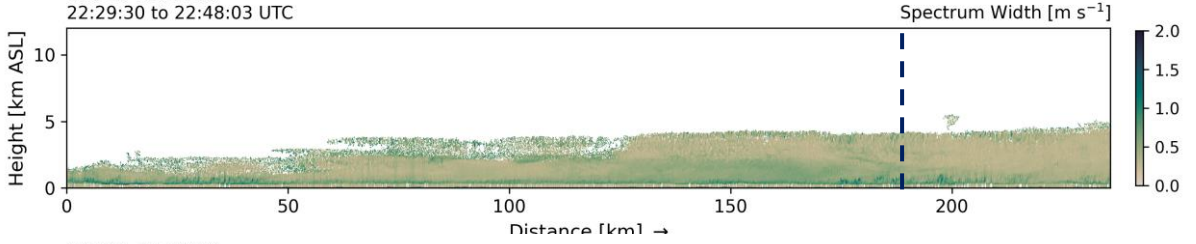

CRS 25 Feb 2020  
22:29:30 to 22:48:03 UTC

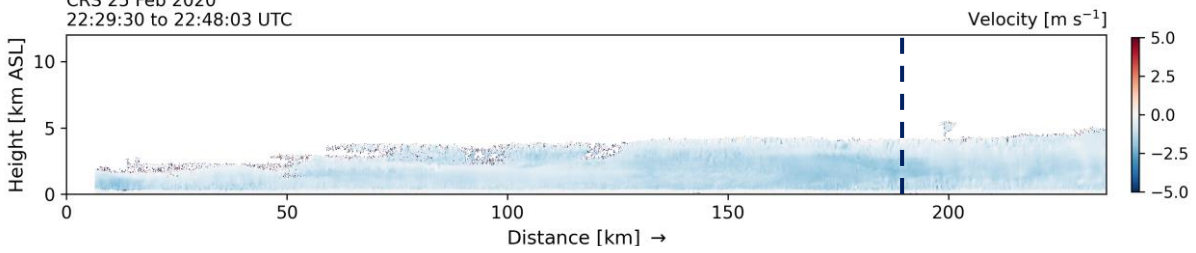

CRS 25 Feb 2020  
22:29:30 to 22:48:03 UTC

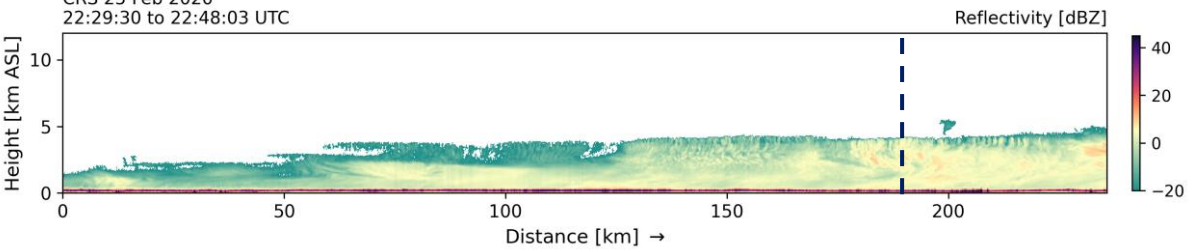

CRS 25 Feb 2020  
22:29:30 to 22:48:03 UTC

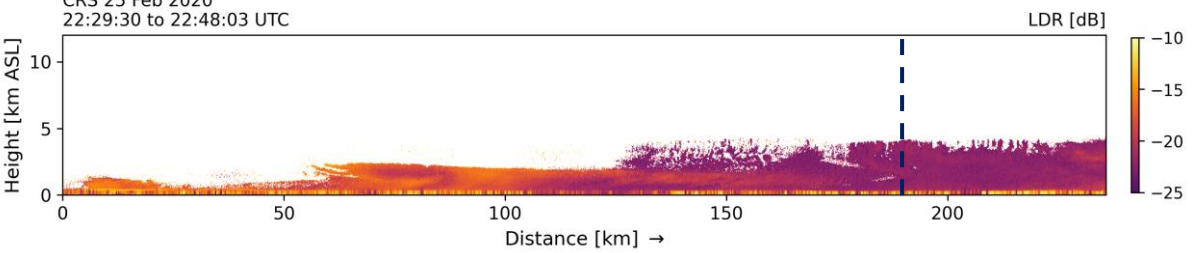

EXRAD 25 Feb 2020 22:29:30 to 22:48:03 UTC

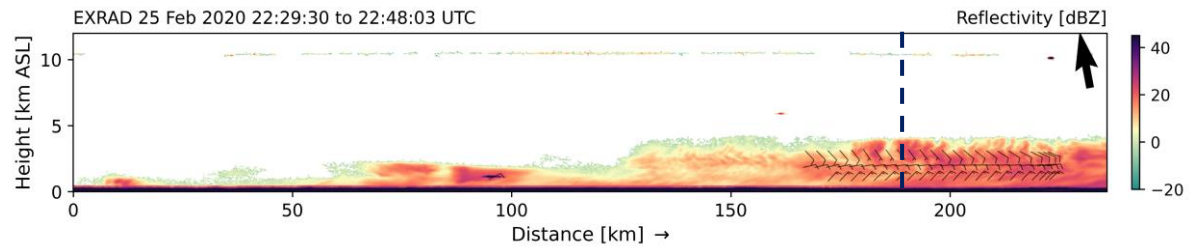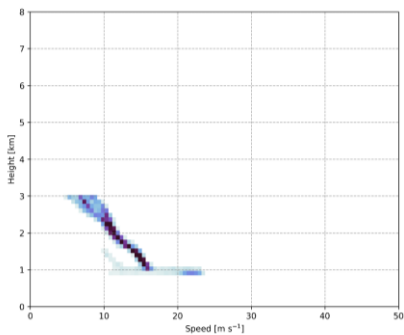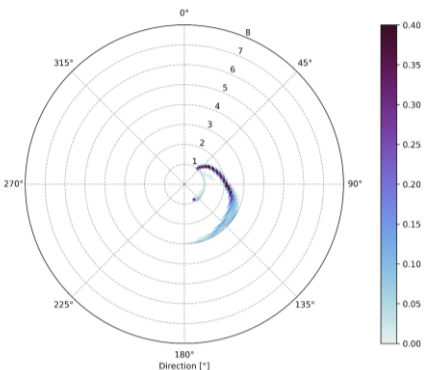

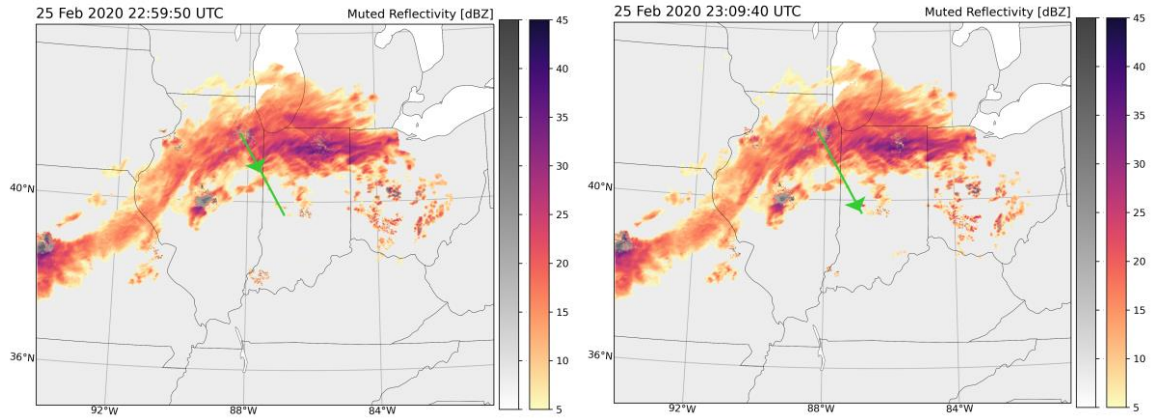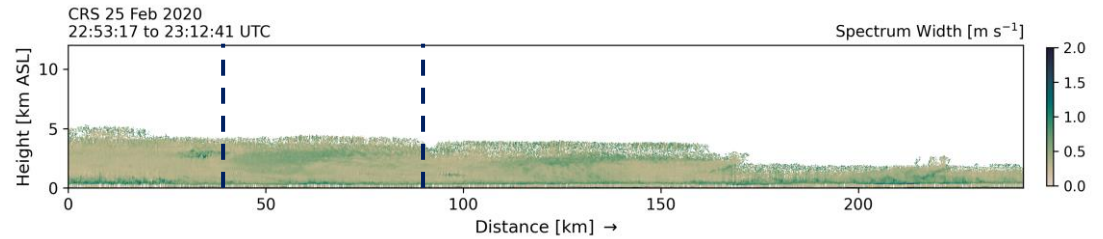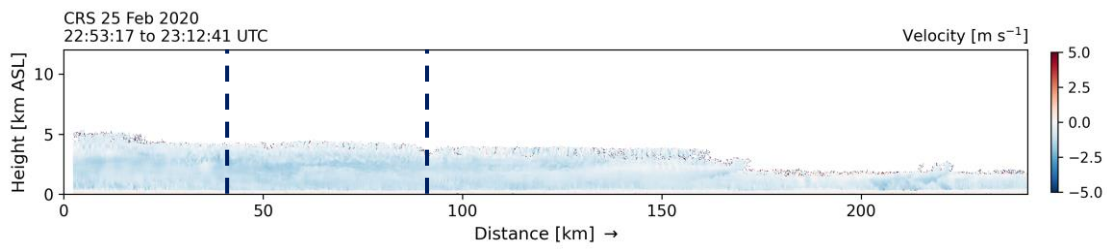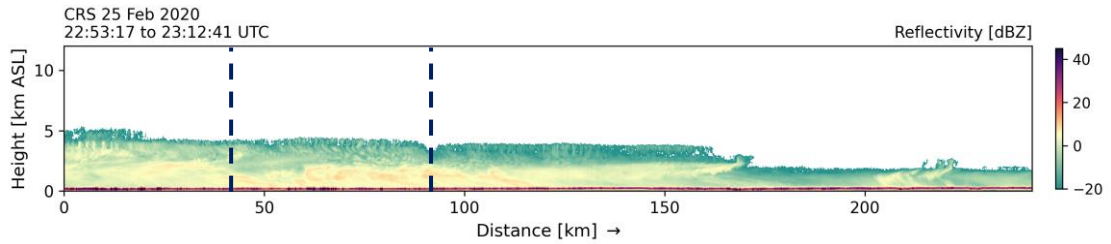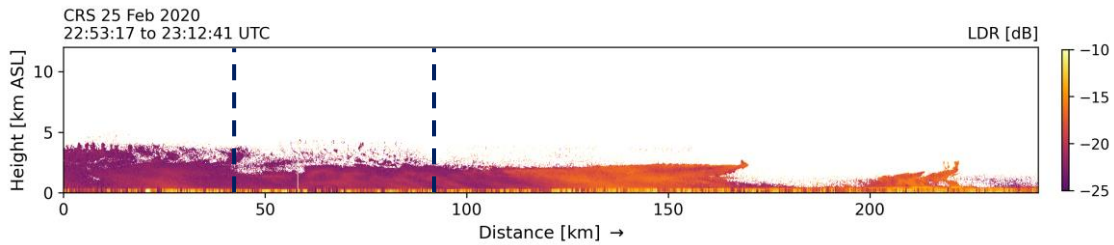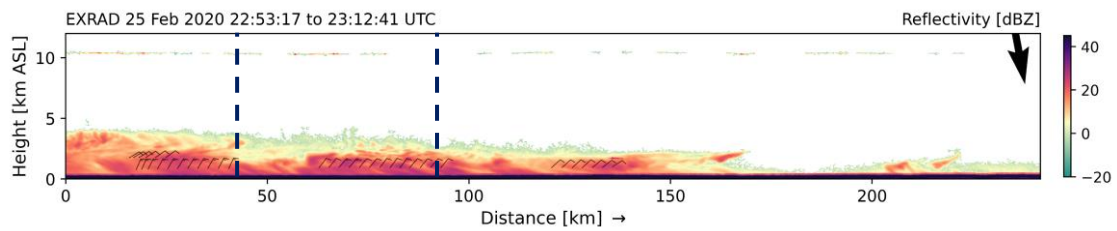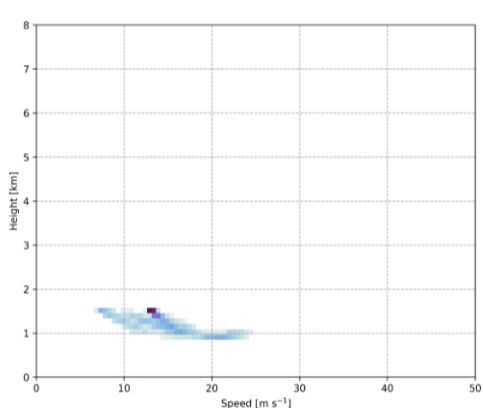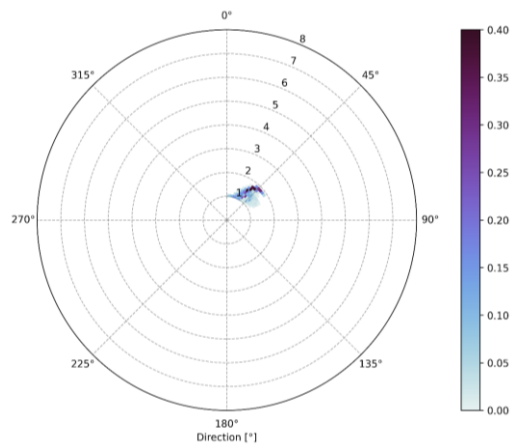



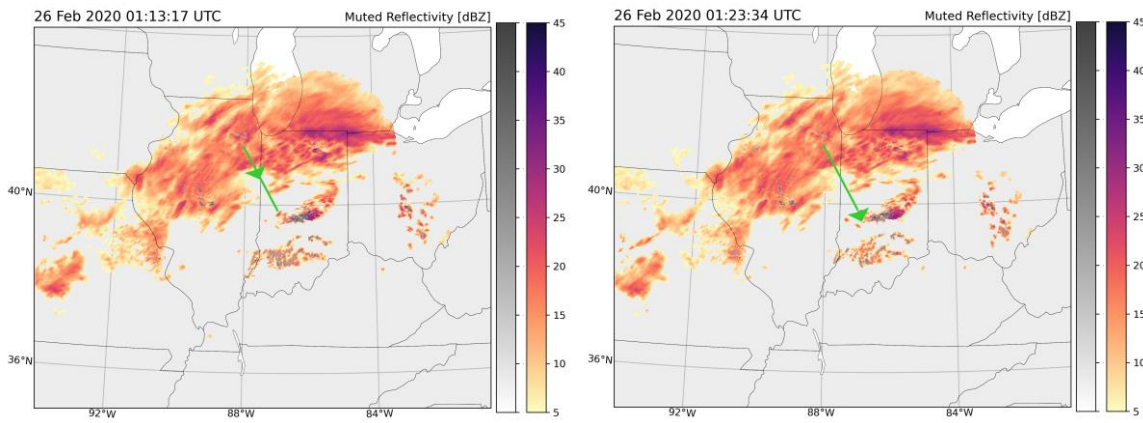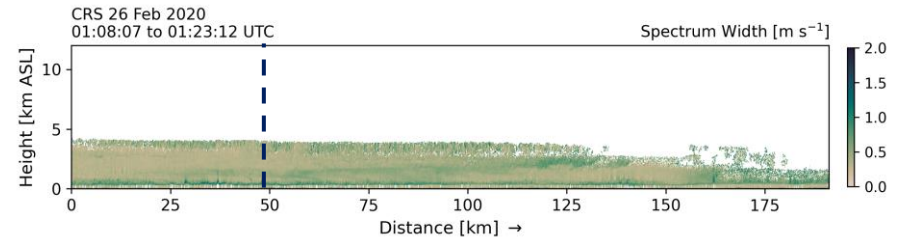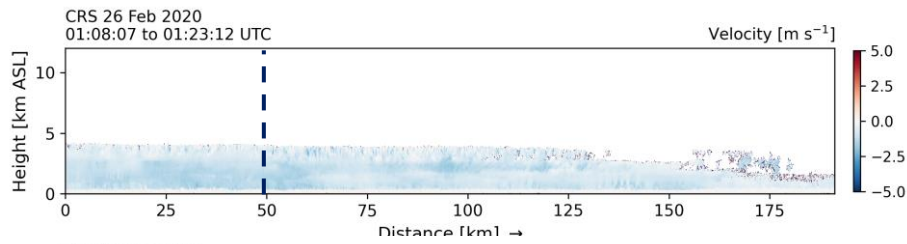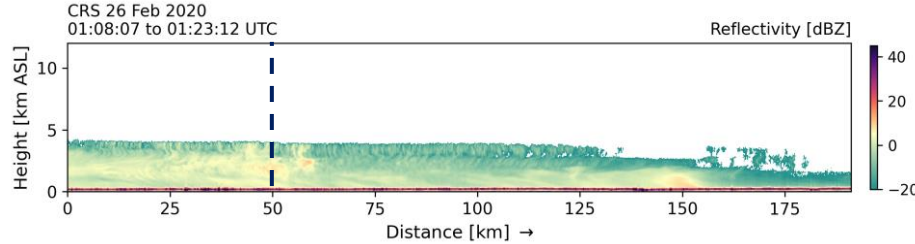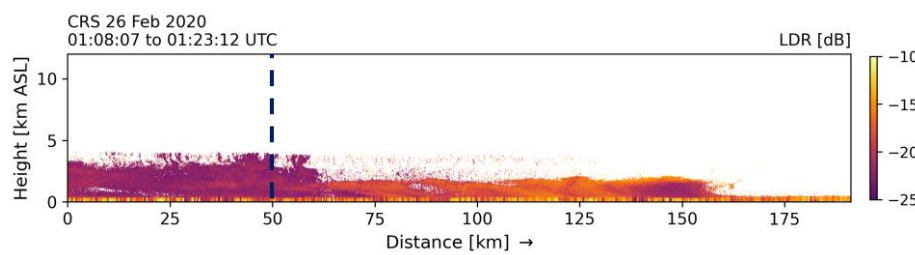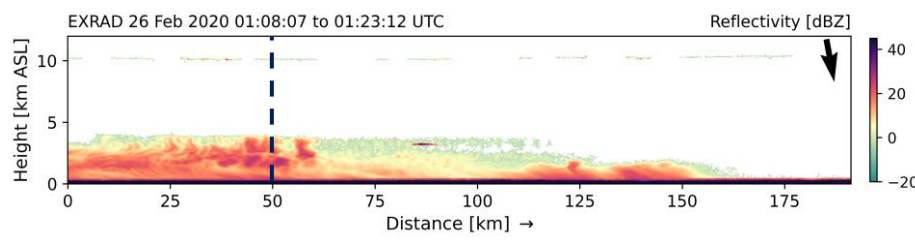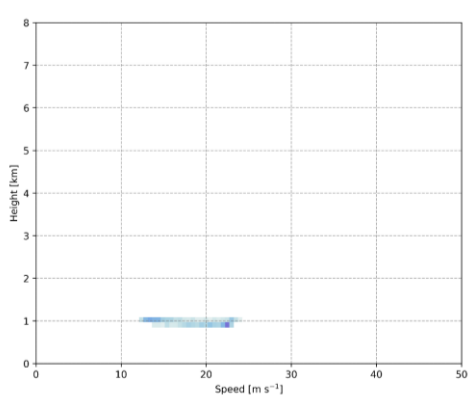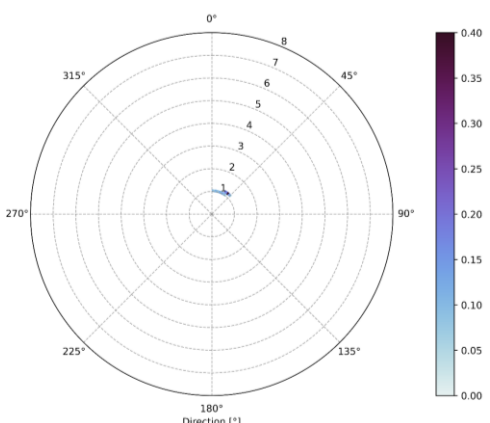

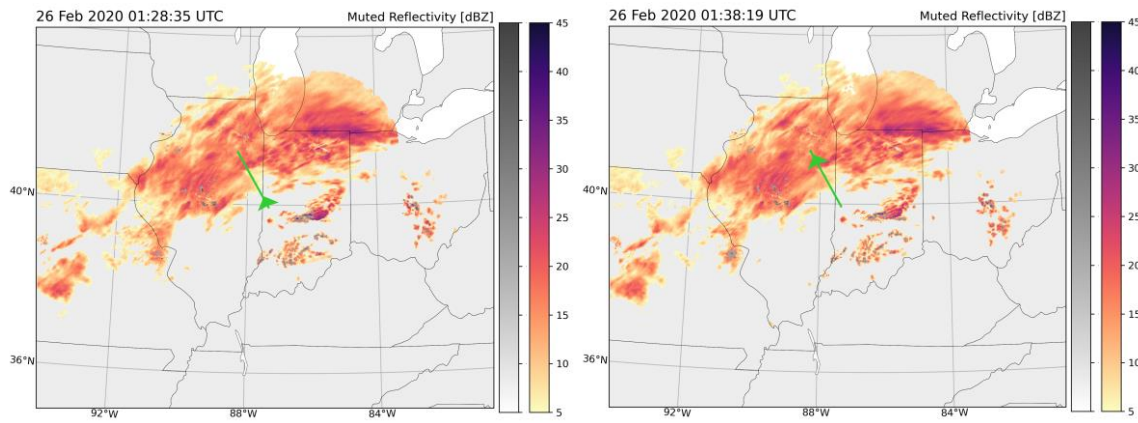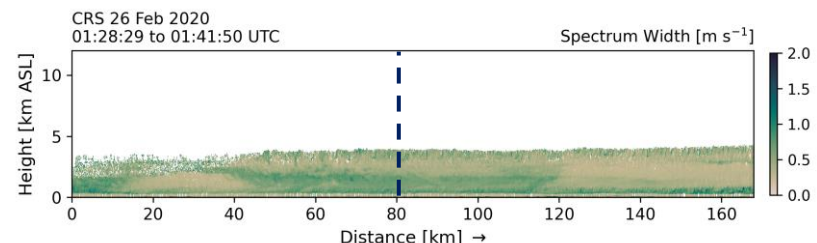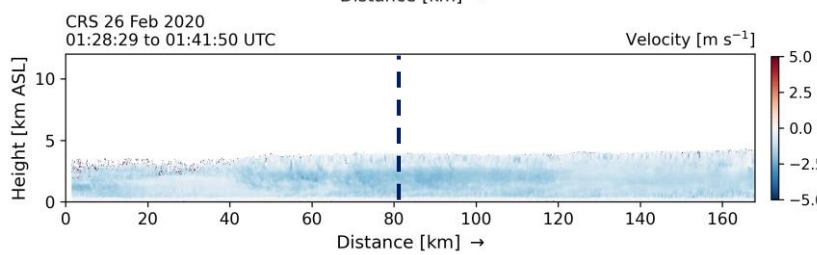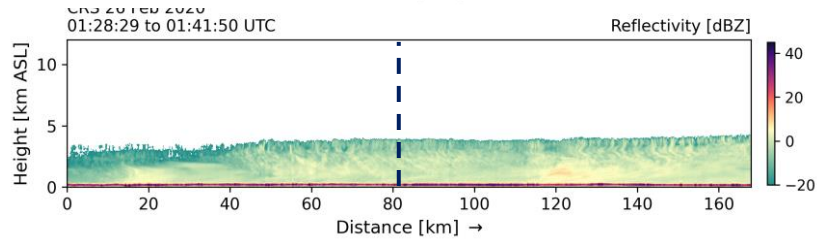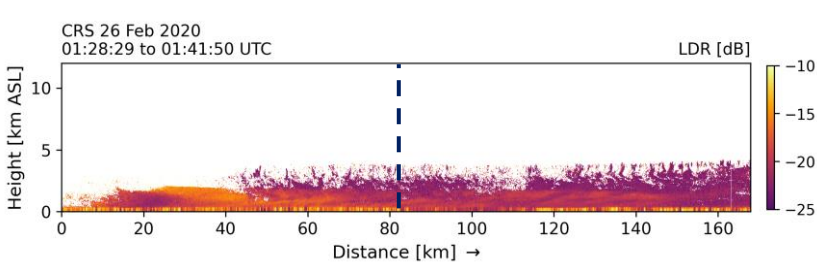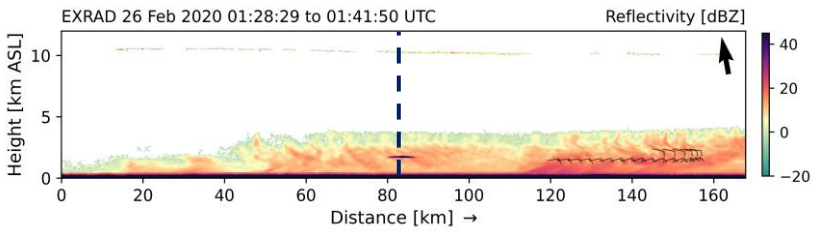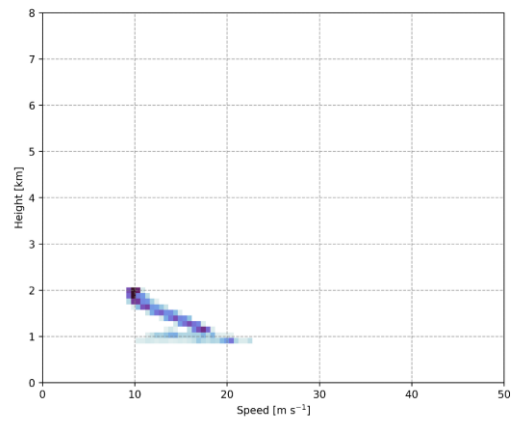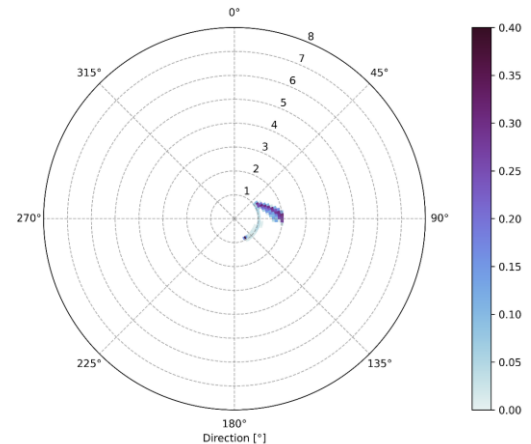

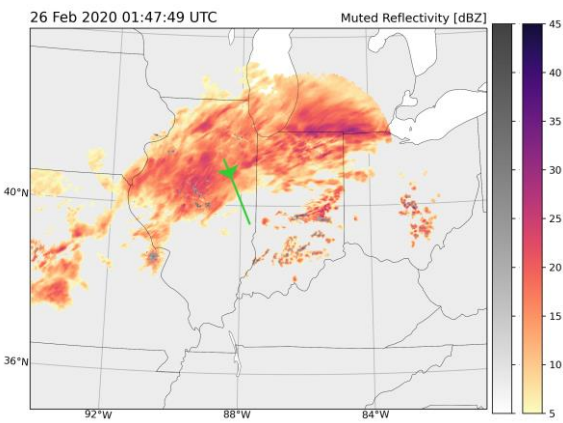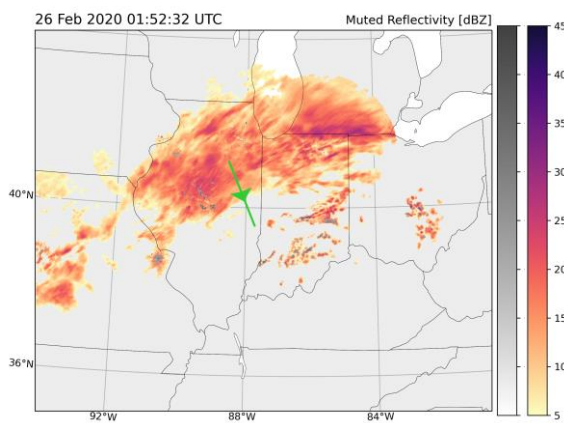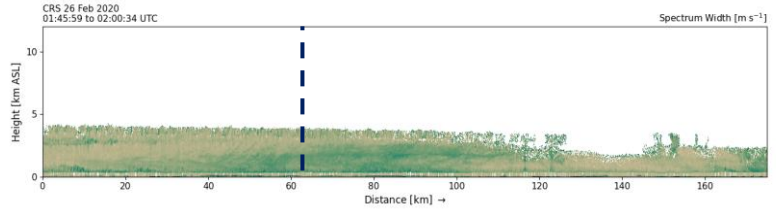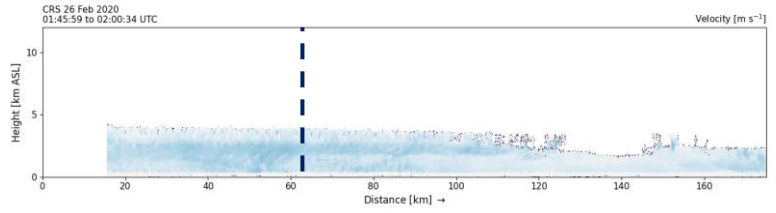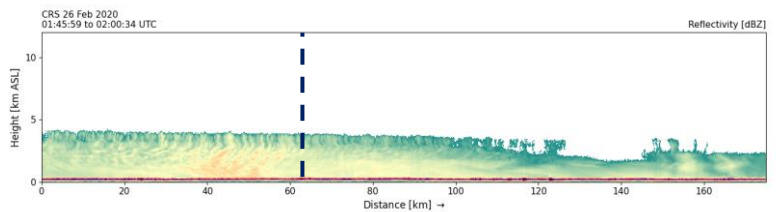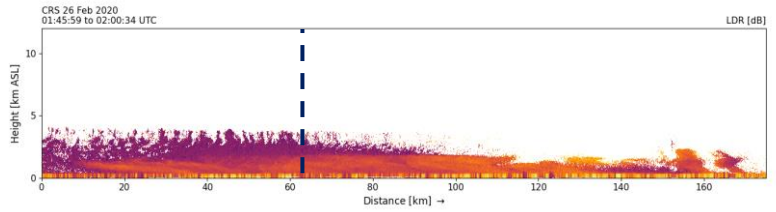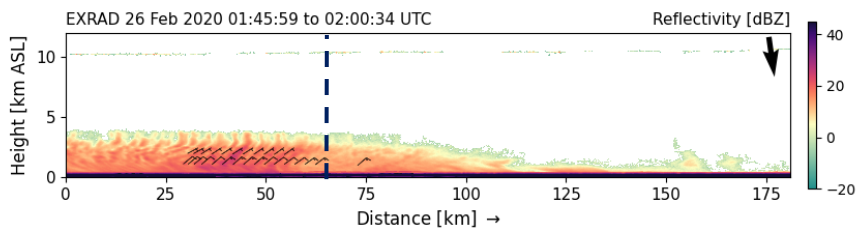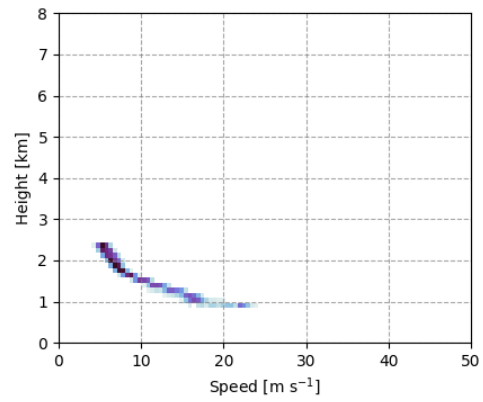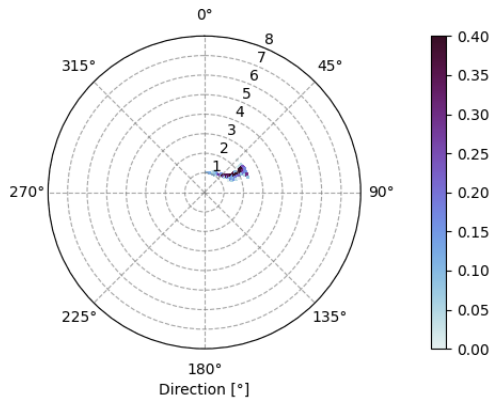



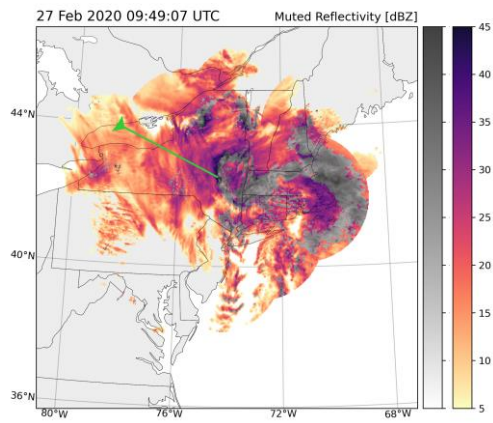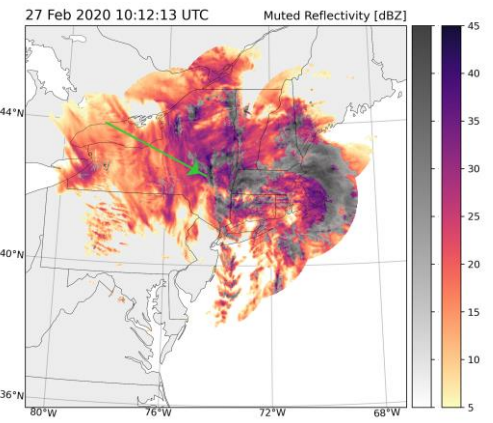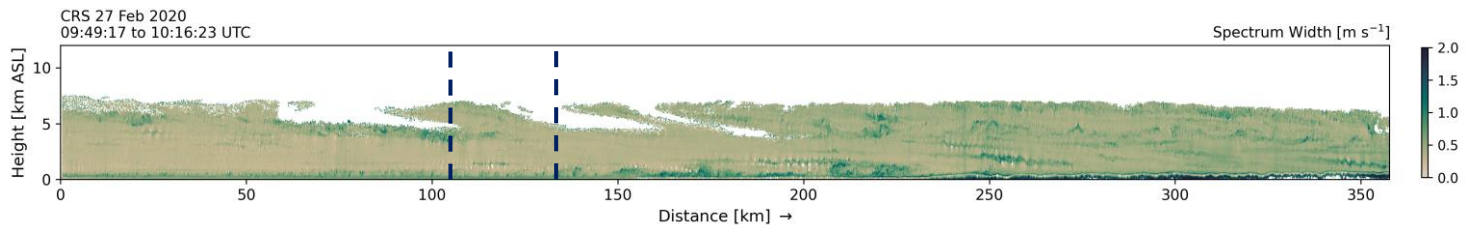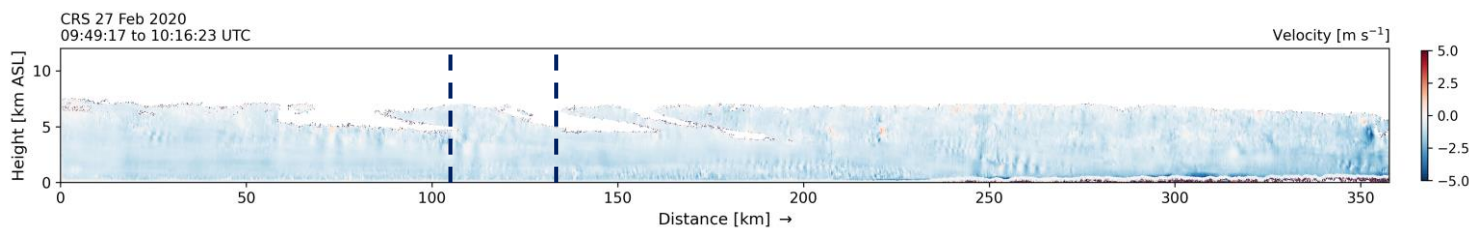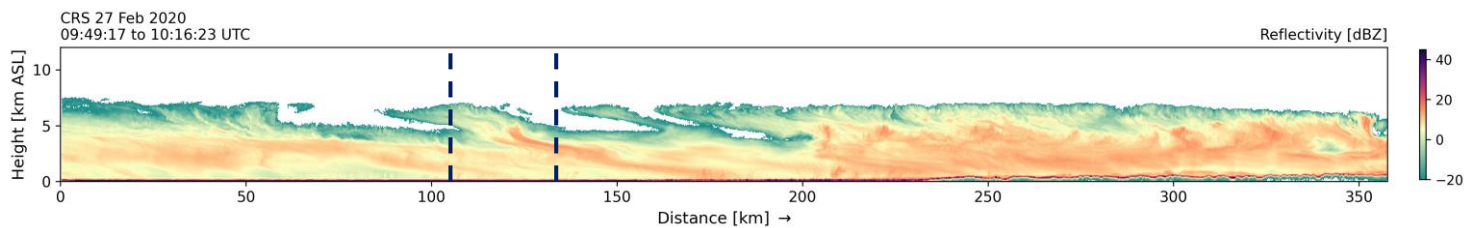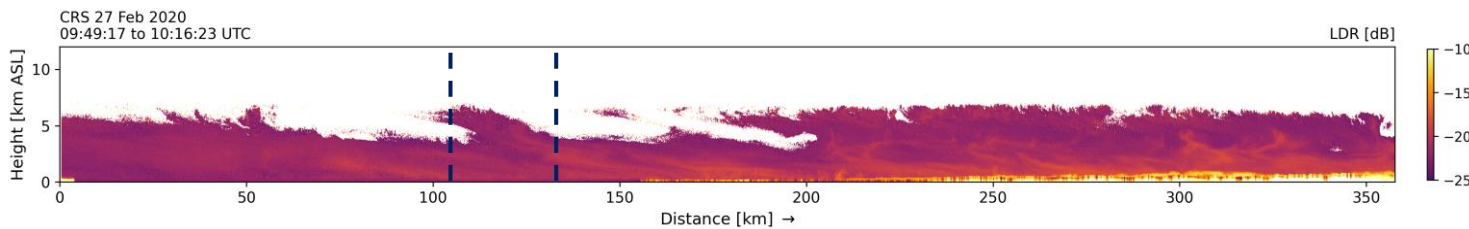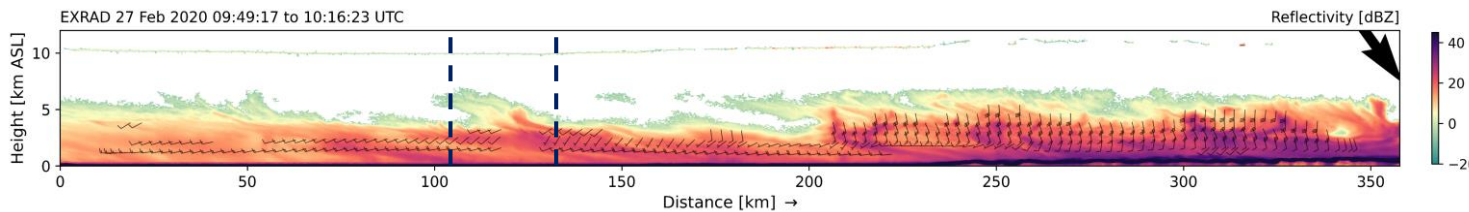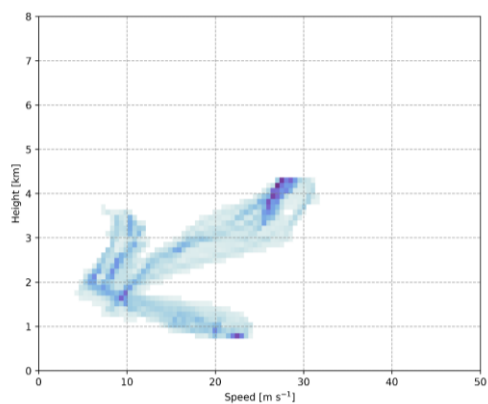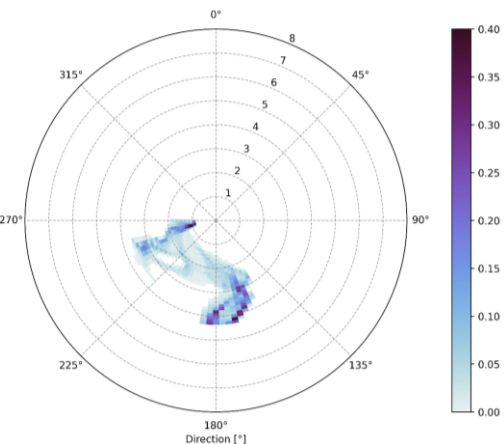

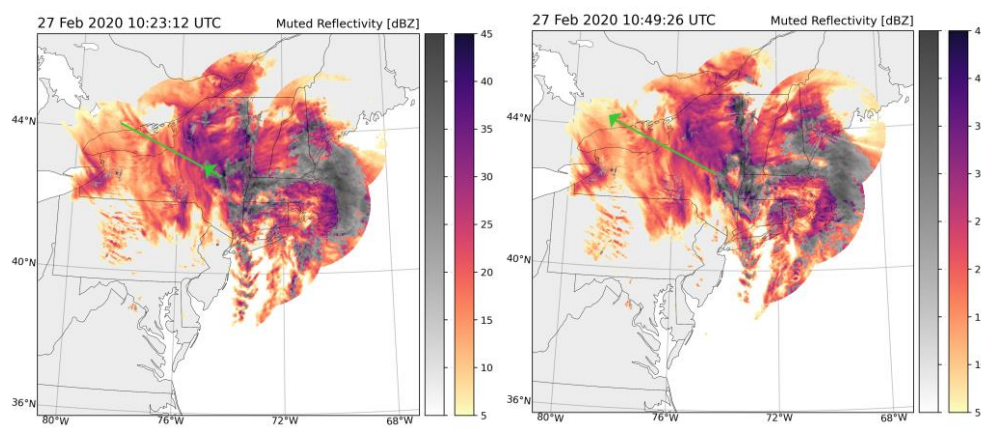

CRS 27 Feb 2020  
10:20:39 to 10:49:32 UTC

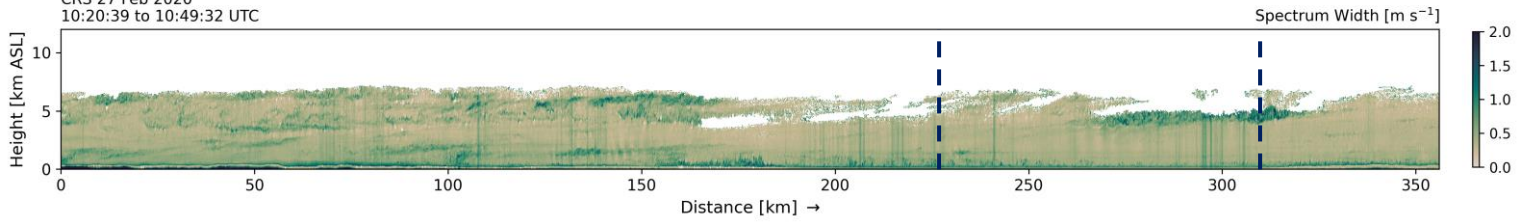

CRS 27 Feb 2020  
10:20:39 to 10:49:32 UTC

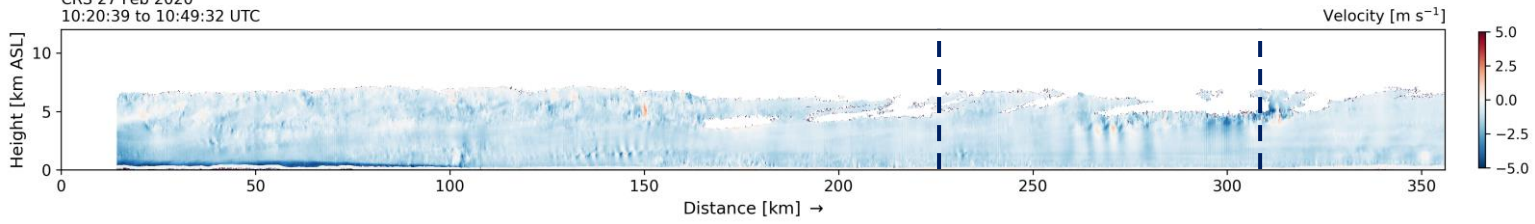

CRS 27 Feb 2020  
10:20:39 to 10:49:32 UTC

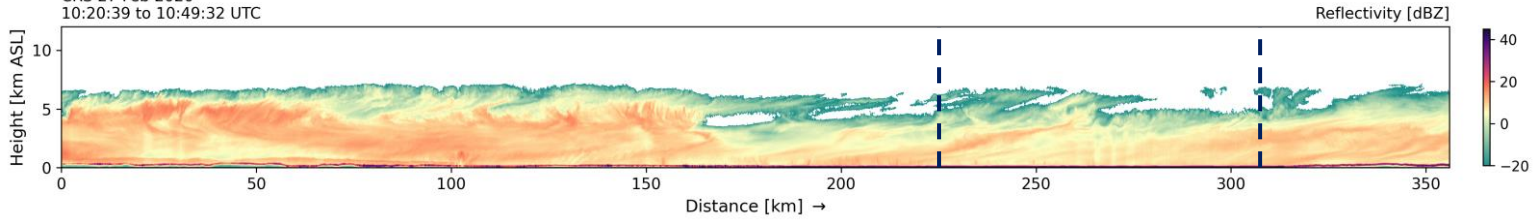

CRS 27 Feb 2020  
10:20:39 to 10:49:32 UTC

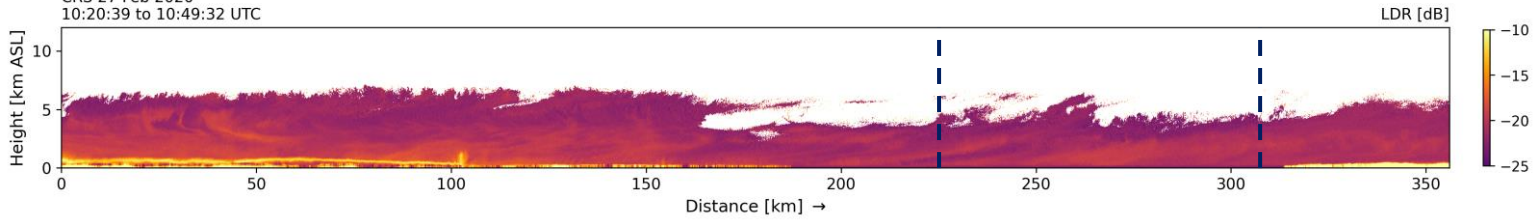

EXRAD 27 Feb 2020 10:20:39 to 10:49:32 UTC

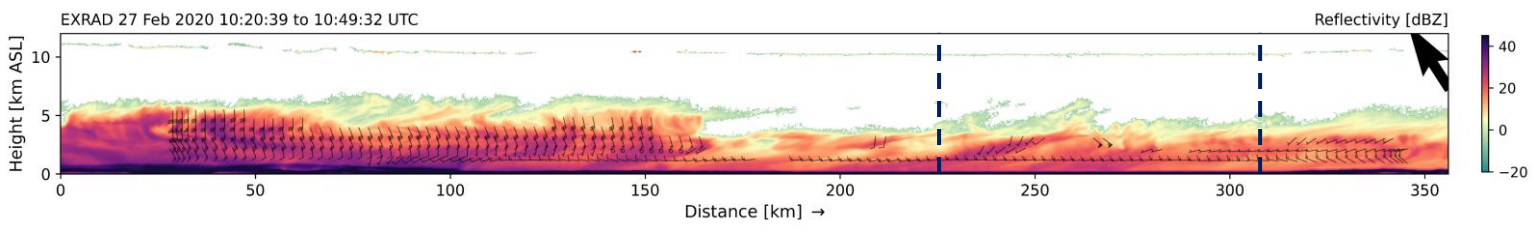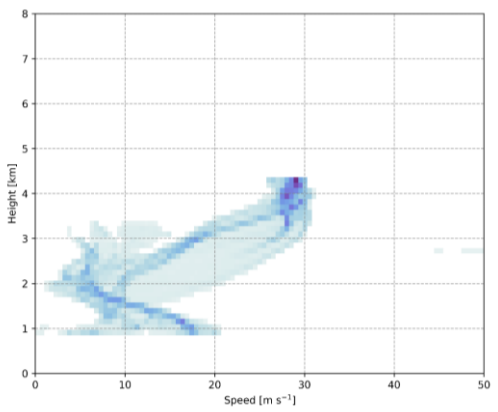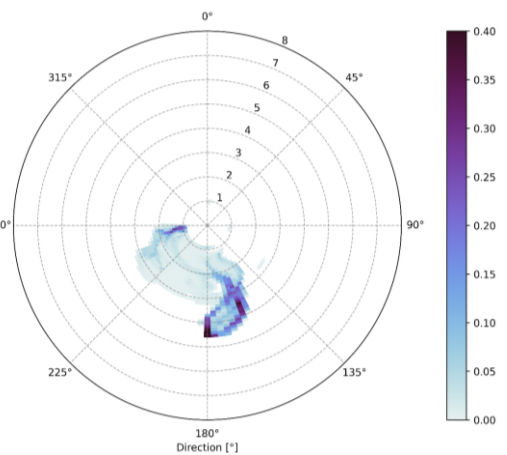



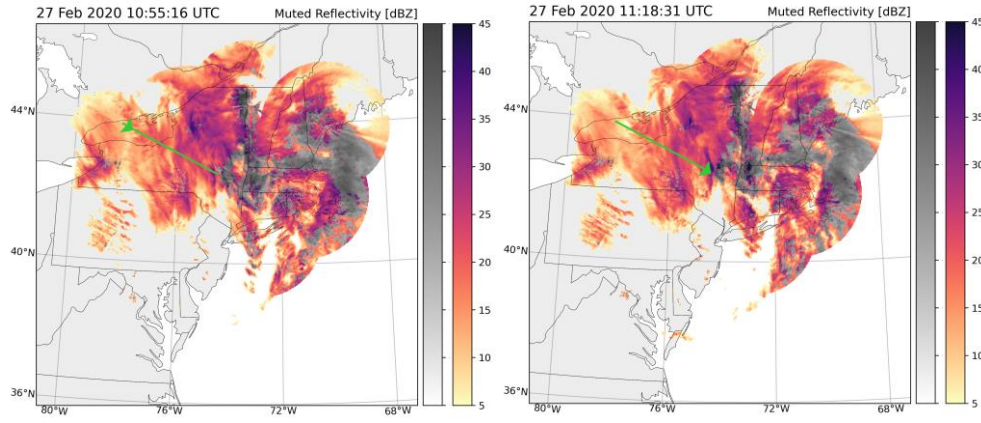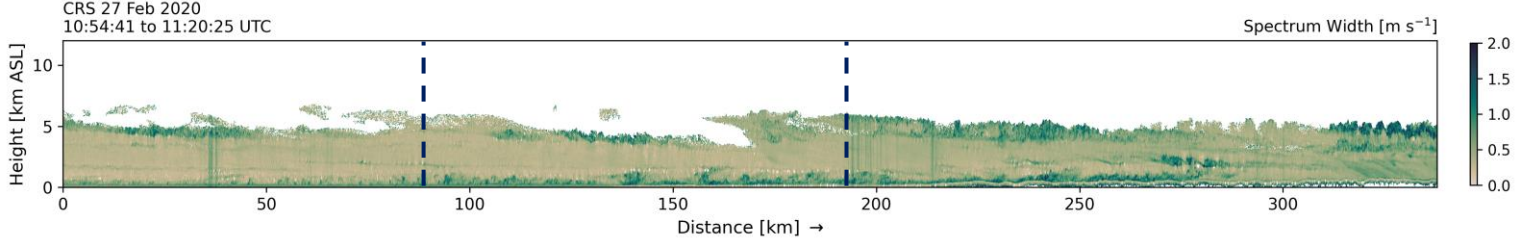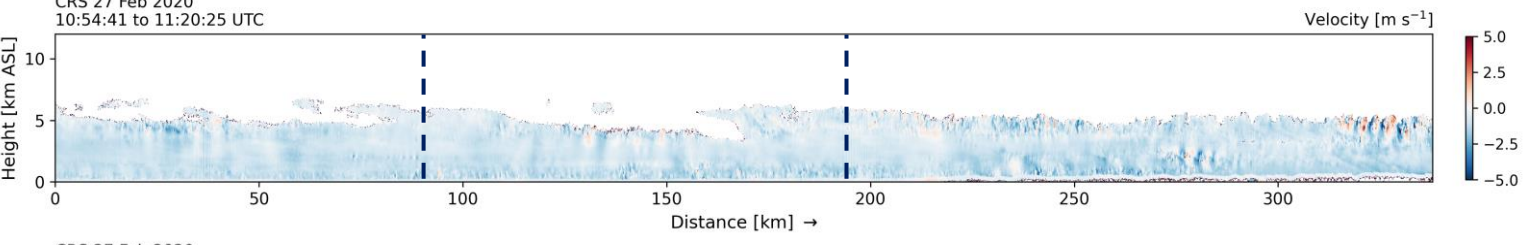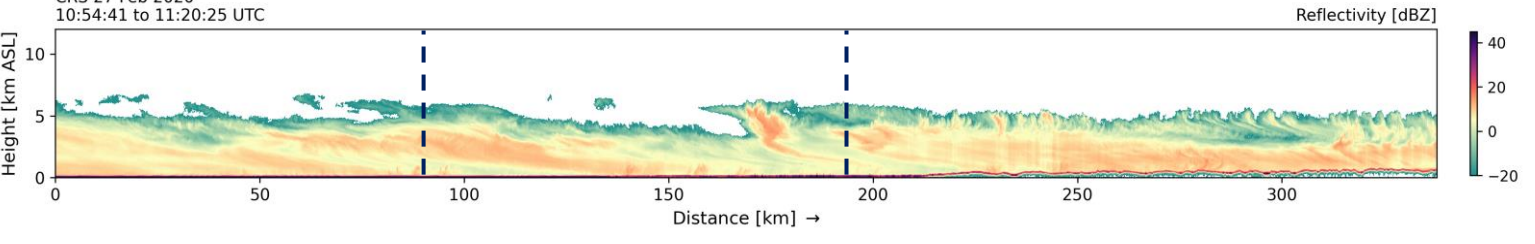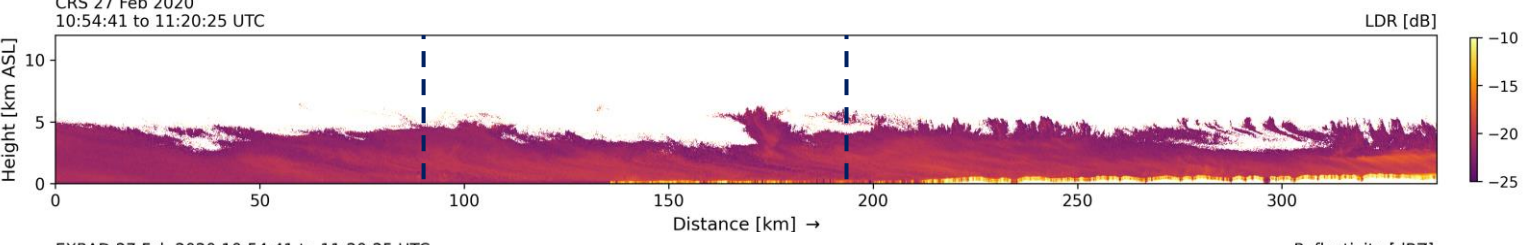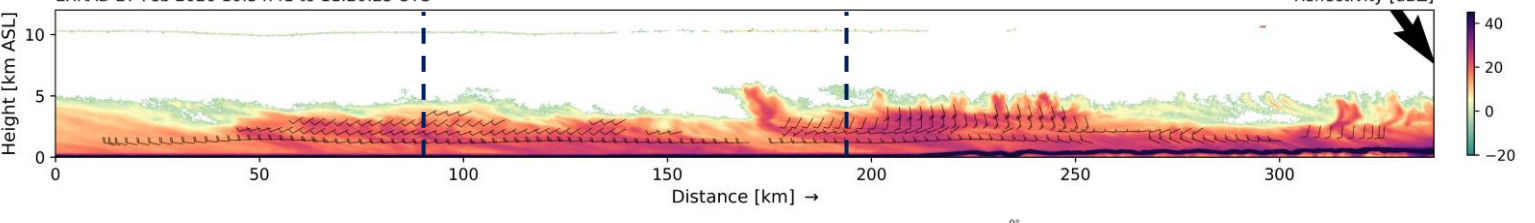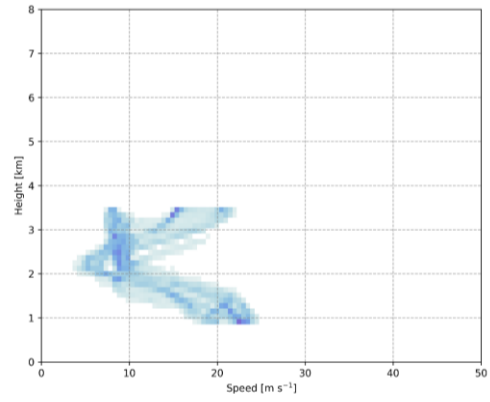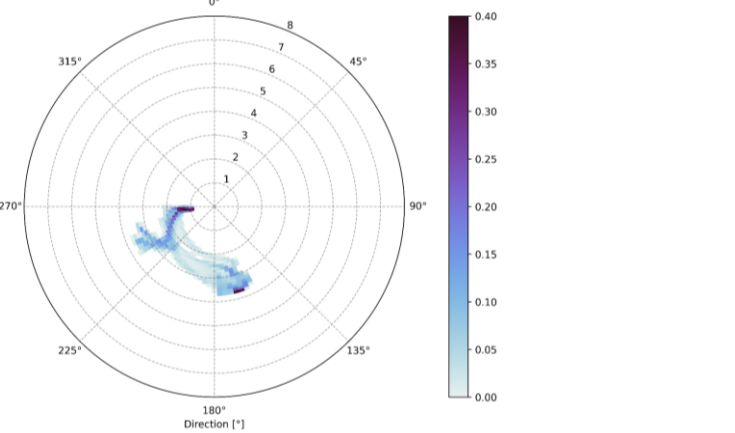

2022

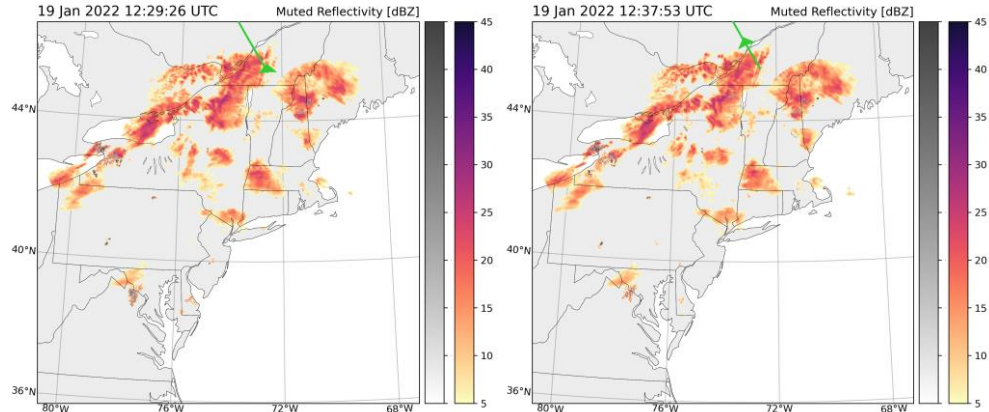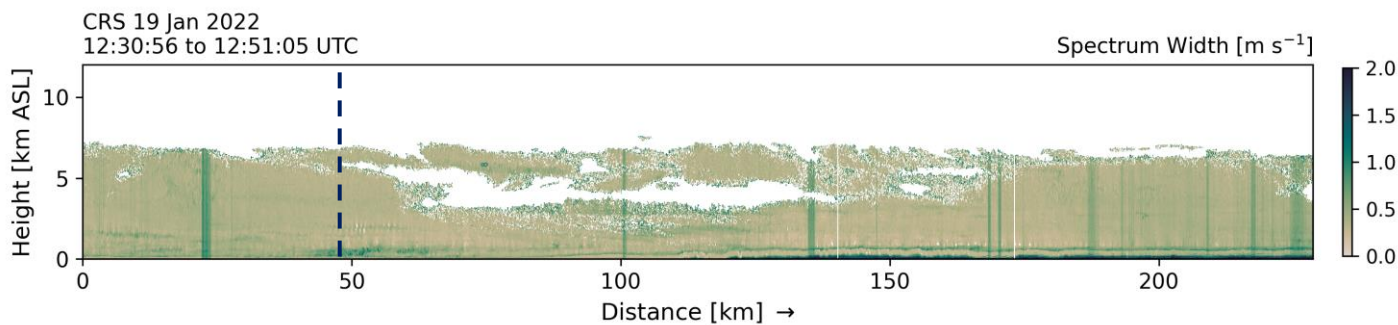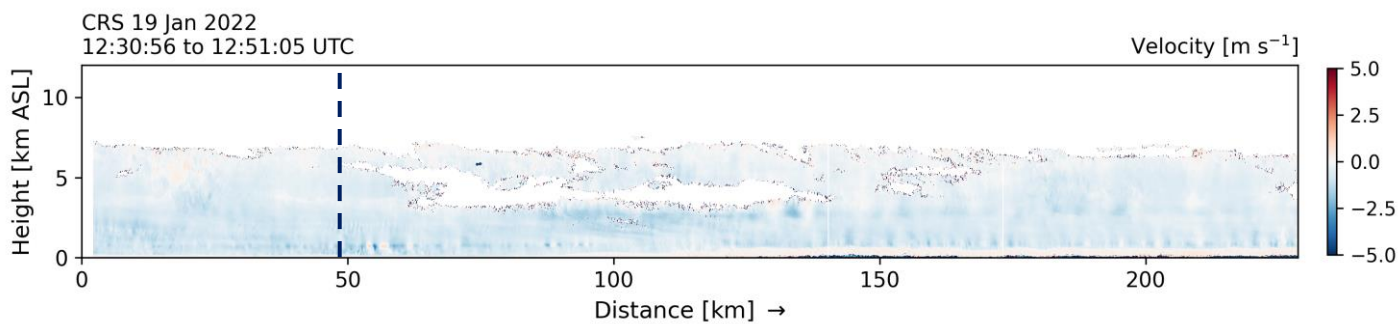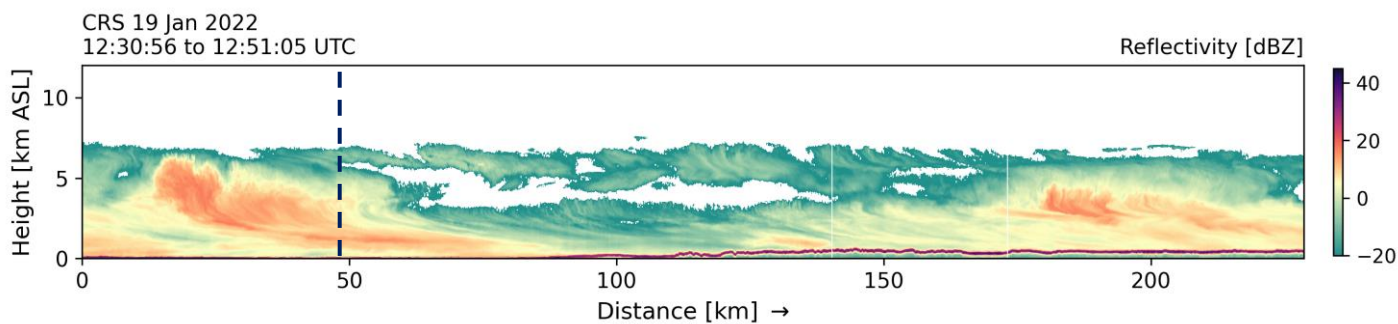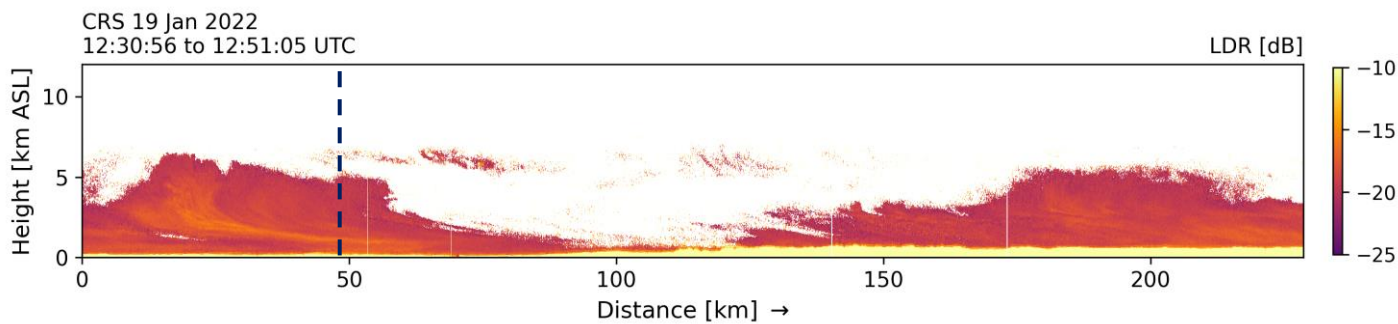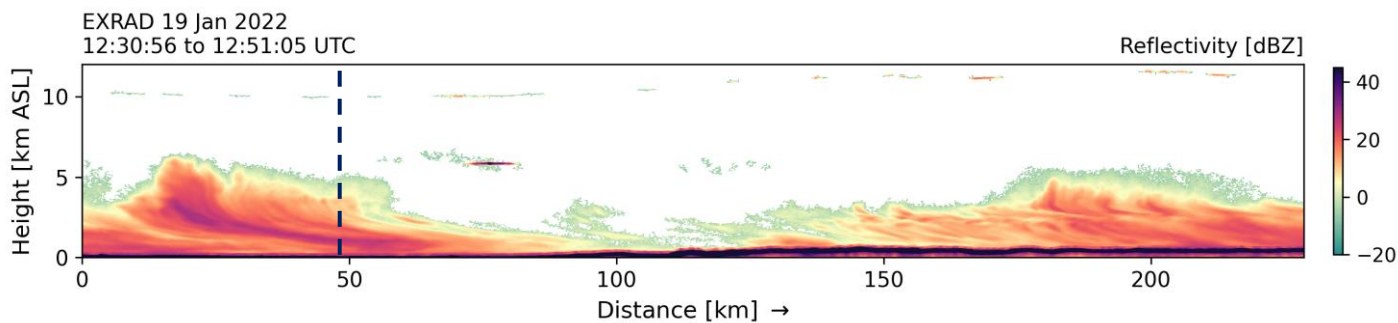



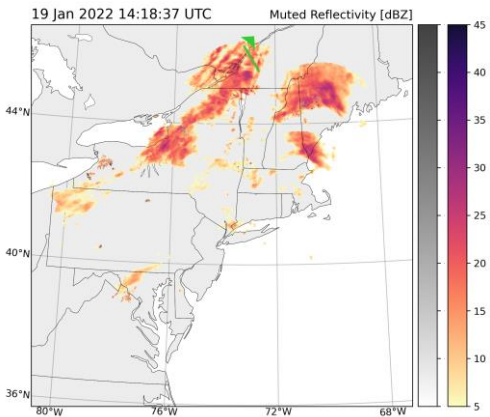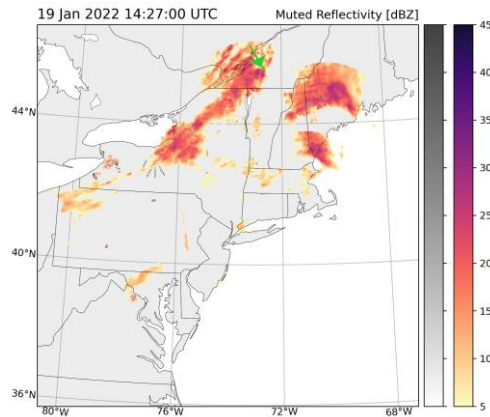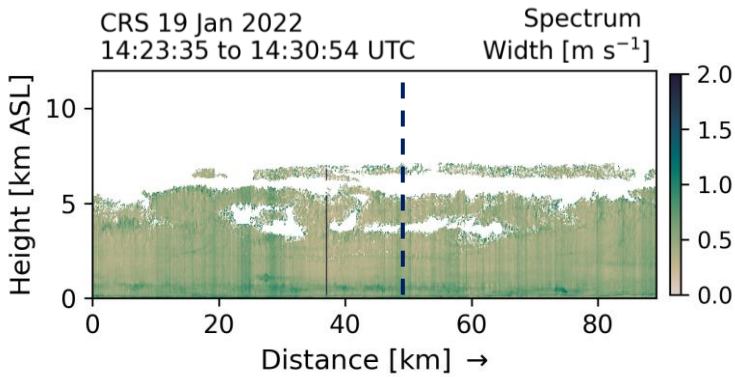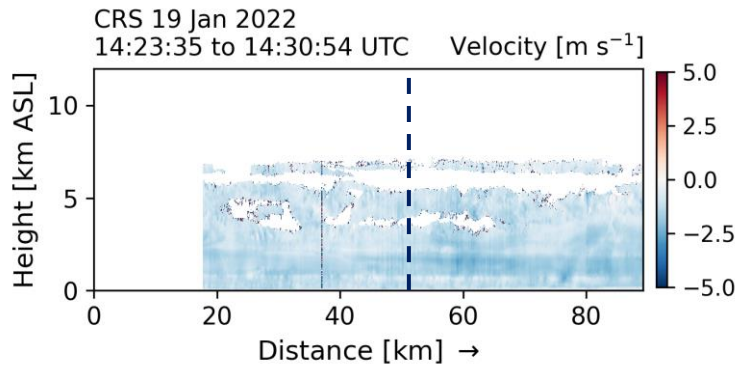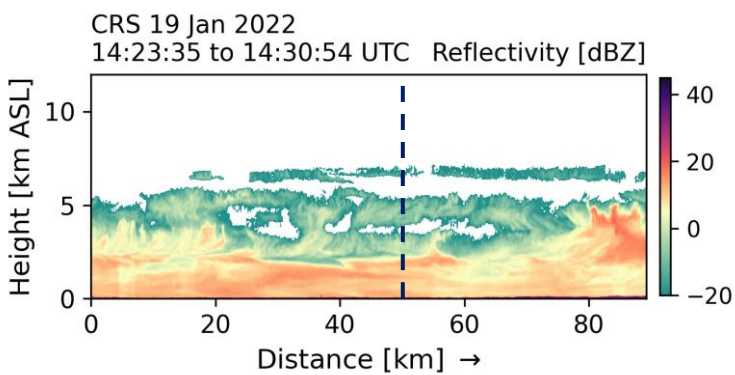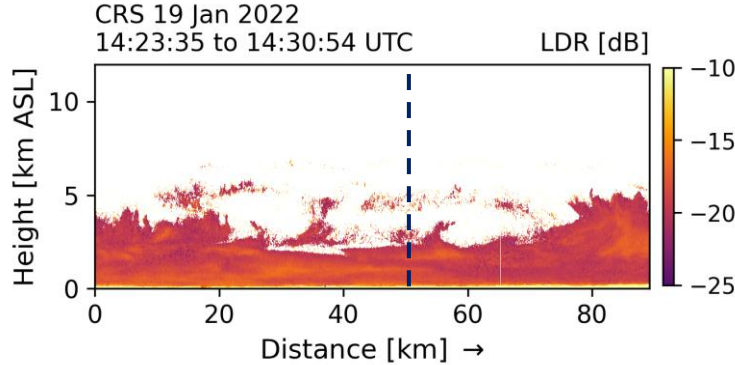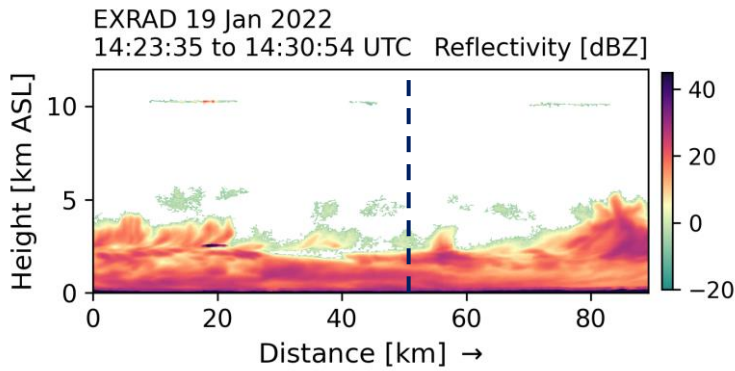

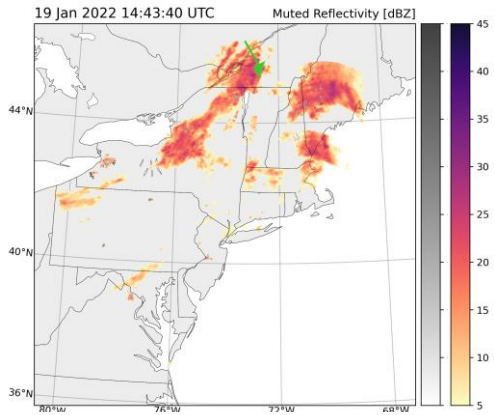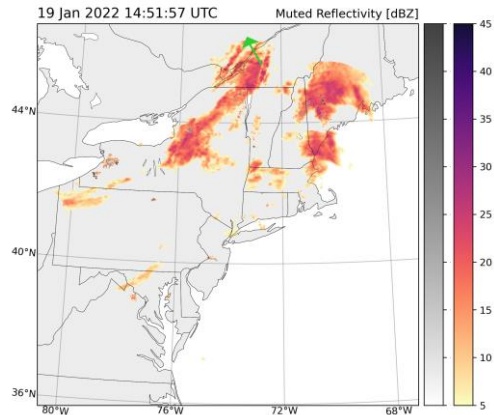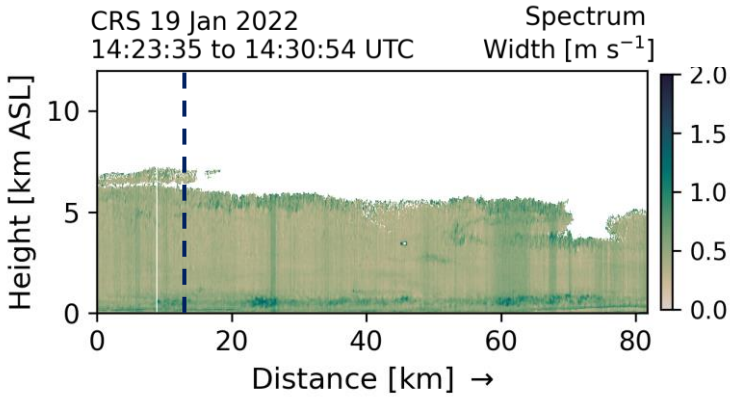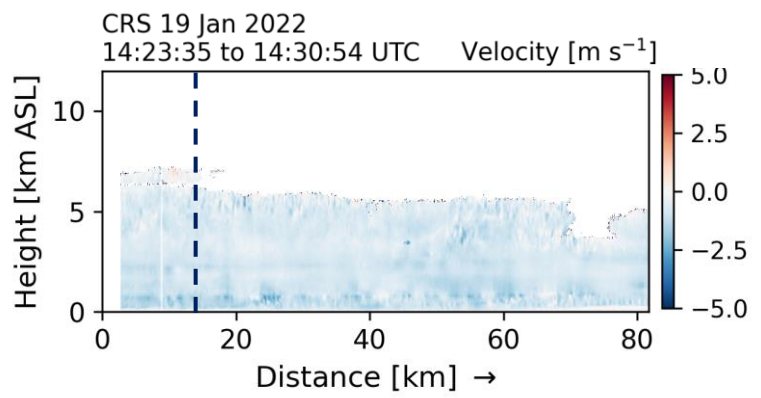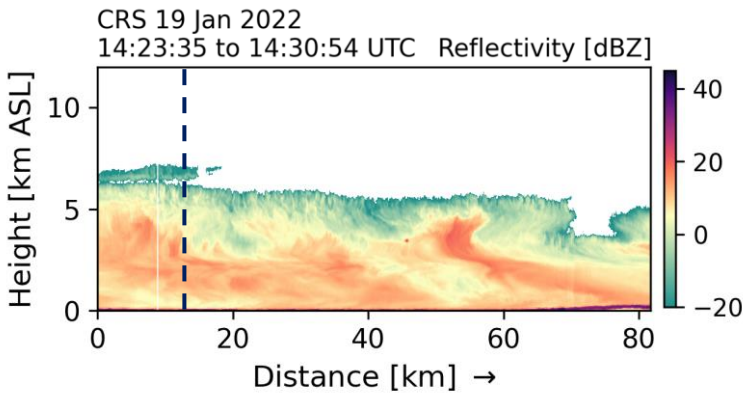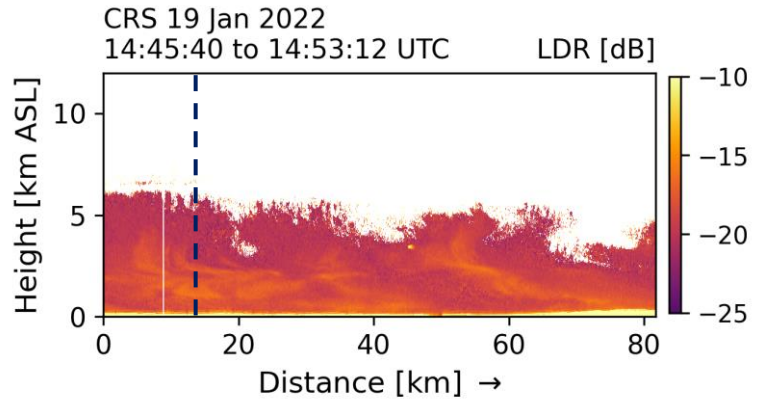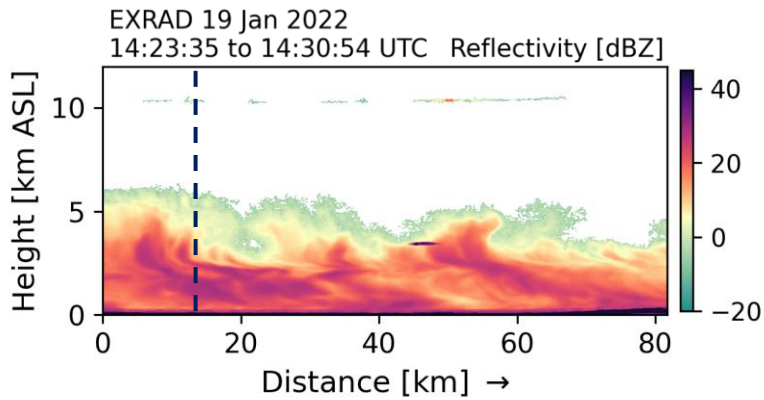

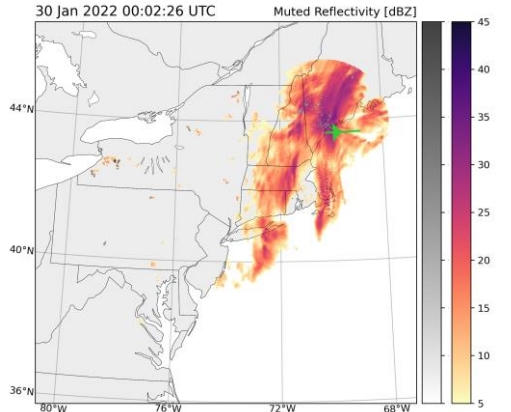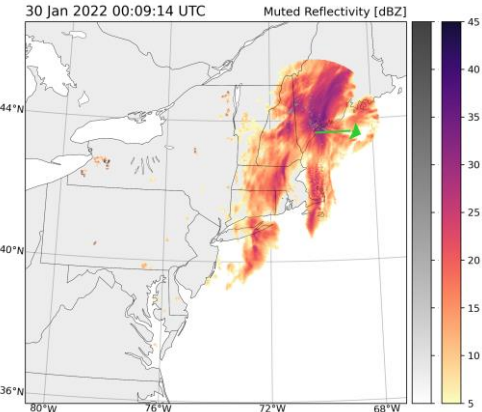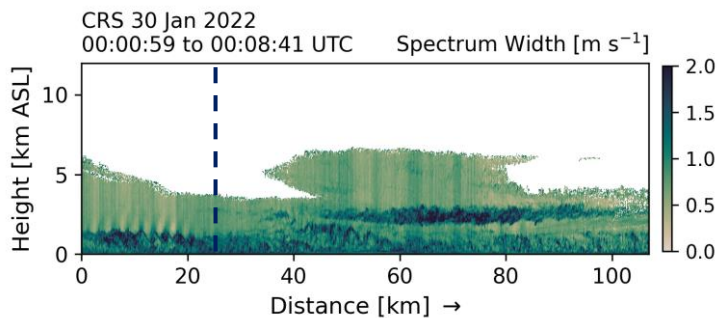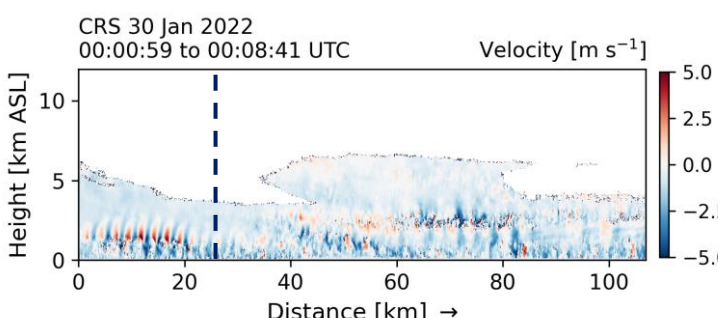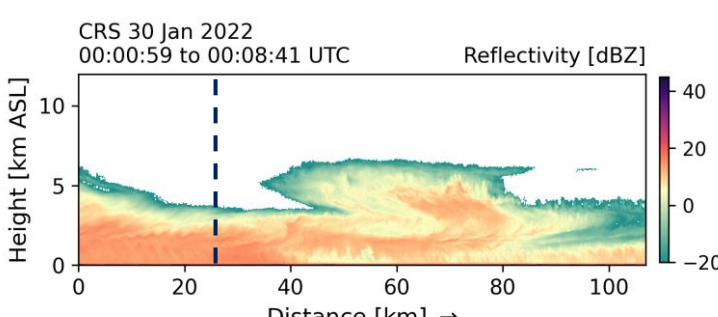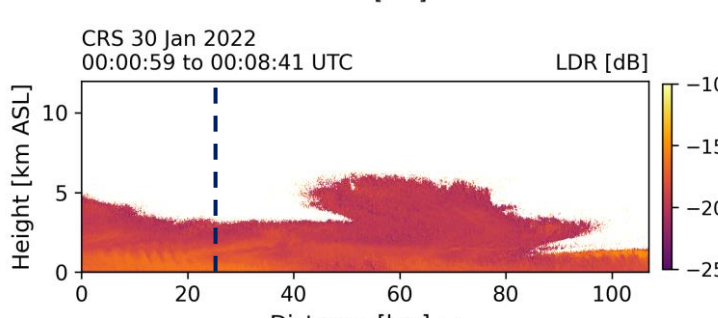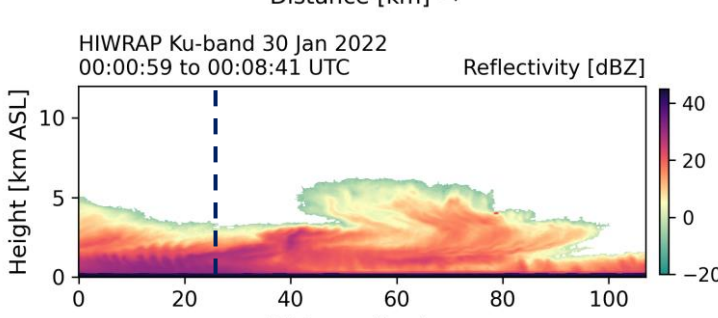



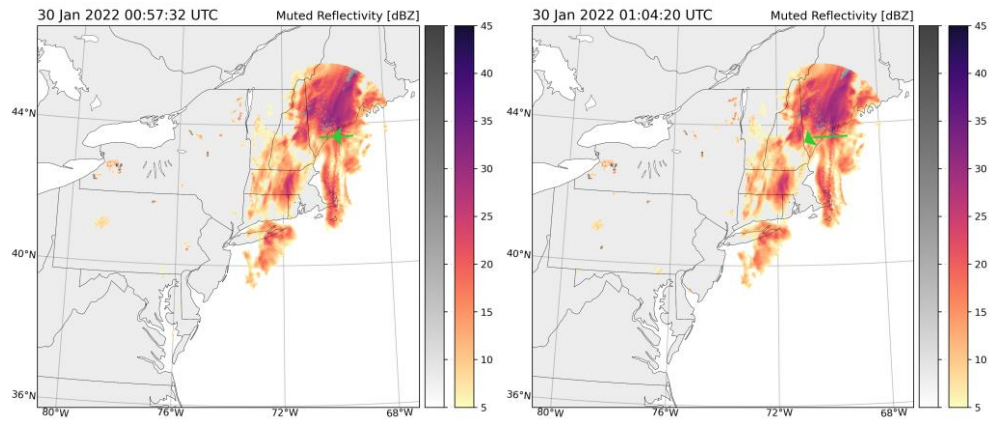

CRS 30 Jan 2022  
00:54:25 to 01:03:47 UTC Spectrum Width [ $\text{m s}^{-1}$ ]

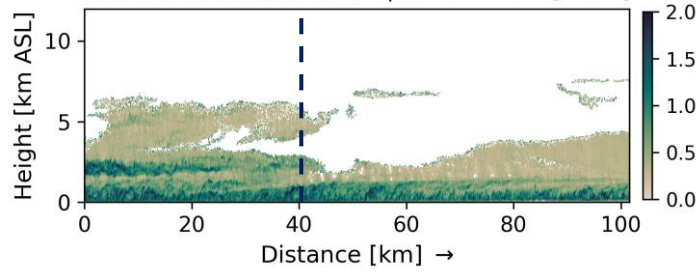

CRS 30 Jan 2022  
00:54:25 to 01:03:47 UTC Velocity [ $\text{m s}^{-1}$ ]

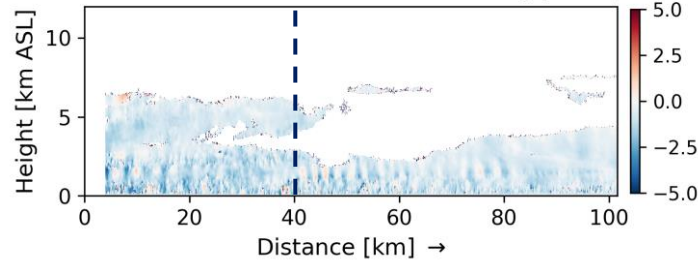

CRS 30 Jan 2022  
00:54:25 to 01:03:47 UTC Reflectivity [dBZ]

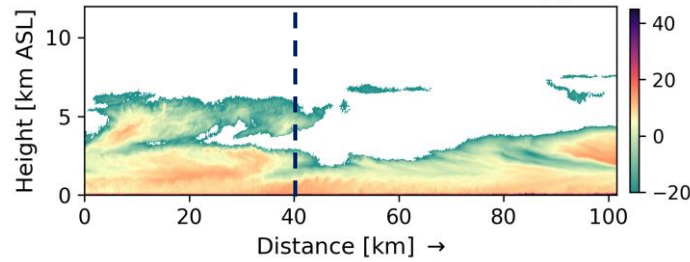

CRS 30 Jan 2022  
00:54:25 to 01:03:47 UTC LDR [dB]

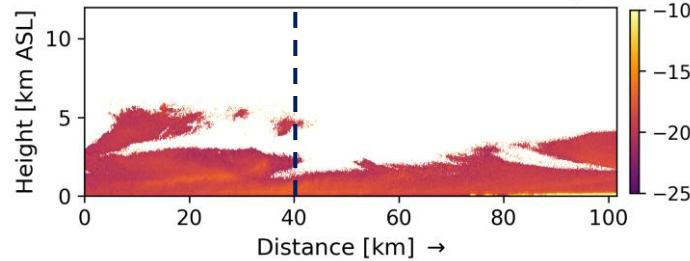

HIWRAP Ku-band 30 Jan 2022  
00:54:25 to 01:03:47 UTC Reflectivity [dBZ]

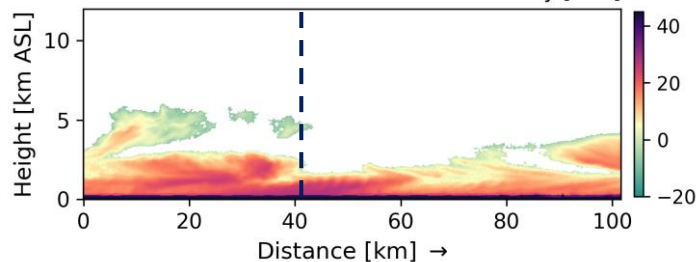

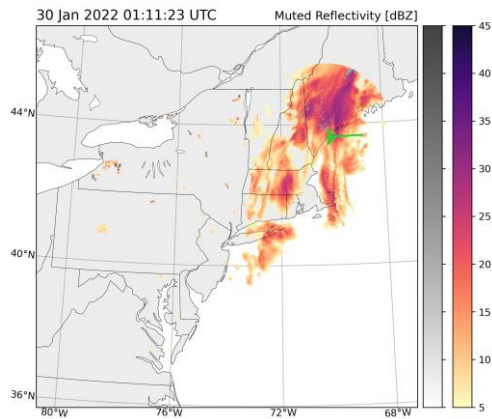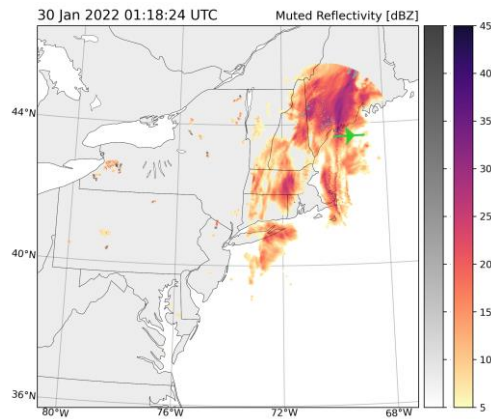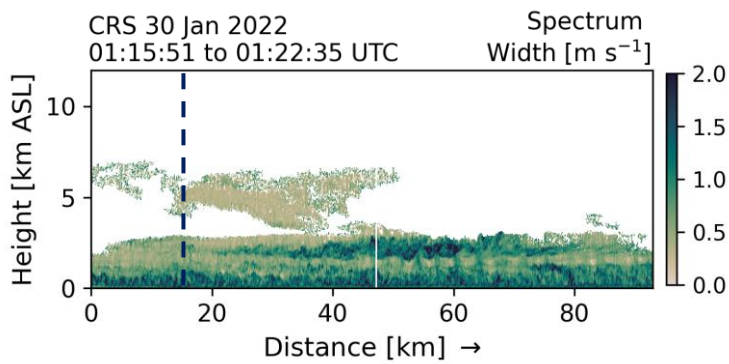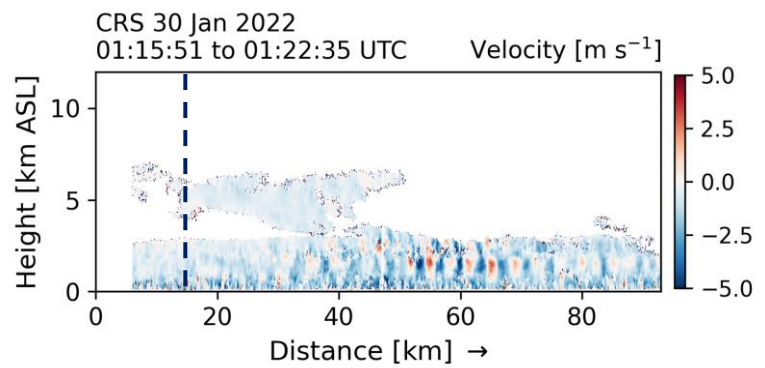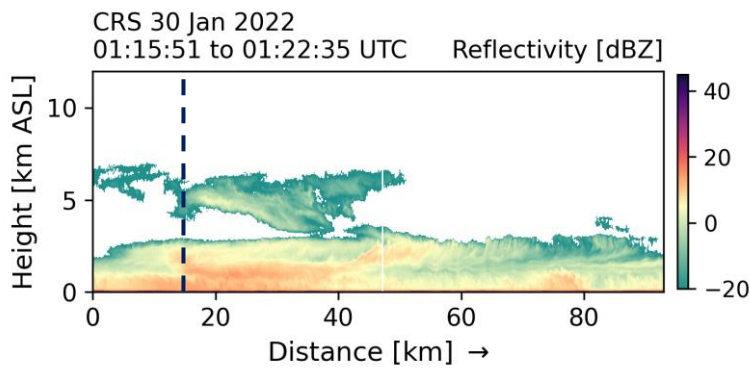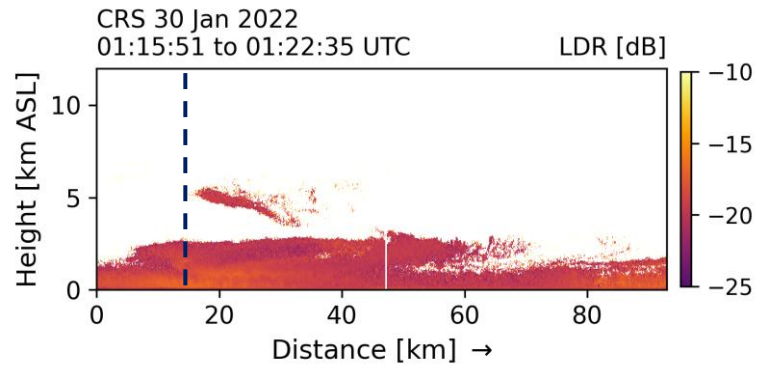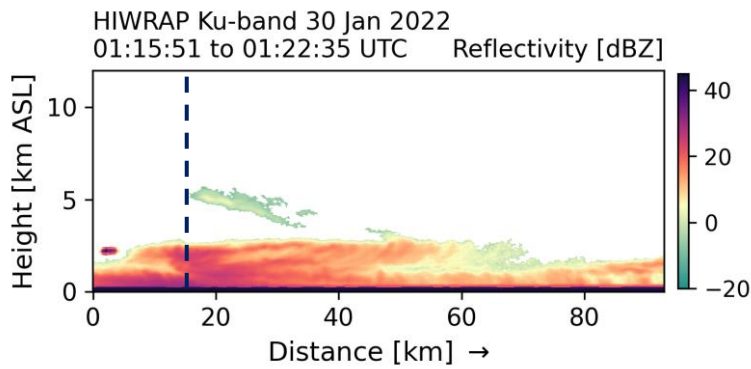

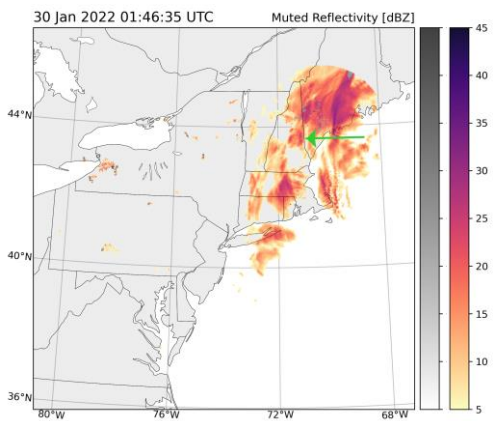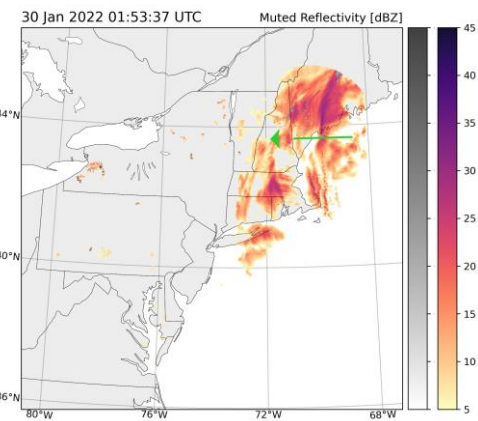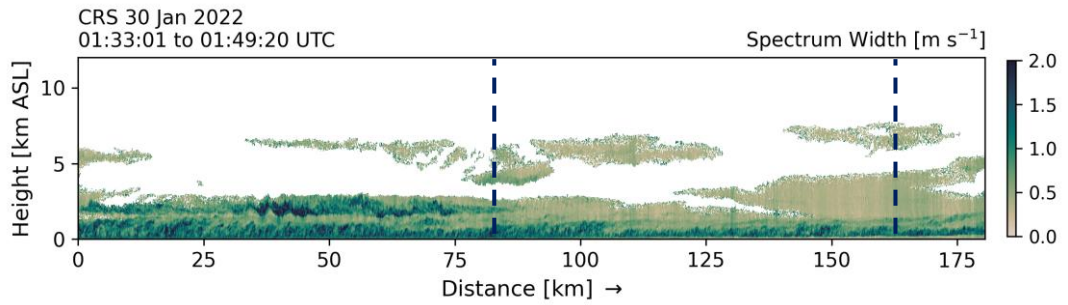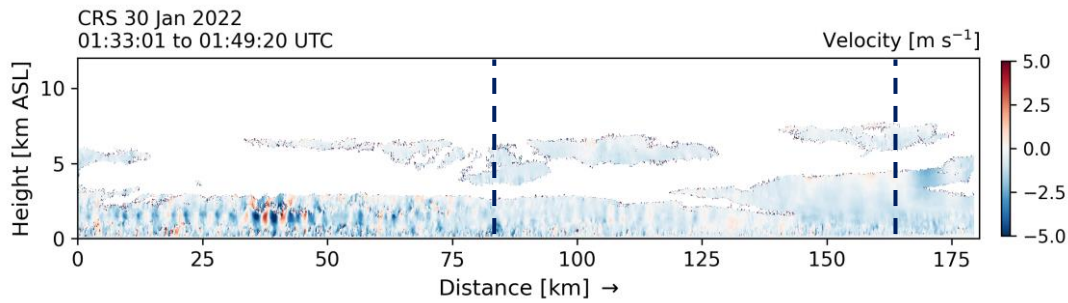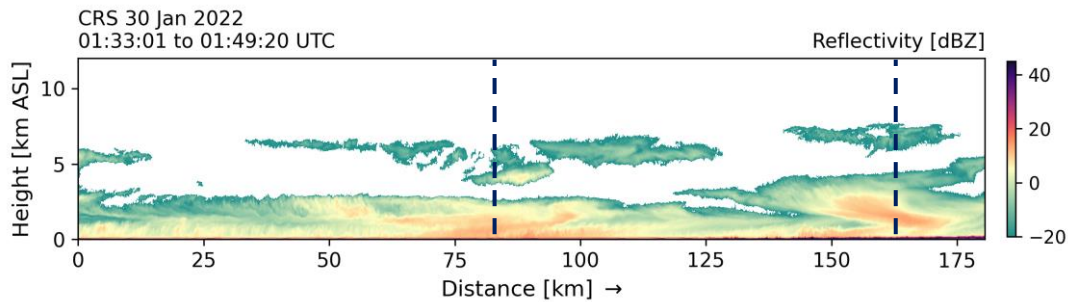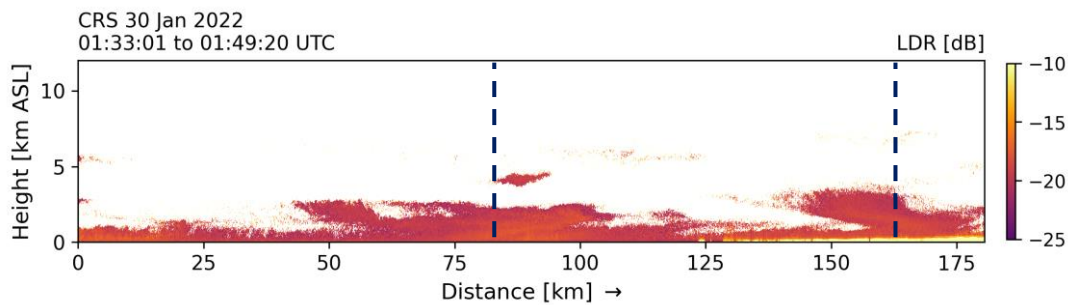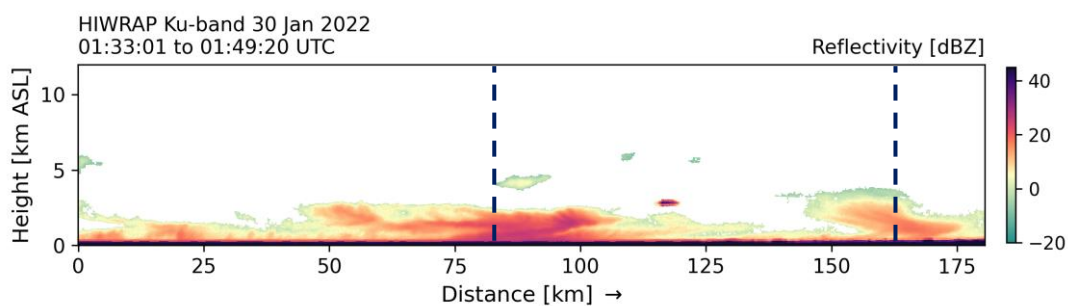



03 Feb 2022 15:34:50 UTC

Muted Reflectivity [dBZ]

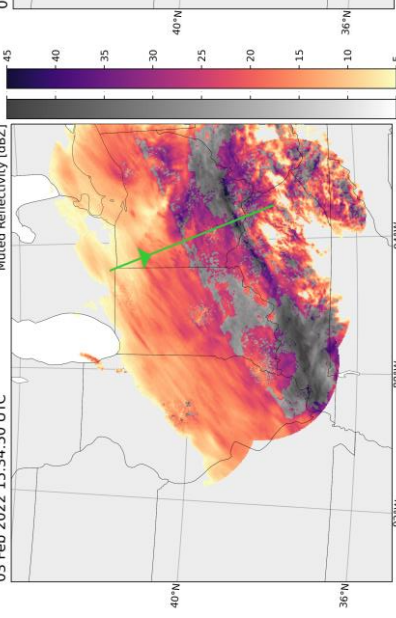

03 Feb 2022 15:41:48 UTC

Muted Reflectivity [dBZ]

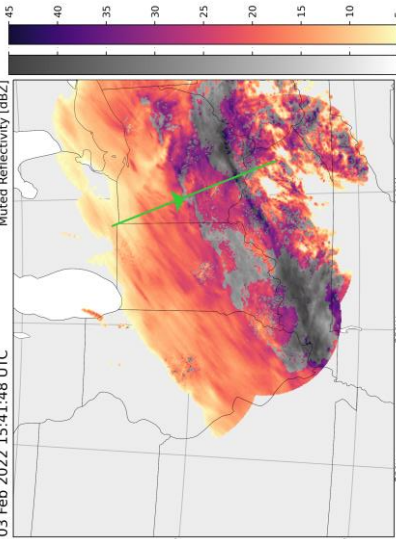

CRS 03 Feb 2022  
15:28:18 to 16:04:46 UTC

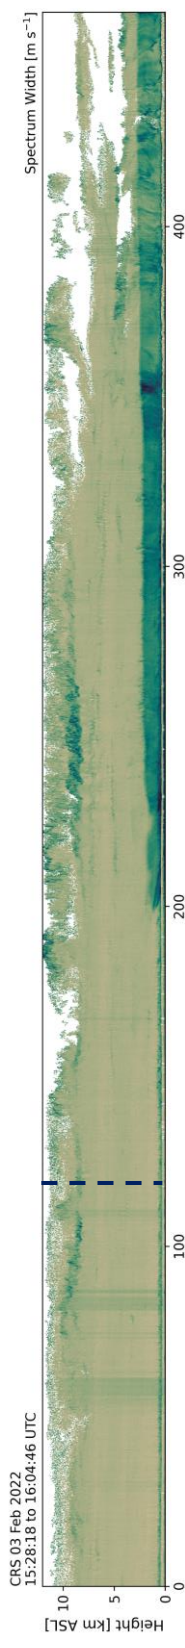

CRS 03 Feb 2022  
15:28:18 to 16:04:46 UTC

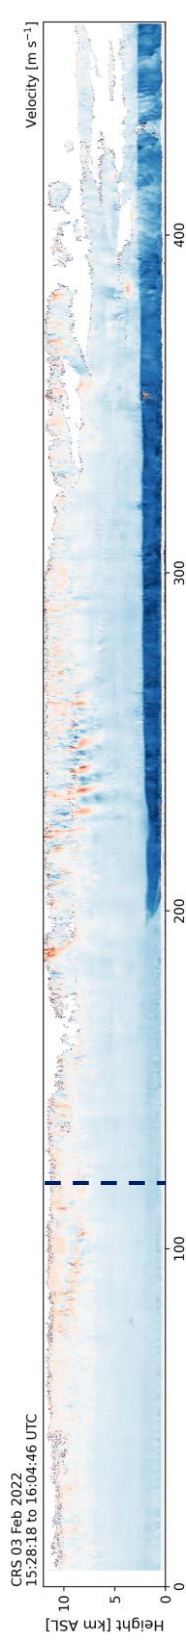

CRS 03 Feb 2022  
15:28:18 to 16:04:46 UTC

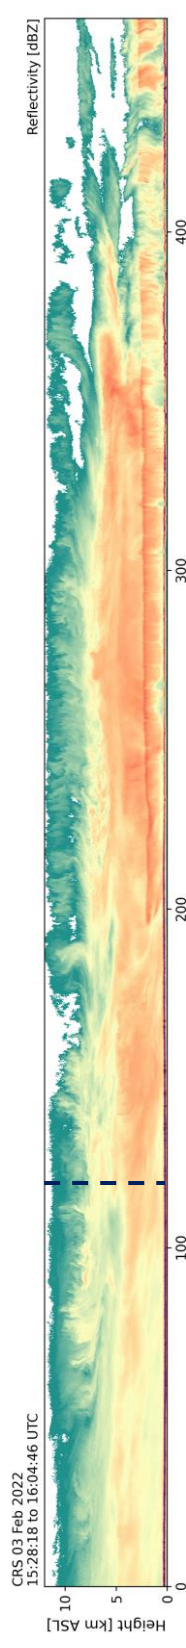

CRS 03 Feb 2022  
15:28:18 to 16:04:46 UTC

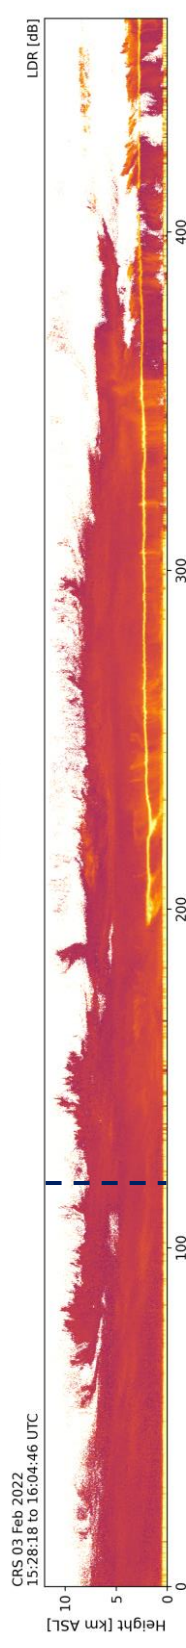

HIWRAP Ku-band 03 Feb 2022  
15:28:18 to 16:04:46 UTC

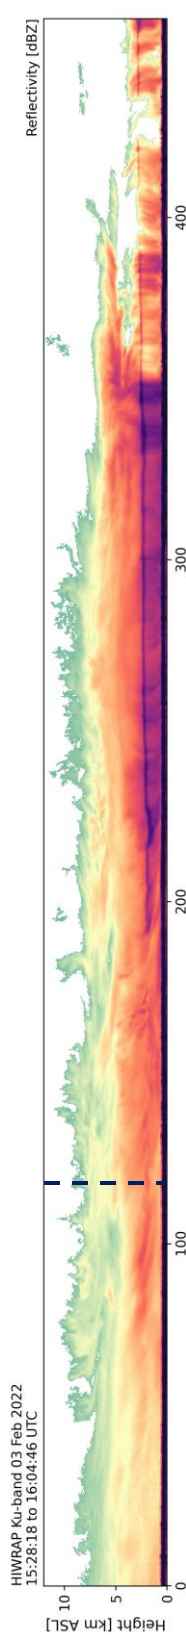

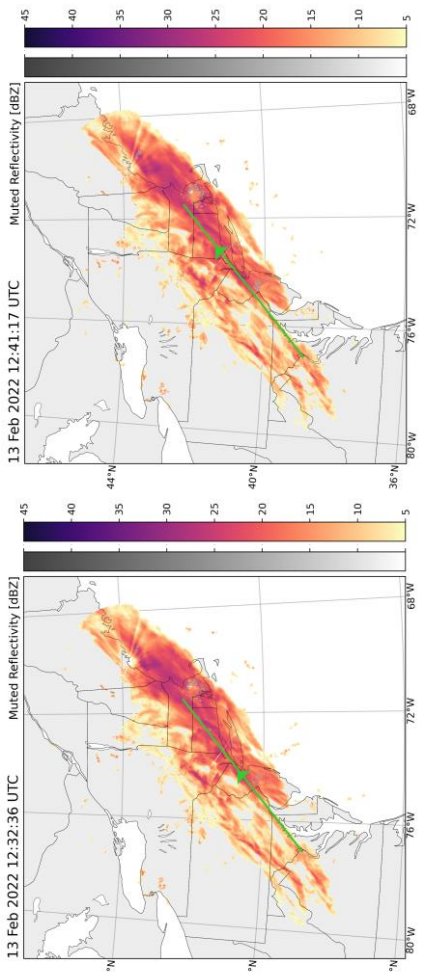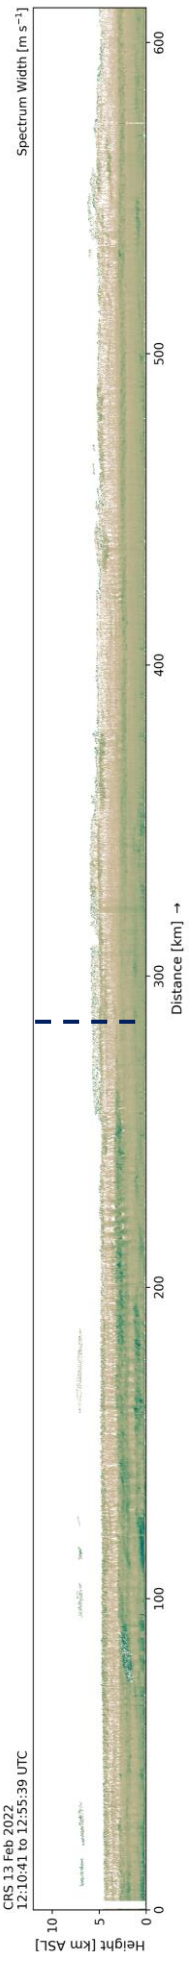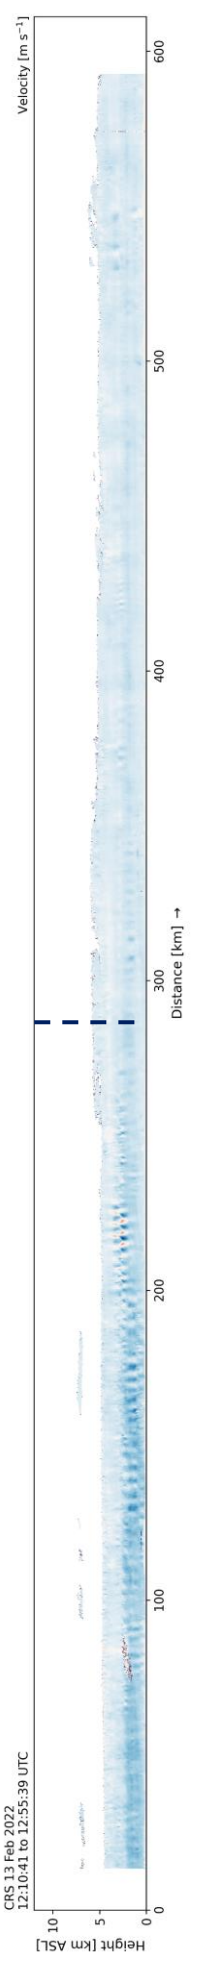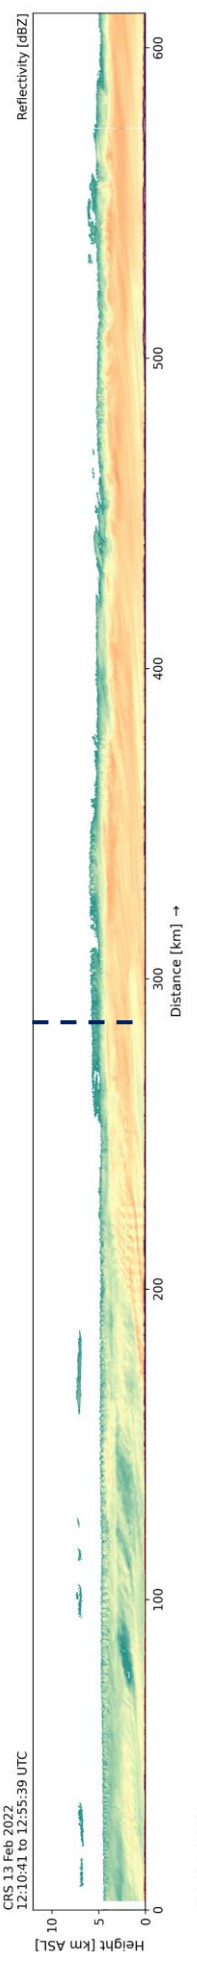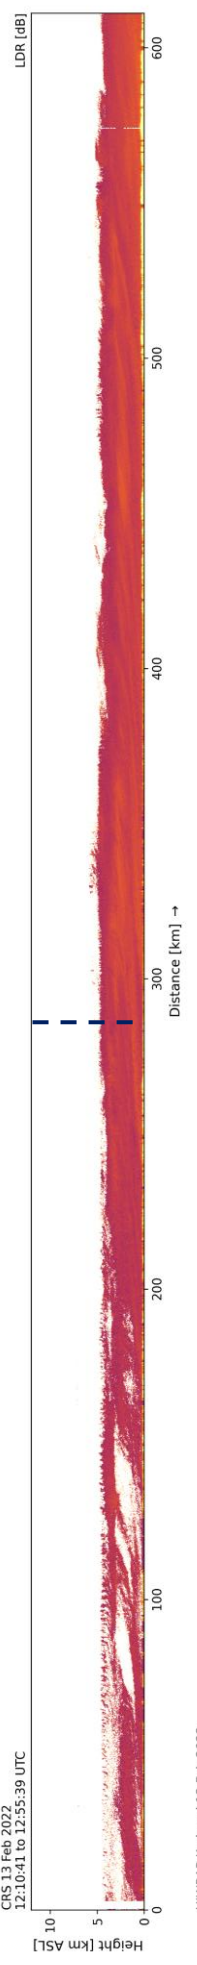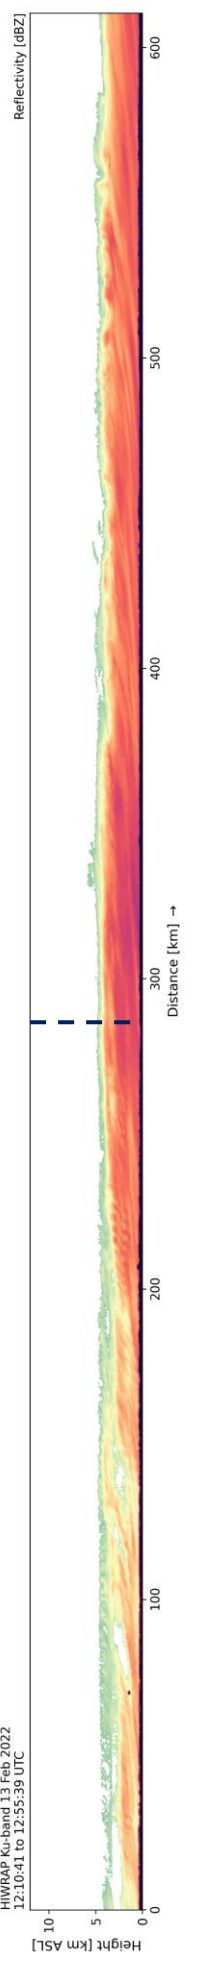



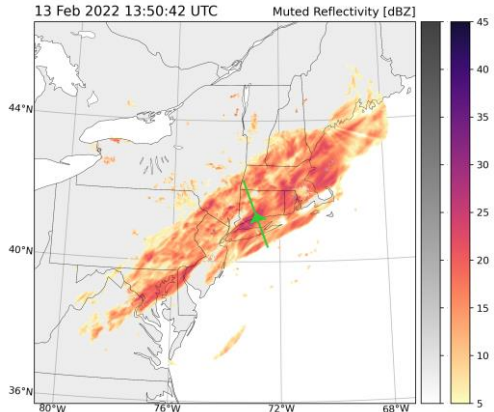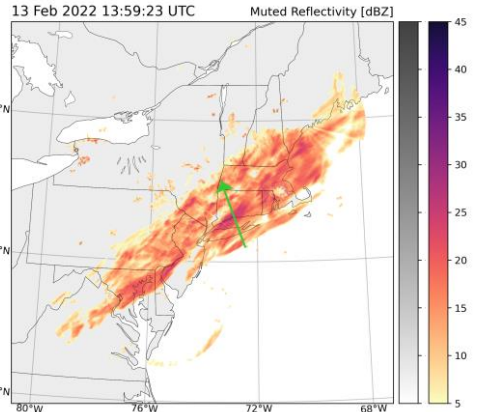

CRS 13 Feb 2022  
13:43:44 to 14:02:13 UTC

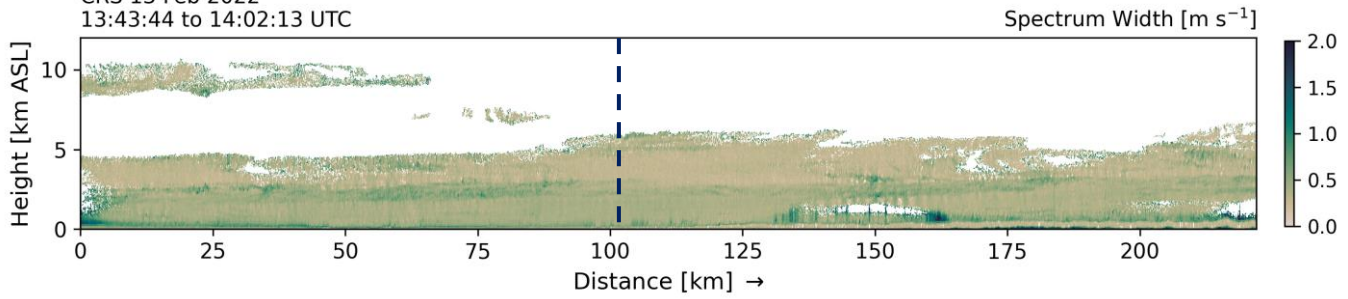

CRS 13 Feb 2022  
13:43:44 to 14:02:13 UTC

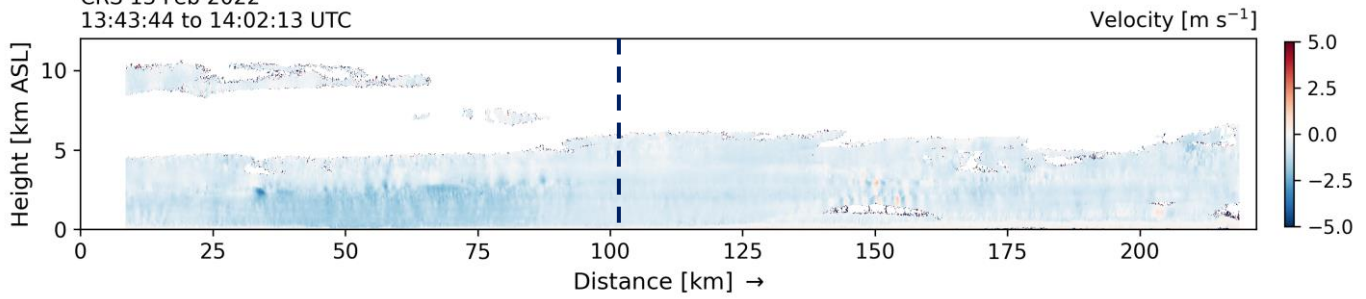

CRS 13 Feb 2022  
13:43:44 to 14:02:13 UTC

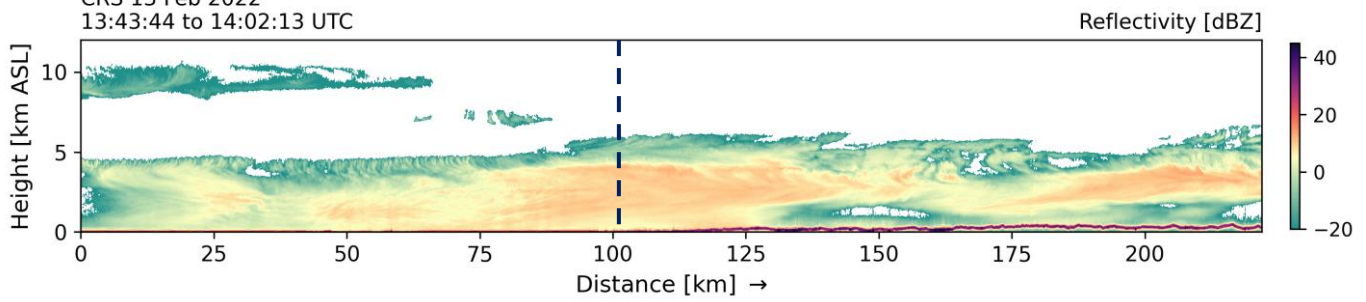

CRS 13 Feb 2022  
13:43:44 to 14:02:13 UTC

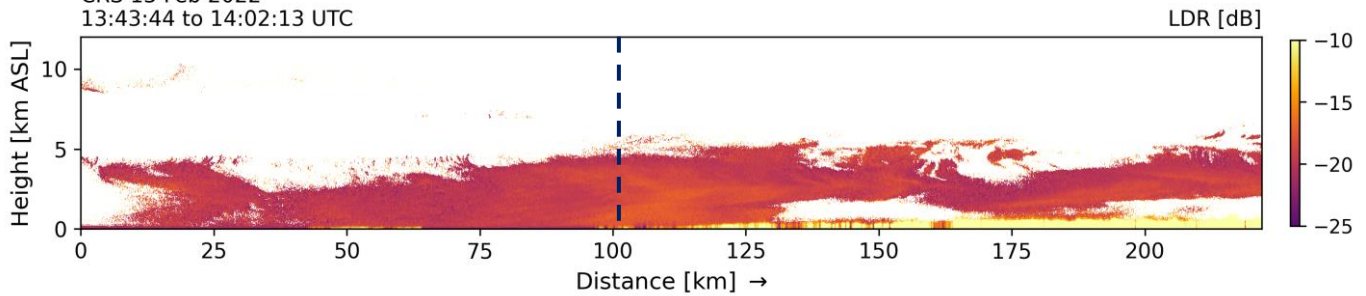

HIWRAP Ku-band 13 Feb 2022  
13:43:44 to 14:02:13 UTC

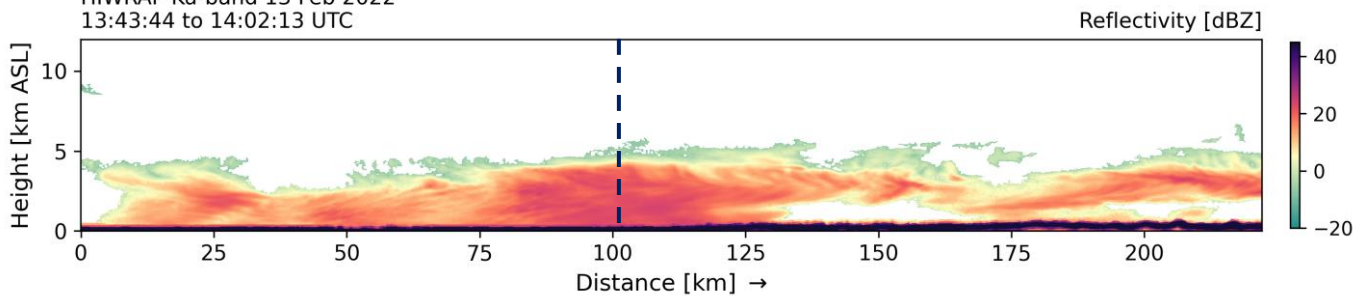

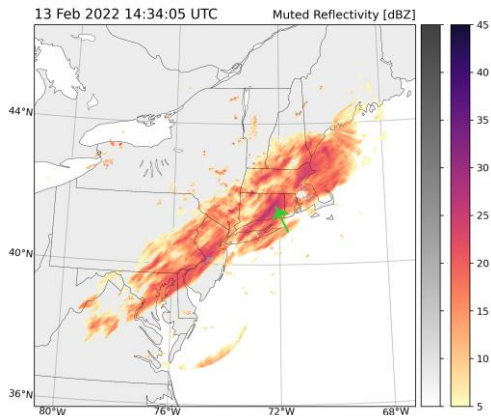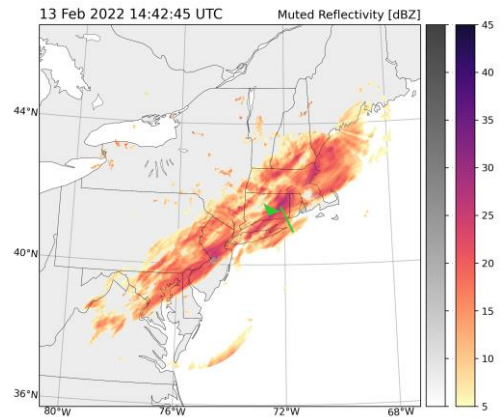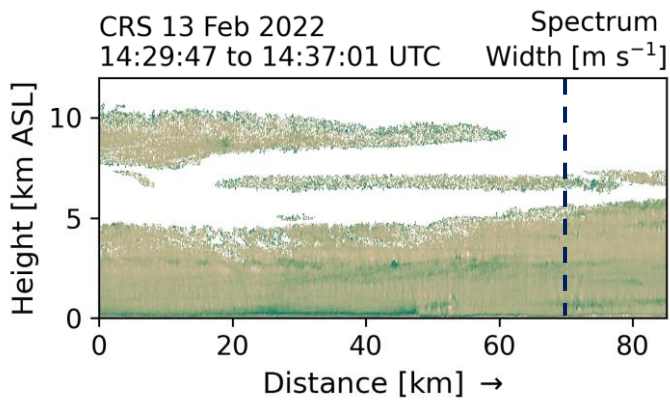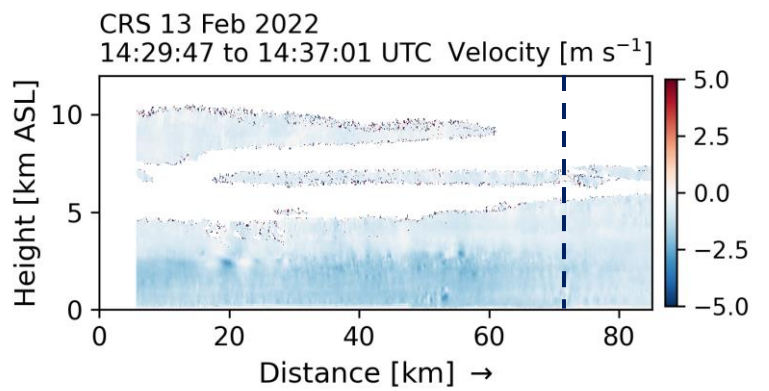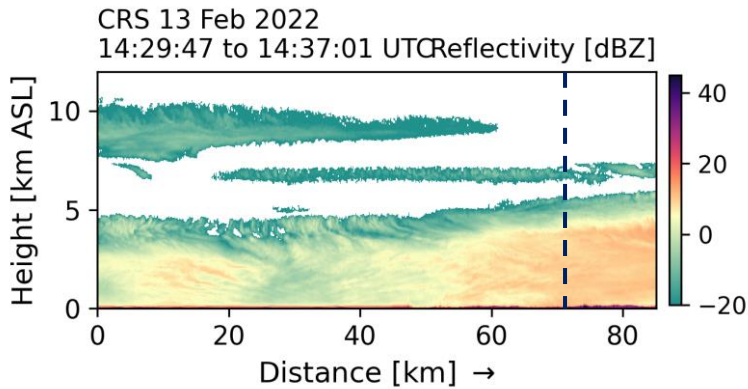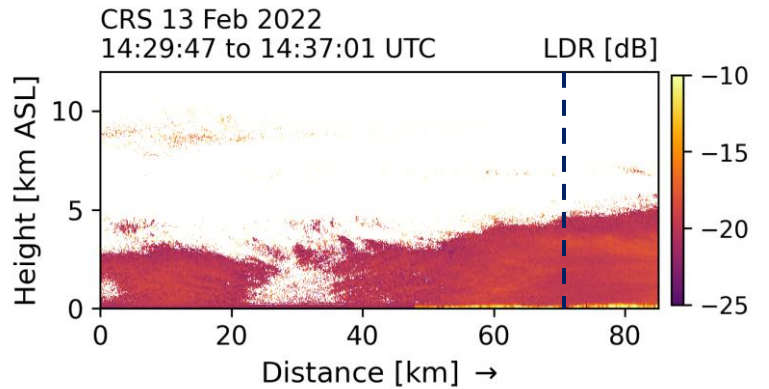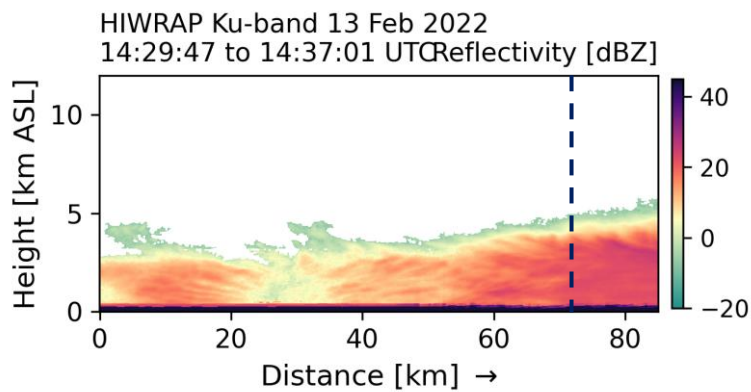



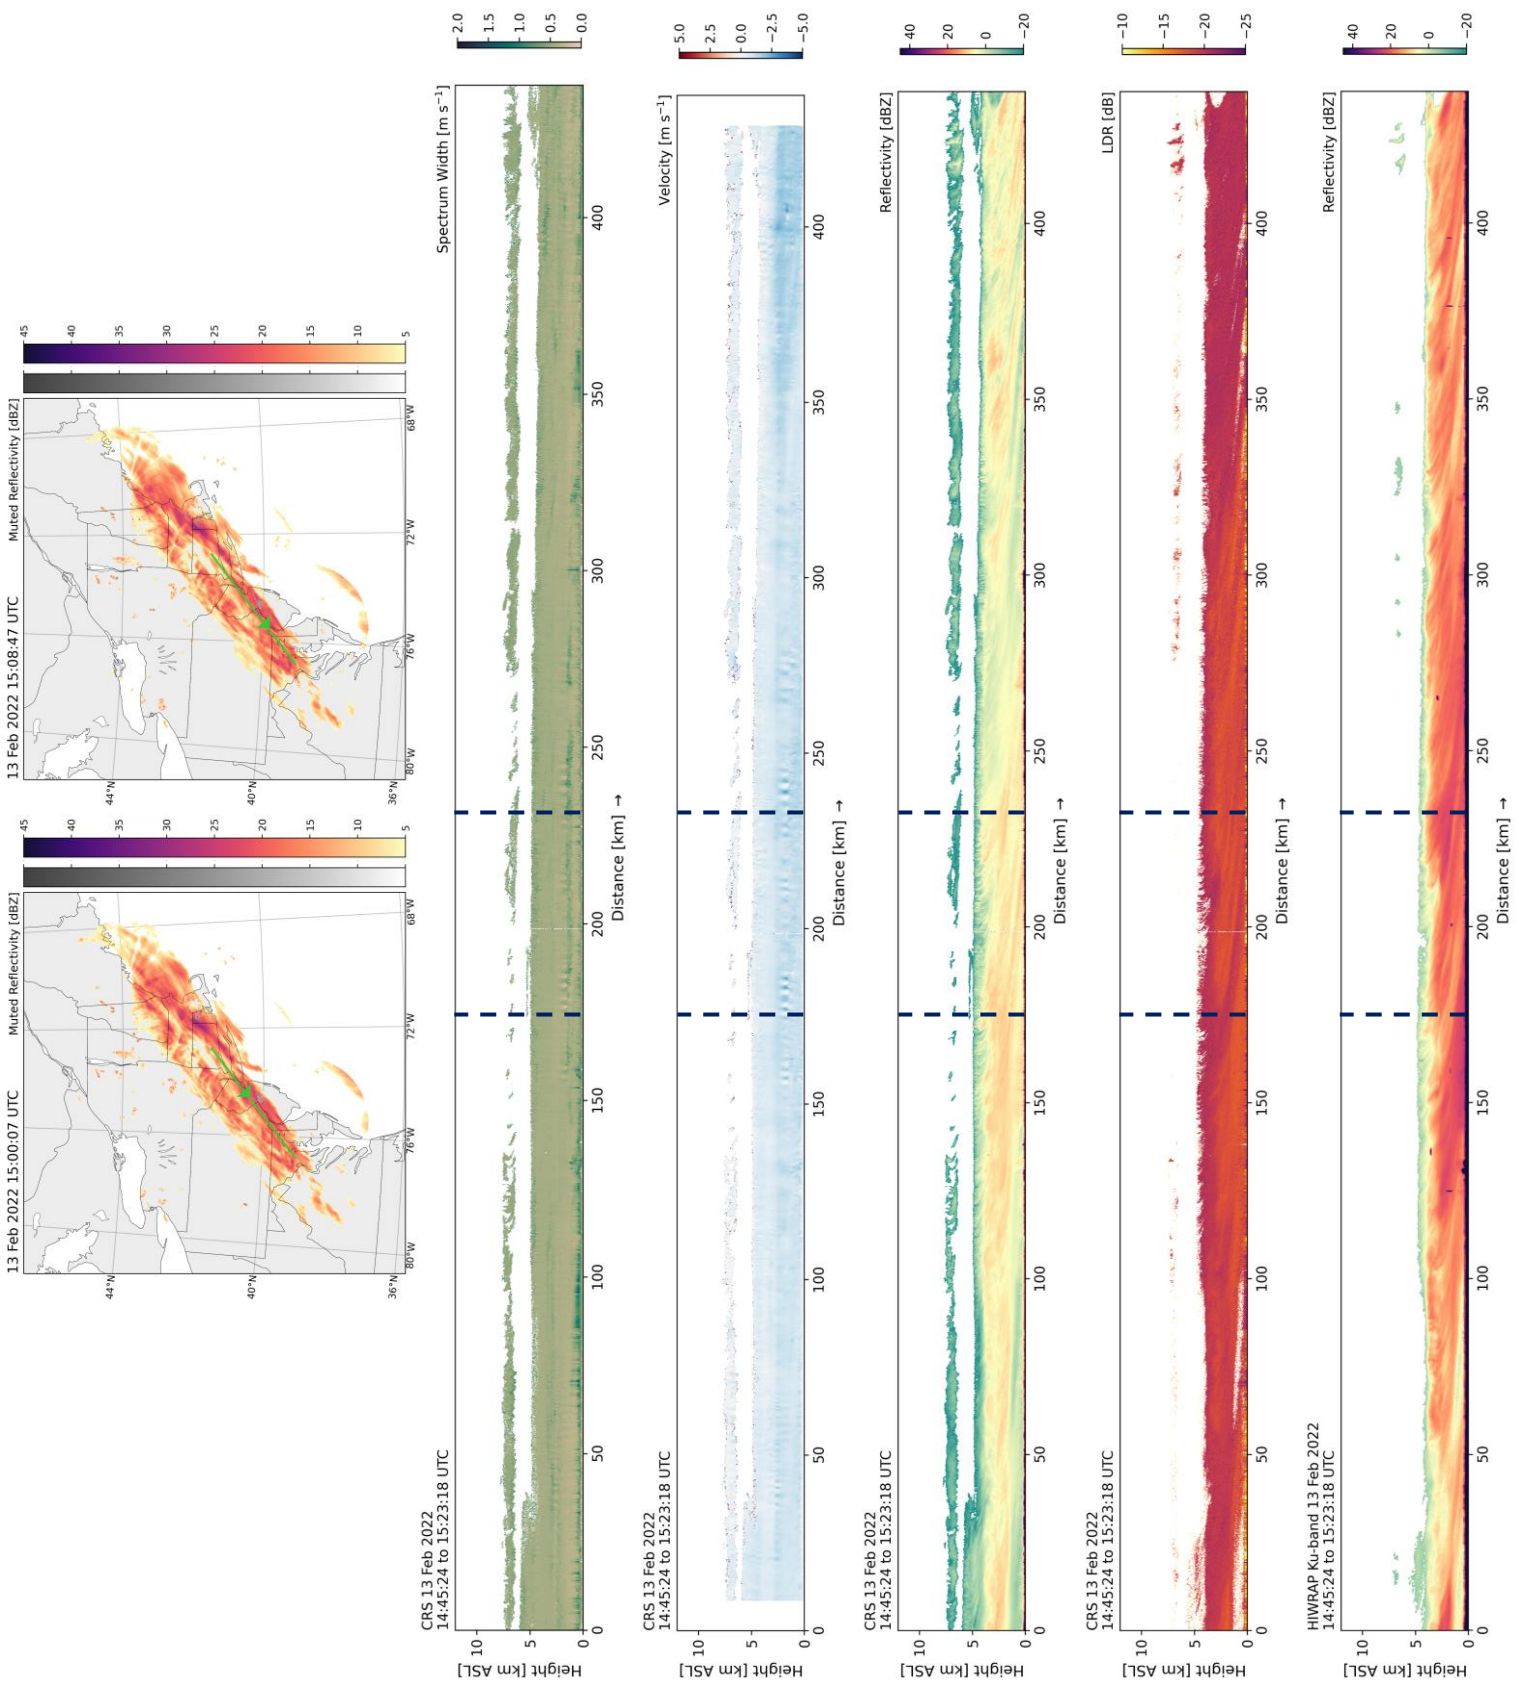



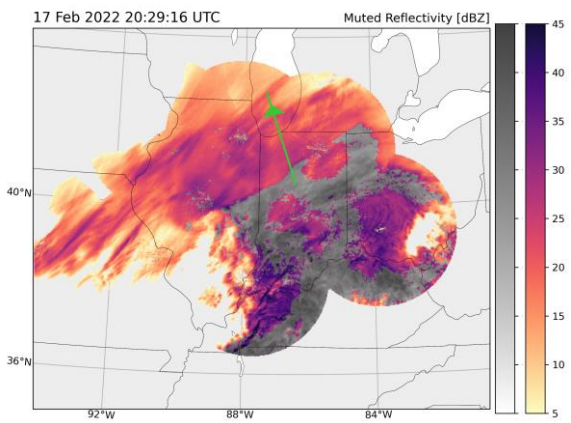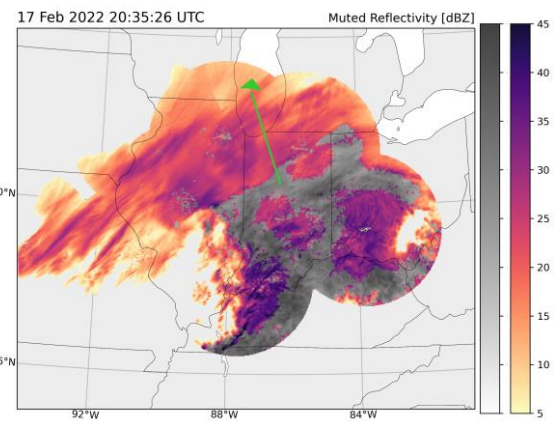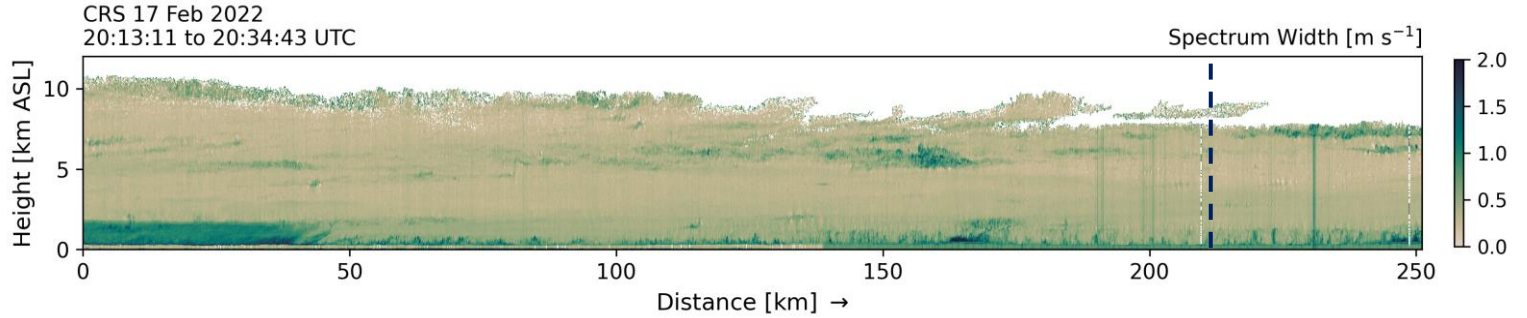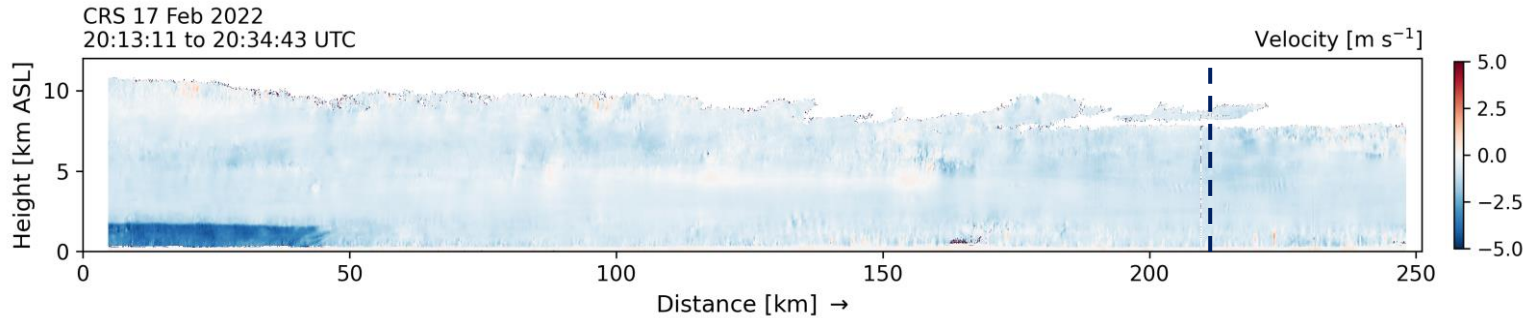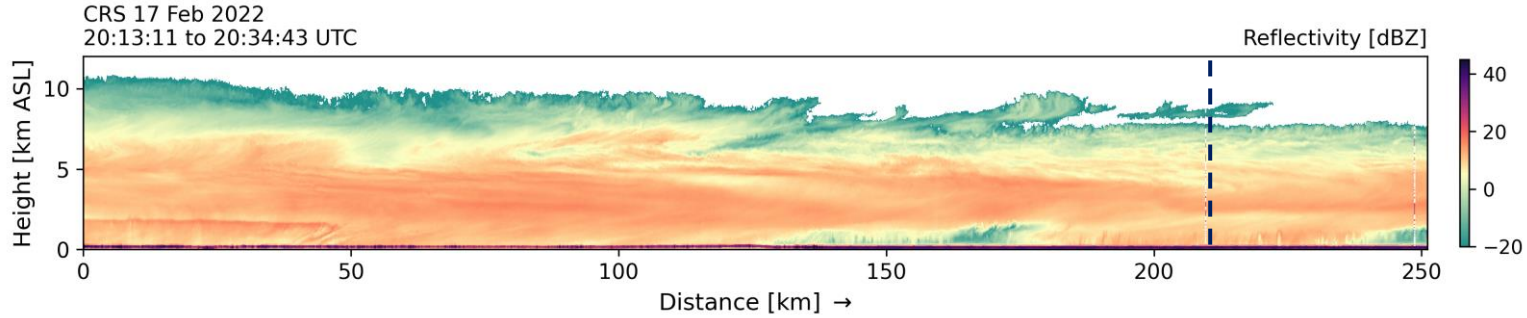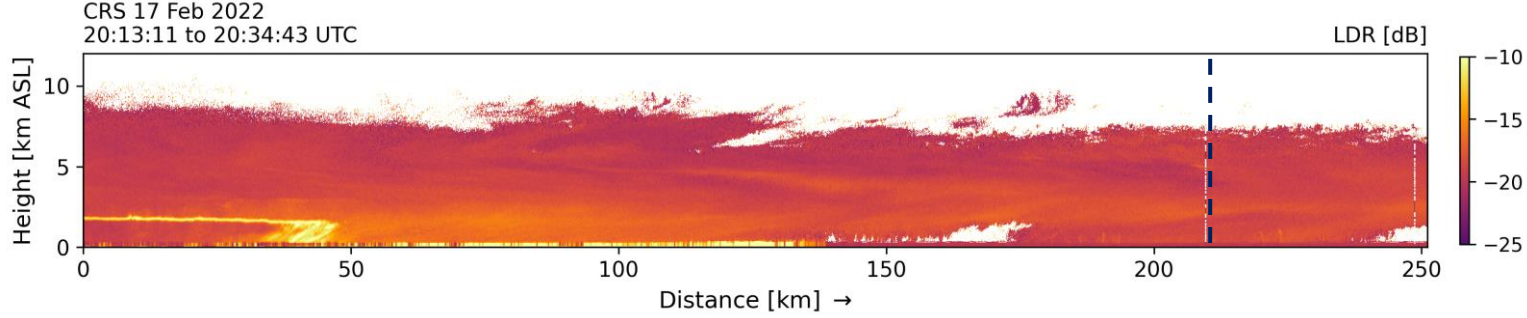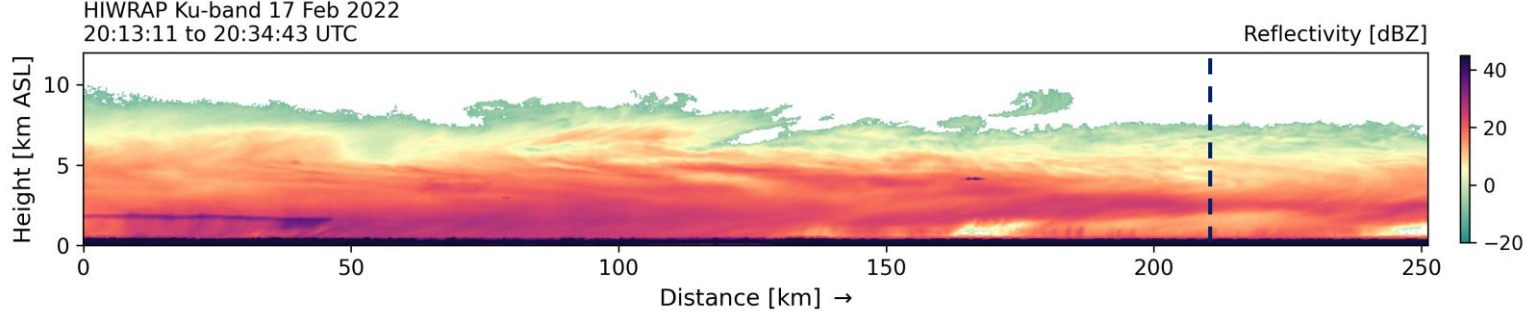

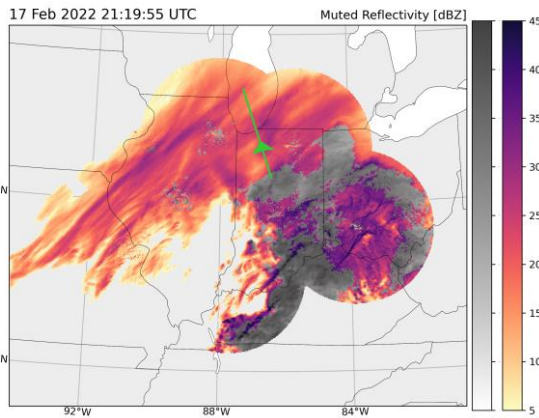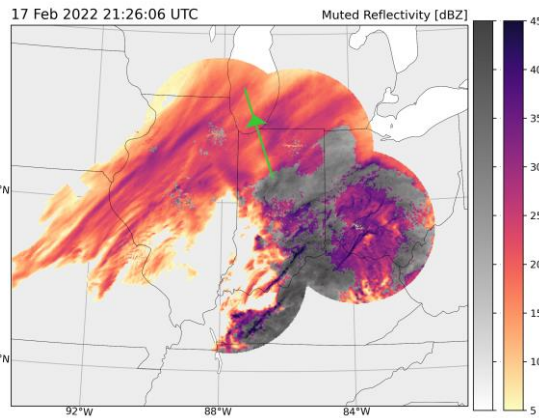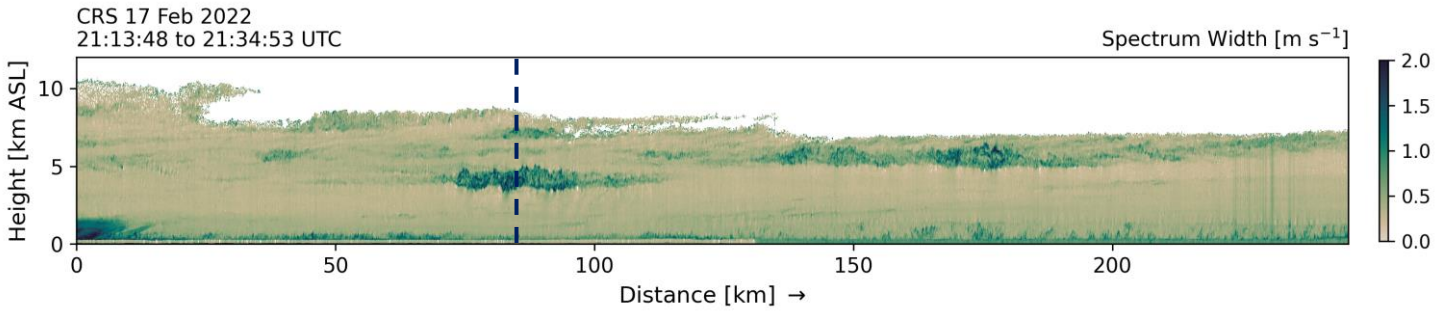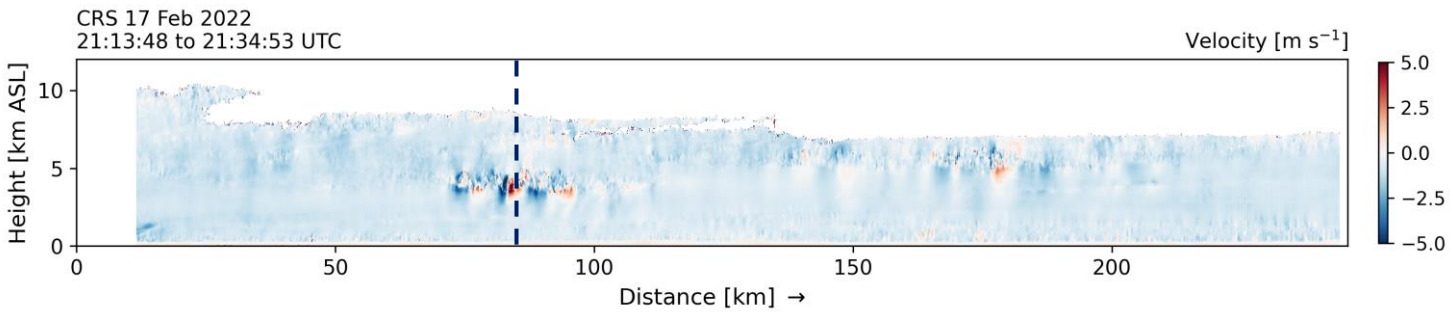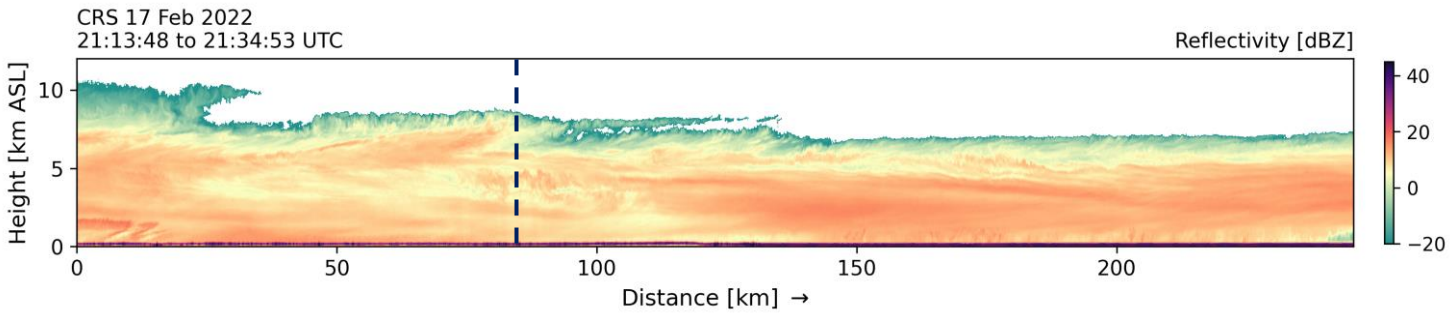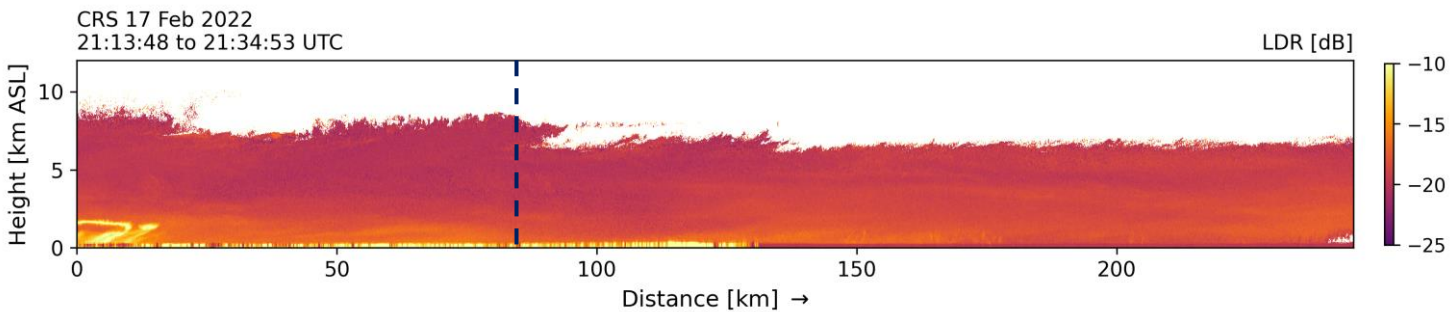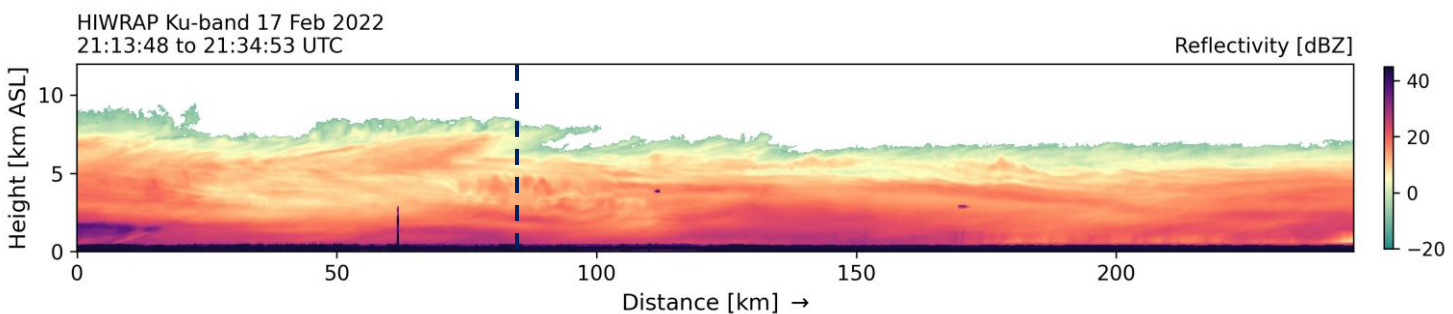



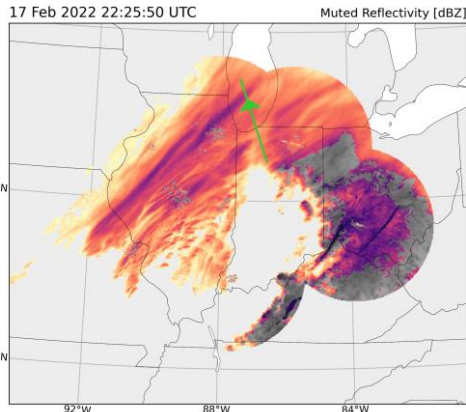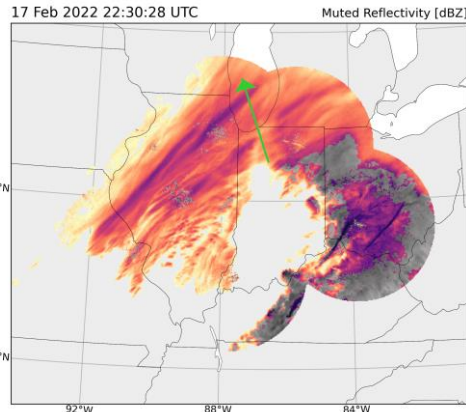

CRS 17 Feb 2022  
22:13:37 to 22:33:01 UTC

Spectrum Width [ $\text{m s}^{-1}$ ]

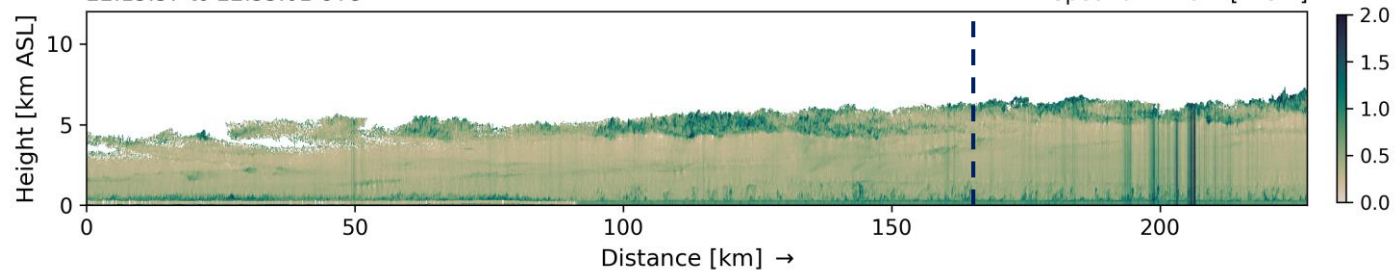

CRS 17 Feb 2022  
22:13:37 to 22:33:01 UTC

Velocity [ $\text{m s}^{-1}$ ]

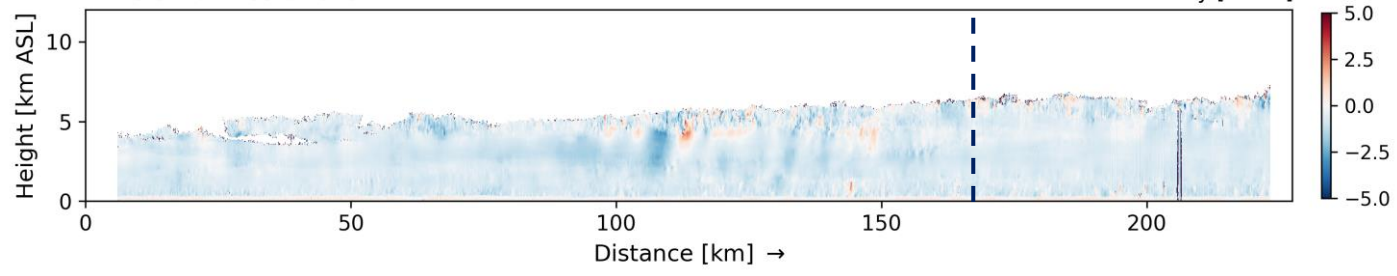

CRS 17 Feb 2022  
22:13:37 to 22:33:01 UTC

Reflectivity [dBZ]

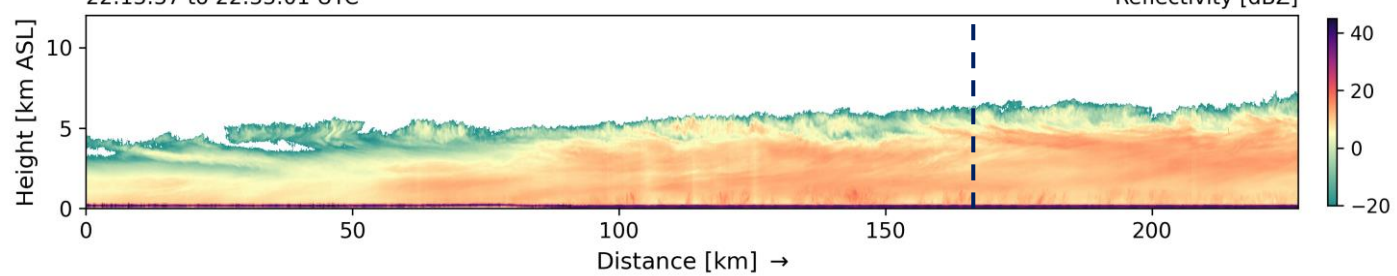

CRS 17 Feb 2022  
22:13:37 to 22:33:01 UTC

LDR [dB]

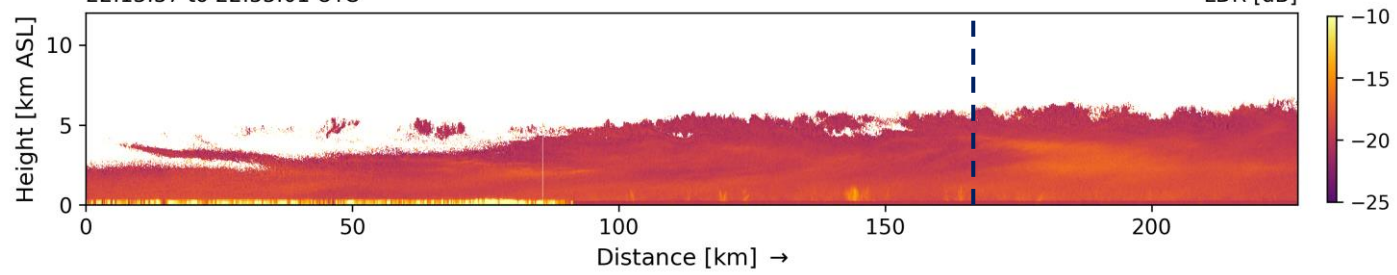

HIWRAP Ku-band 17 Feb 2022  
22:13:37 to 22:33:01 UTC

Reflectivity [dBZ]

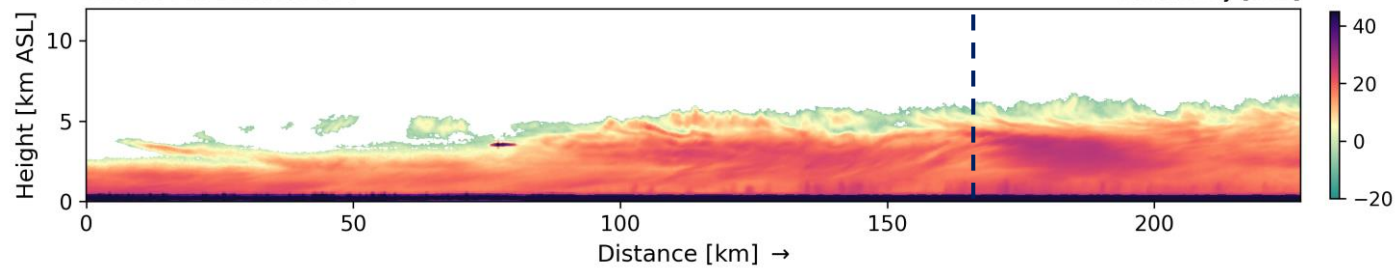



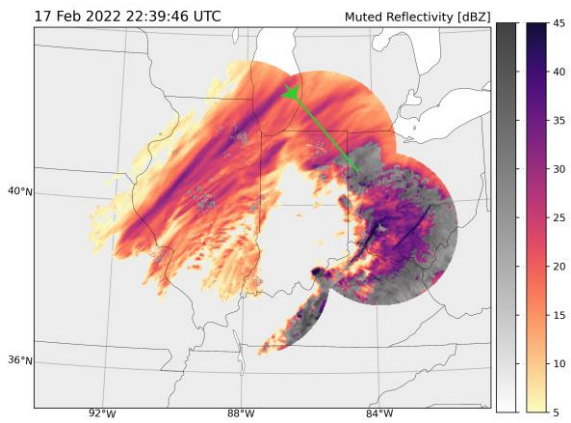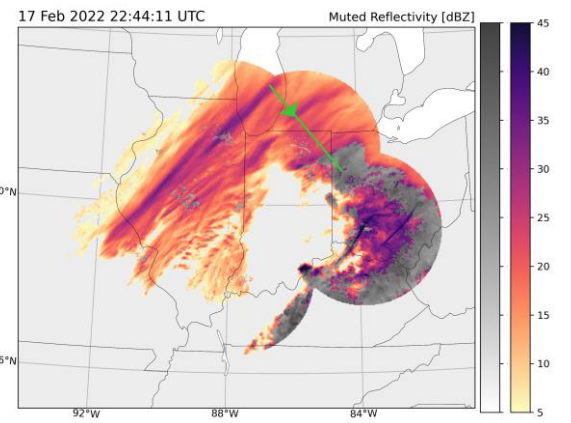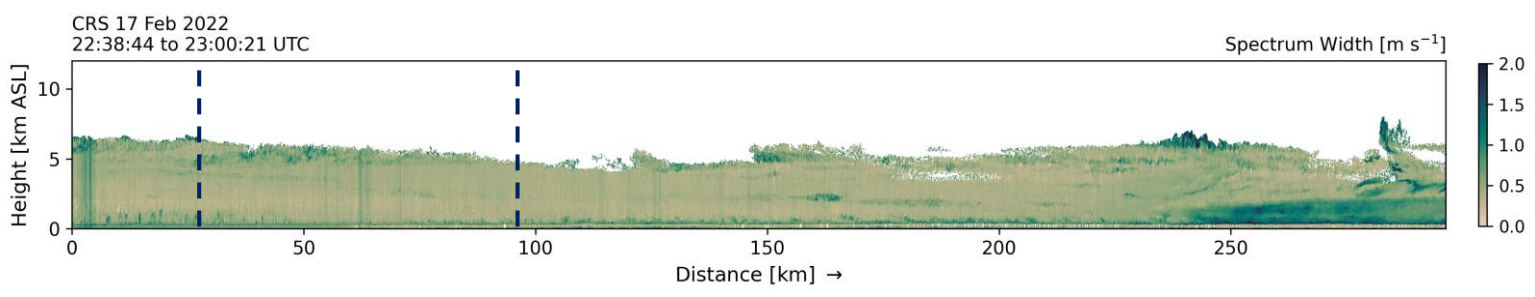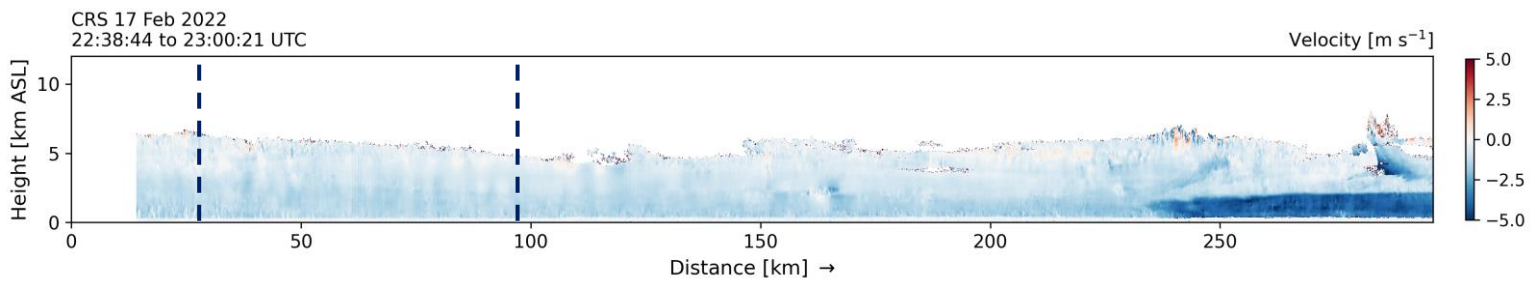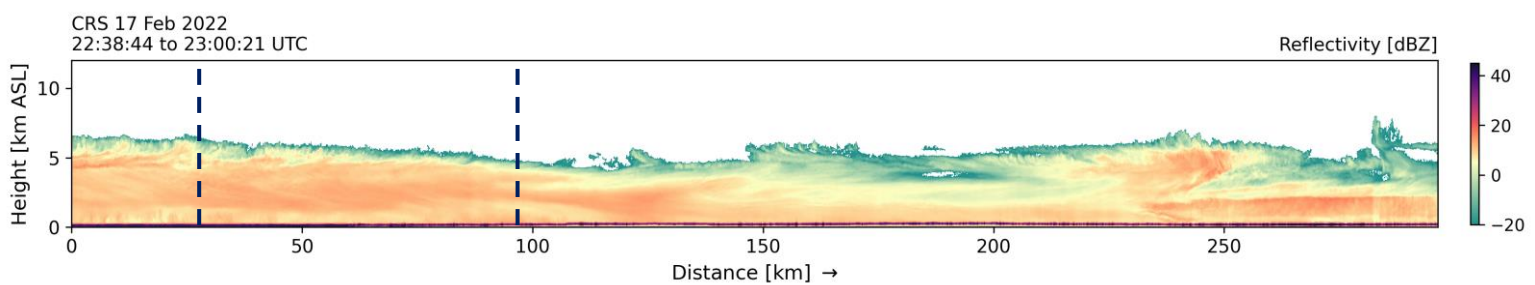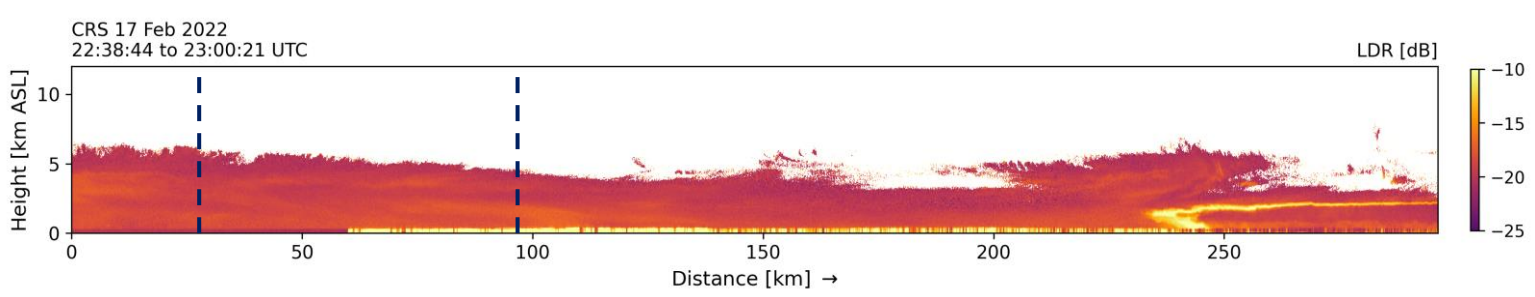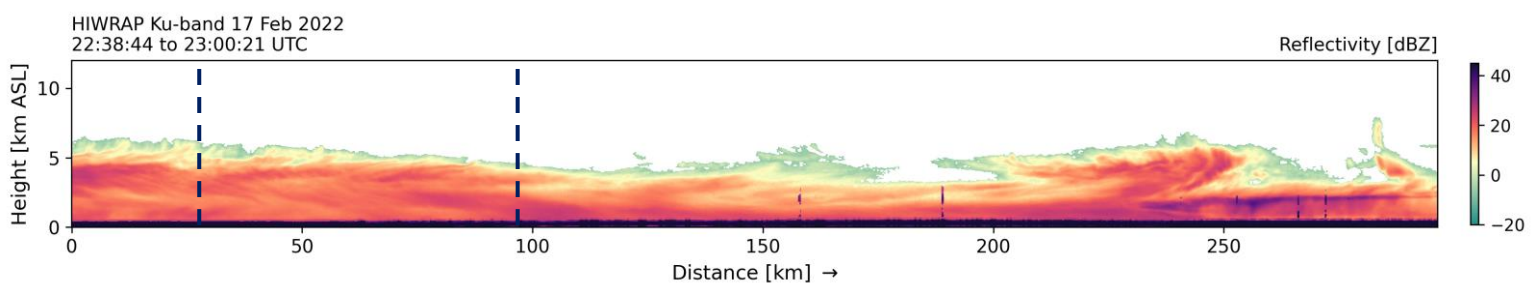

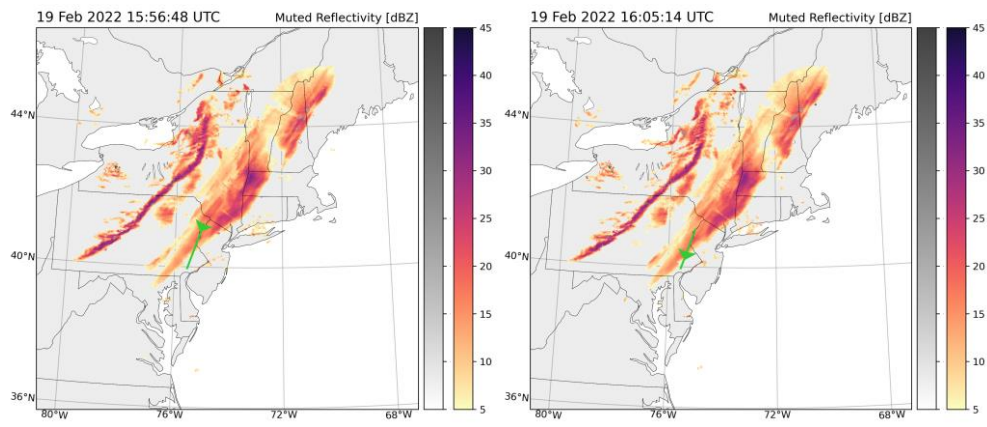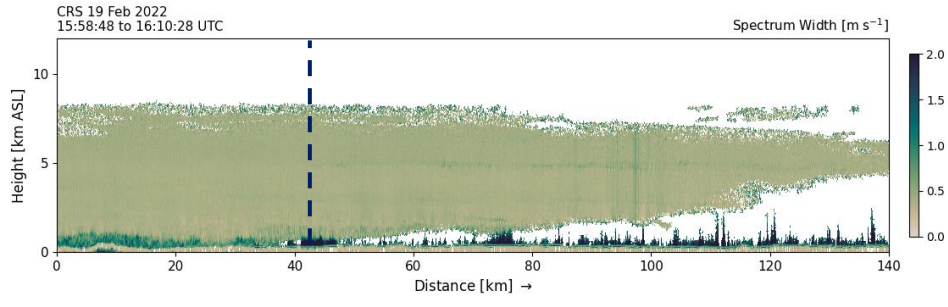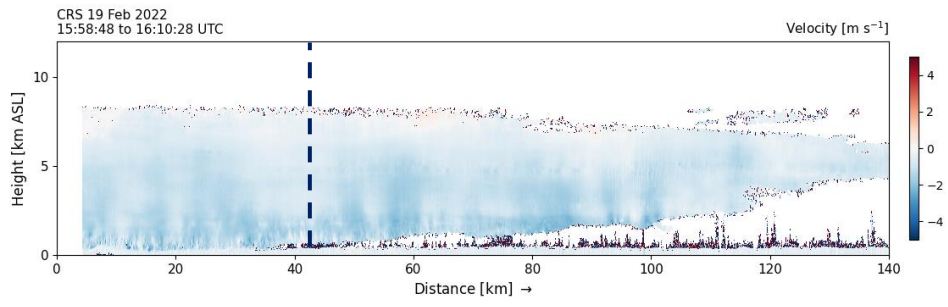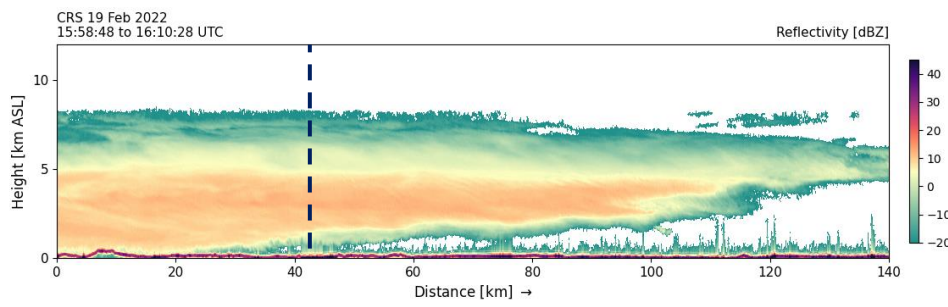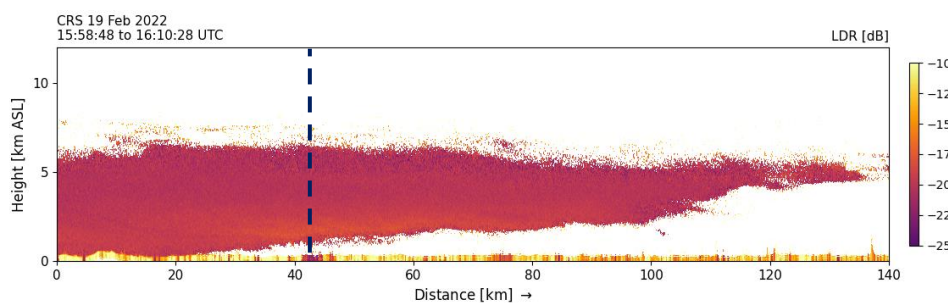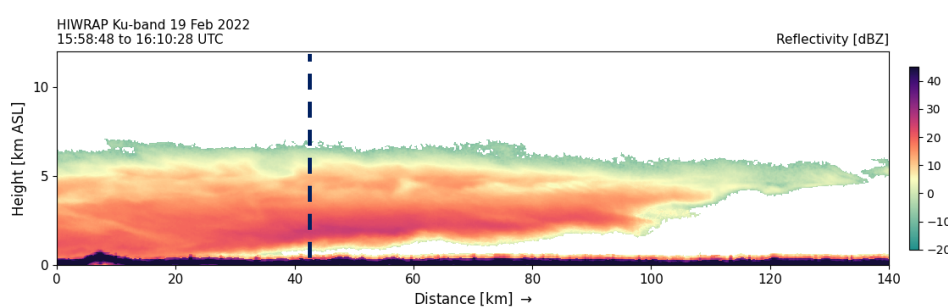



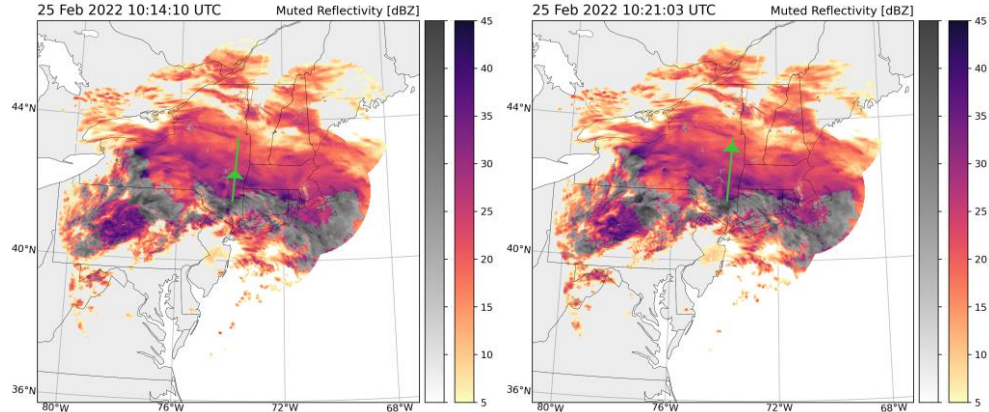

CRS 25 Feb 2022  
10:08:42 to 10:24:45 UTC

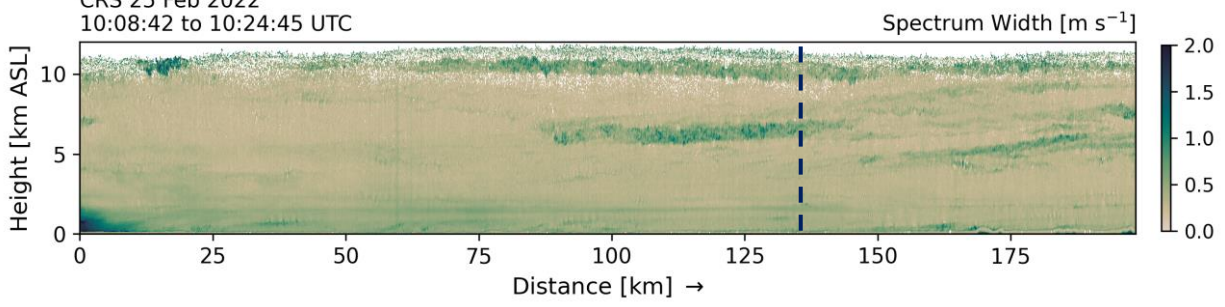

CRS 25 Feb 2022  
10:08:42 to 10:24:45 UTC

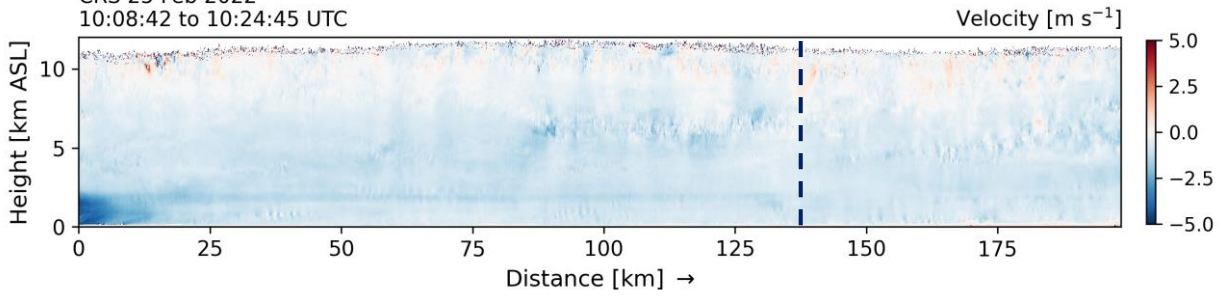

CRS 25 Feb 2022  
10:08:42 to 10:24:45 UTC

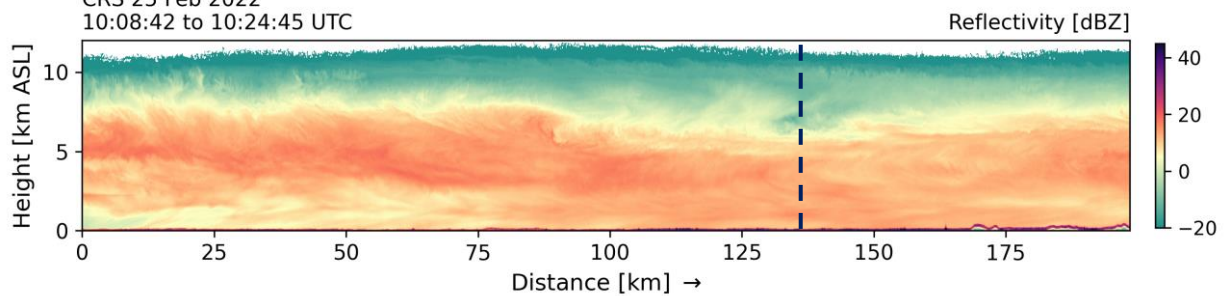

CRS 25 Feb 2022  
10:08:42 to 10:24:45 UTC

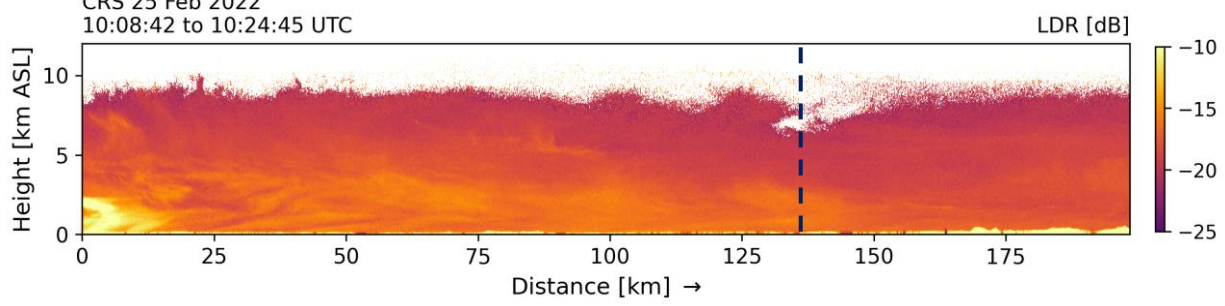

HIWRAP Ku-band 25 Feb 2022  
10:08:42 to 10:24:45 UTC

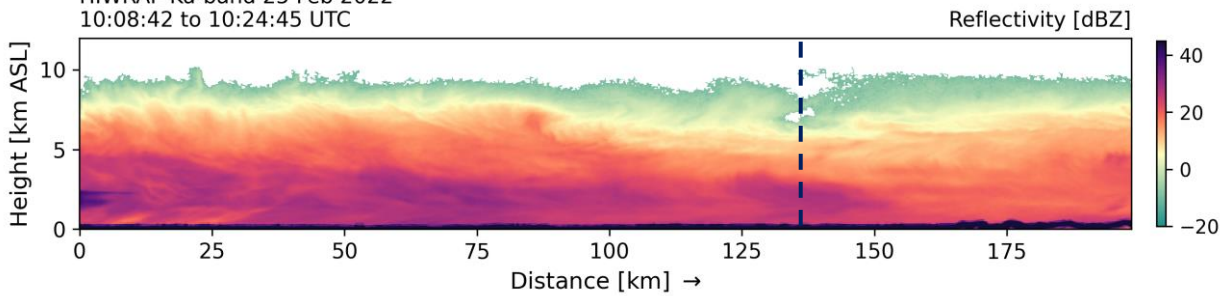



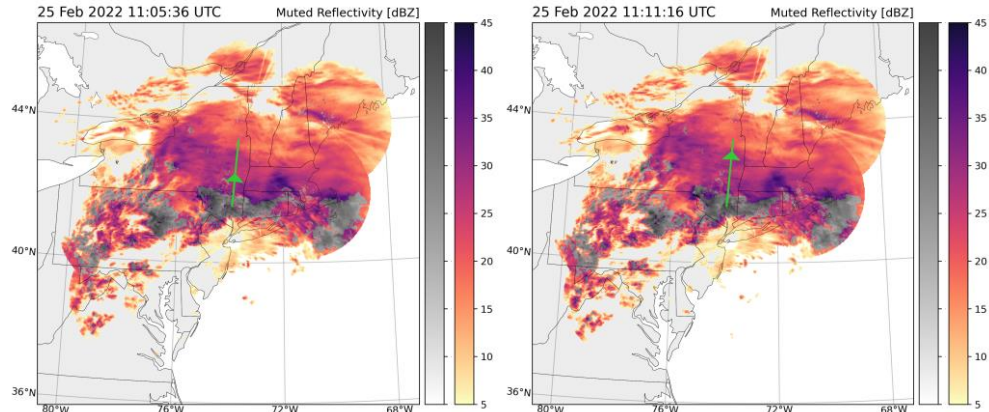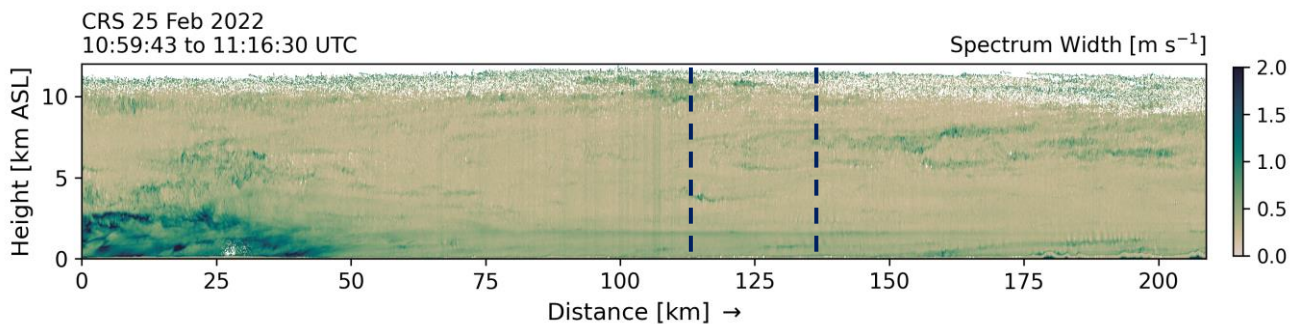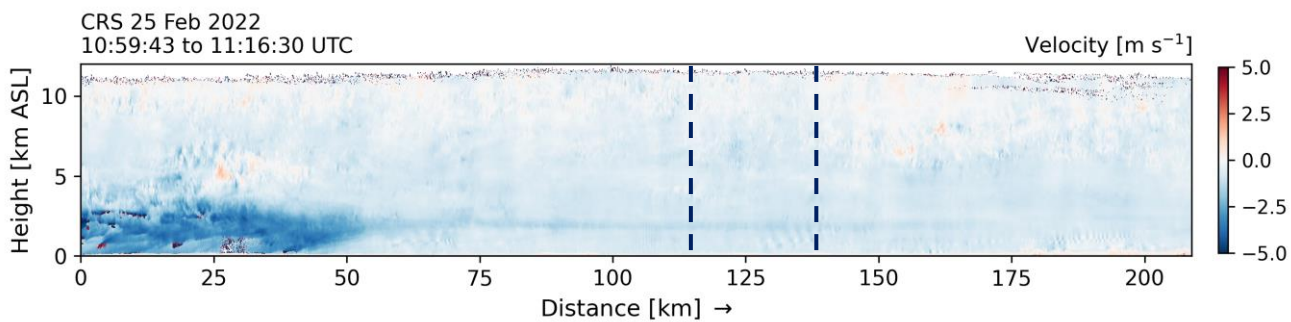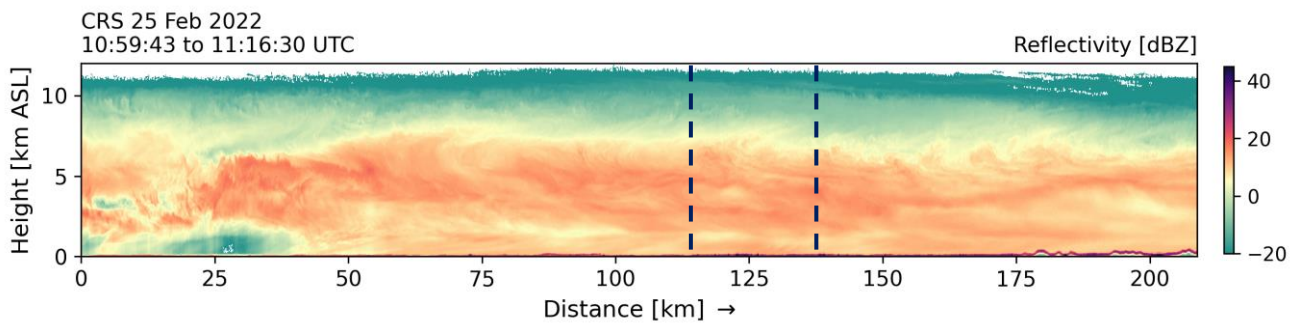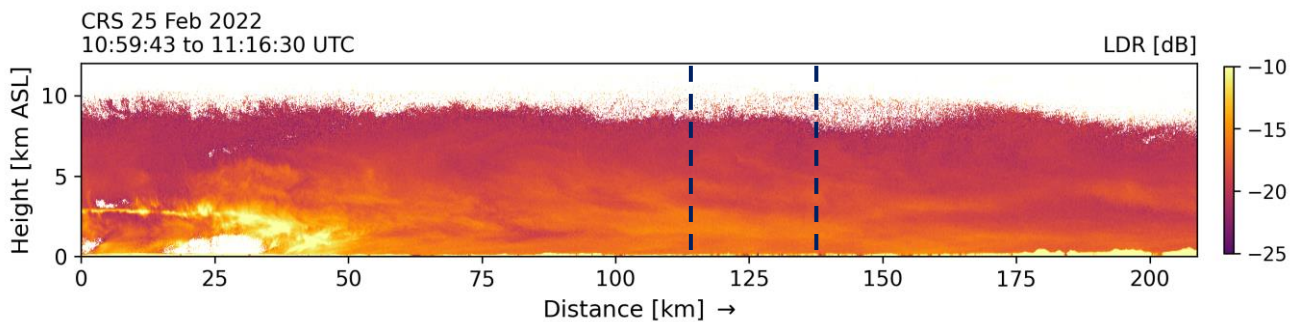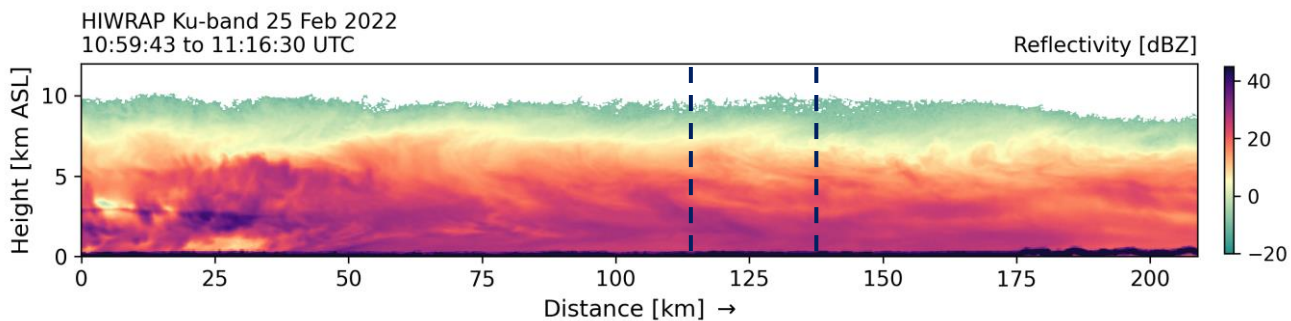

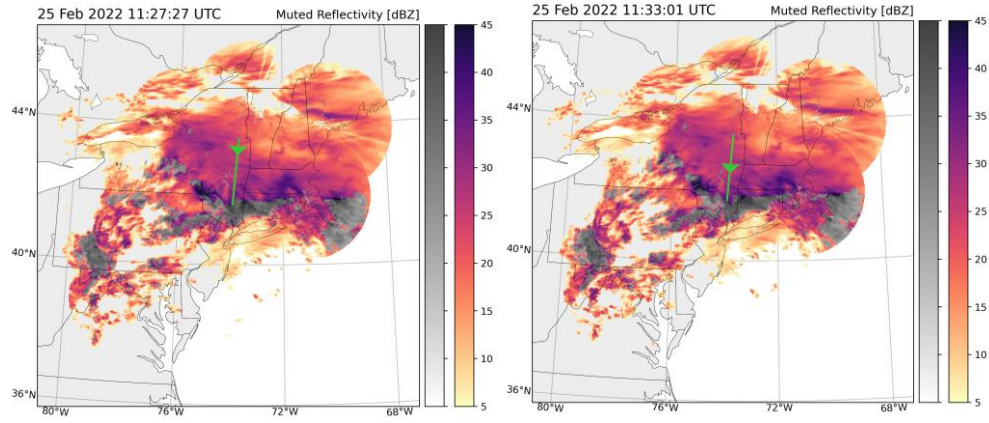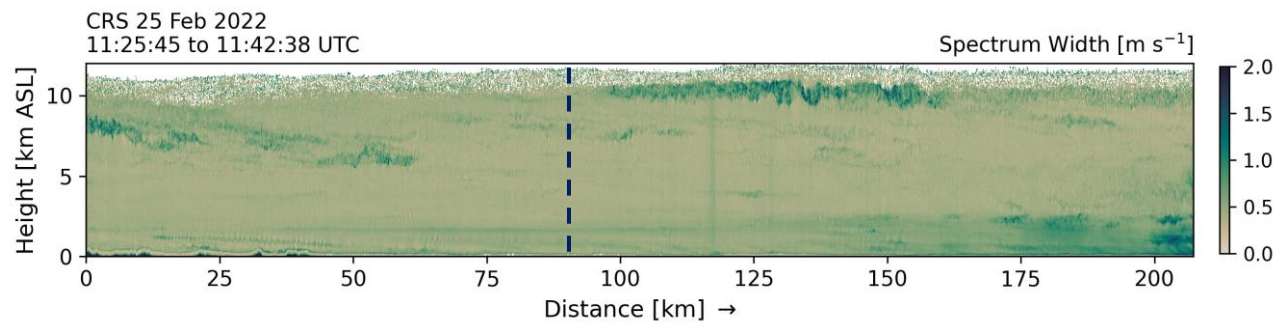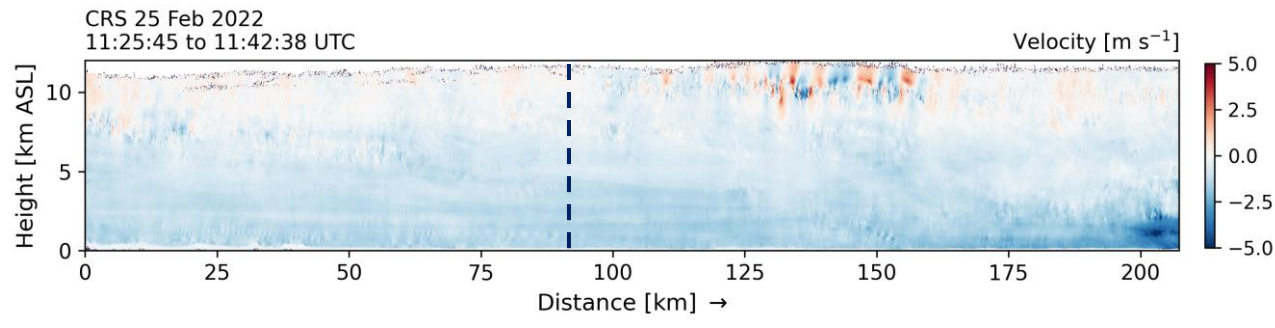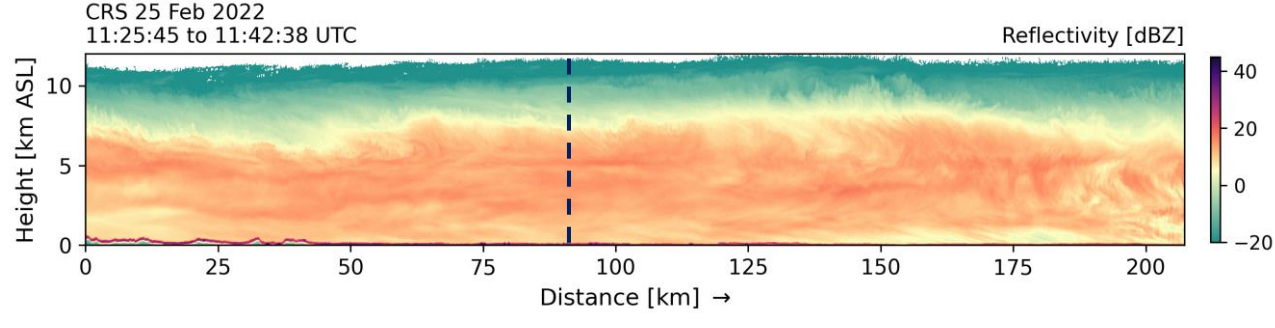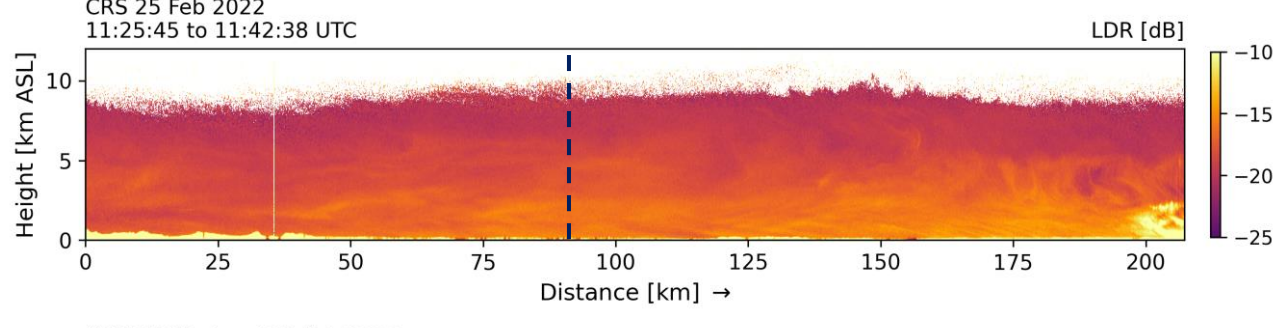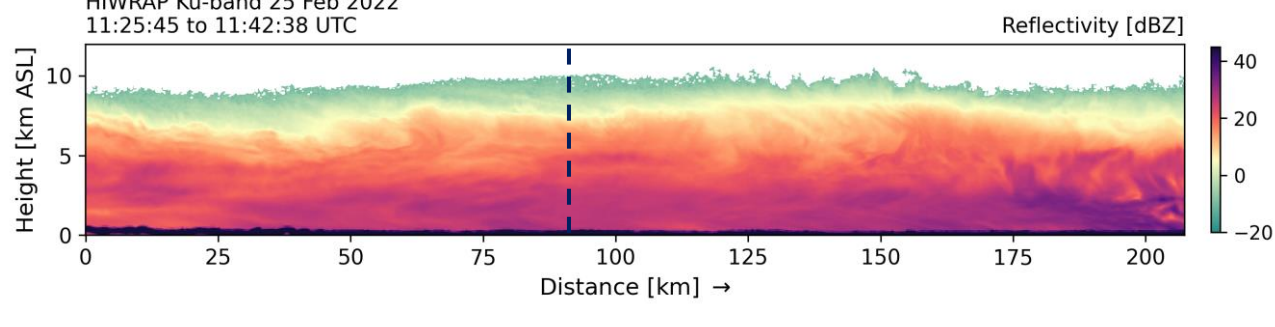



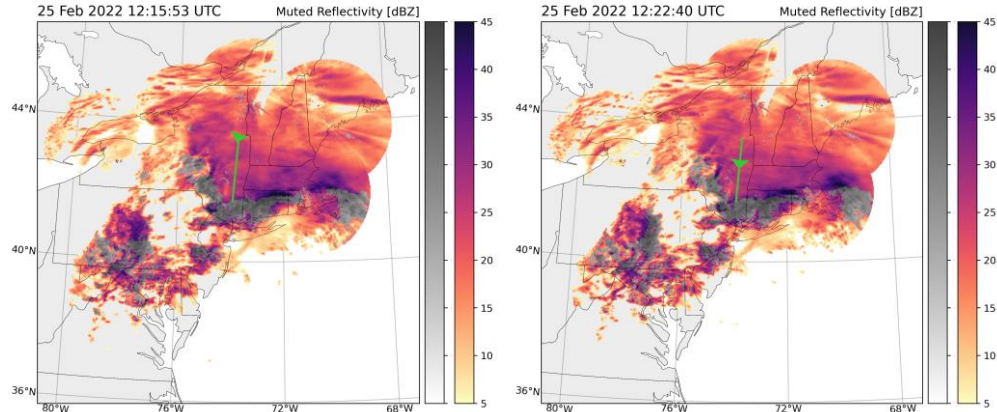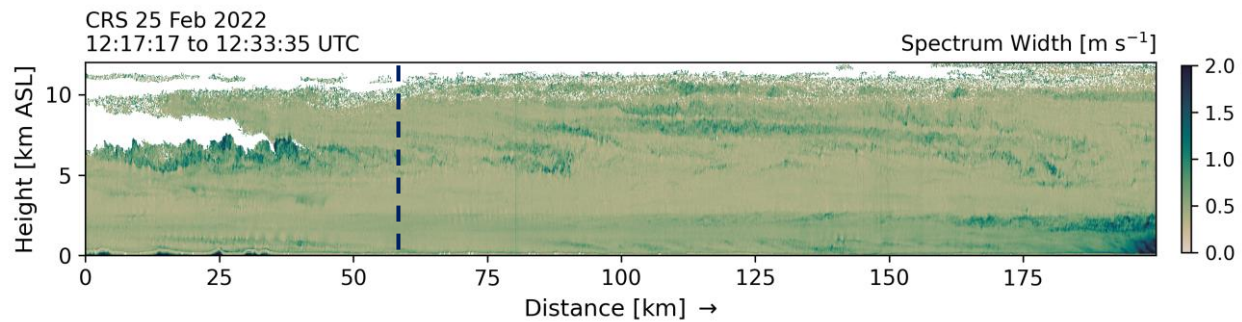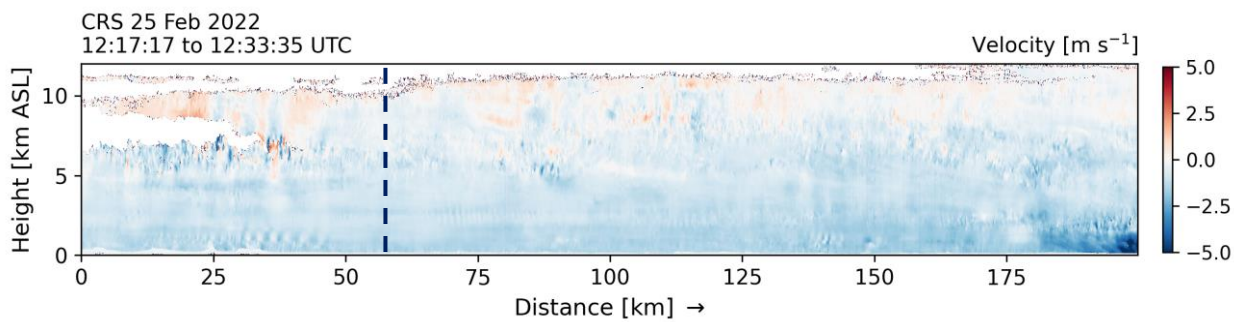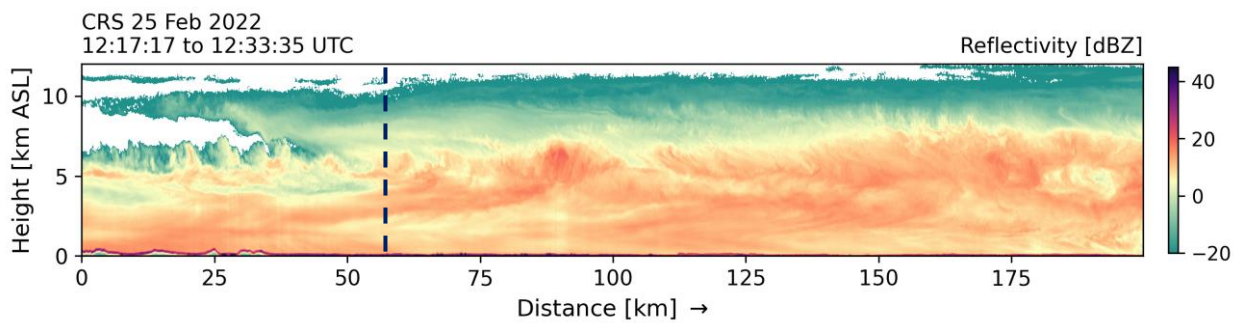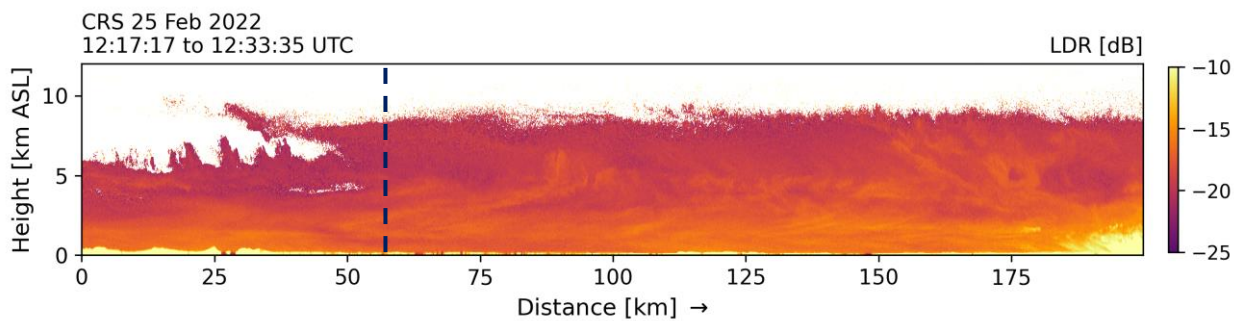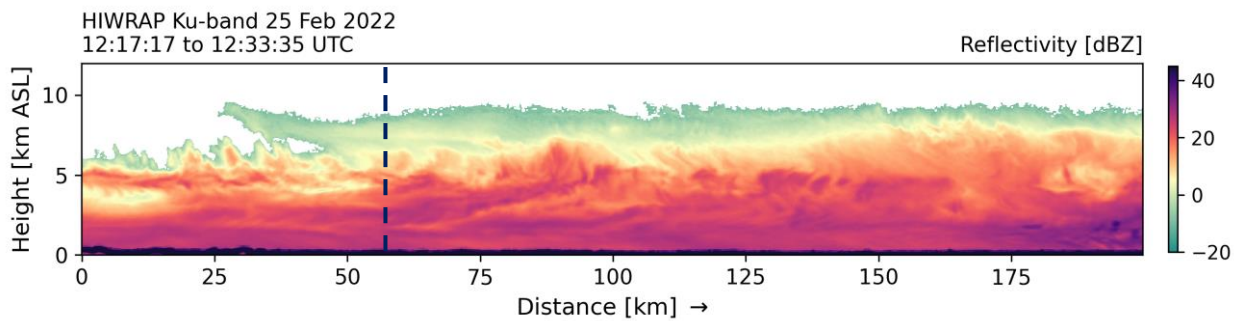



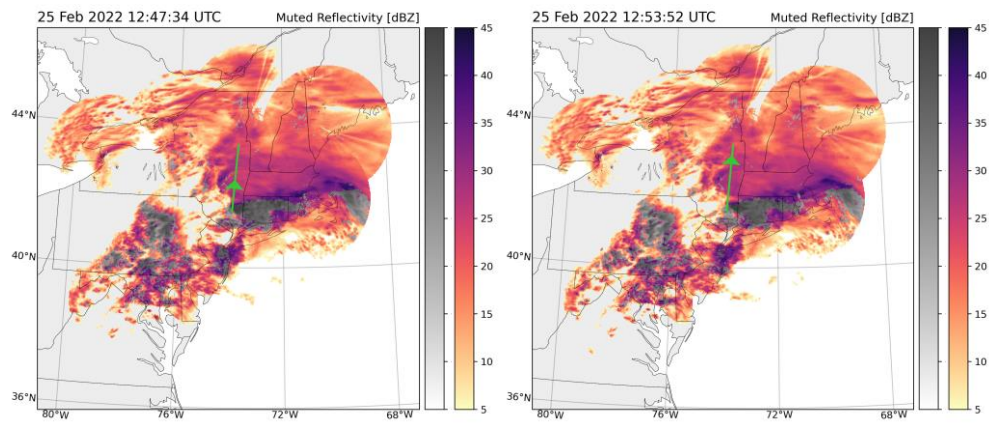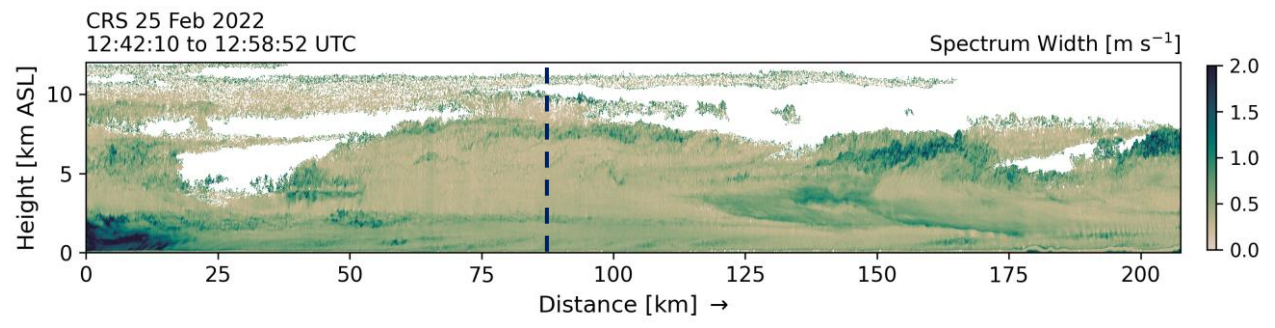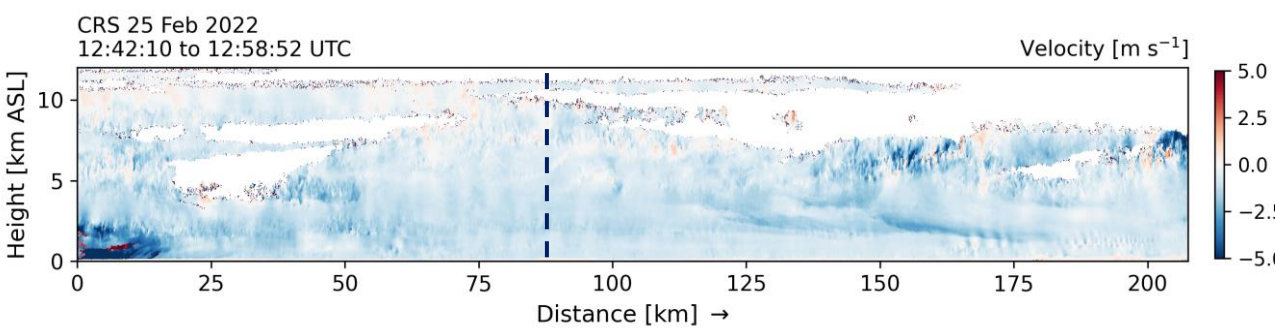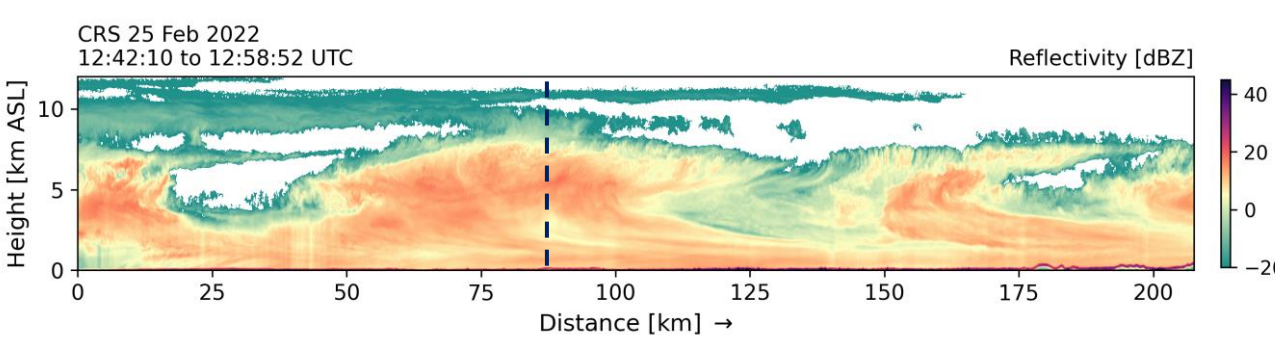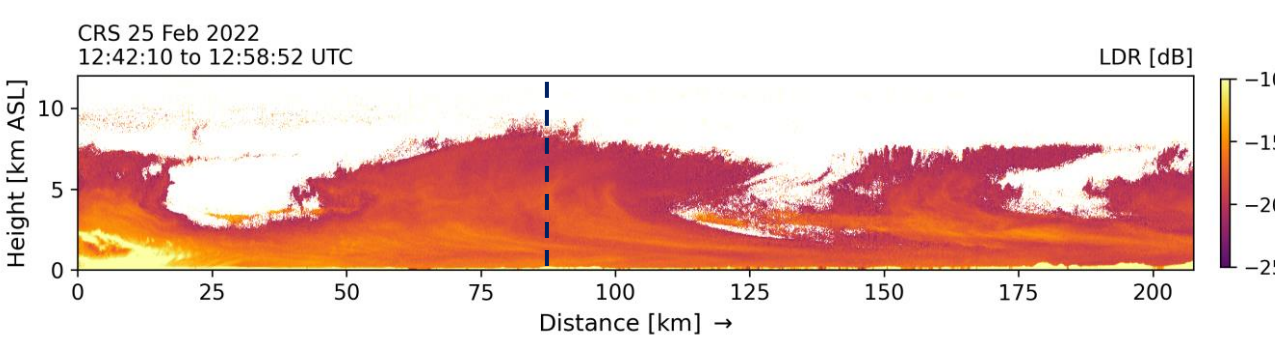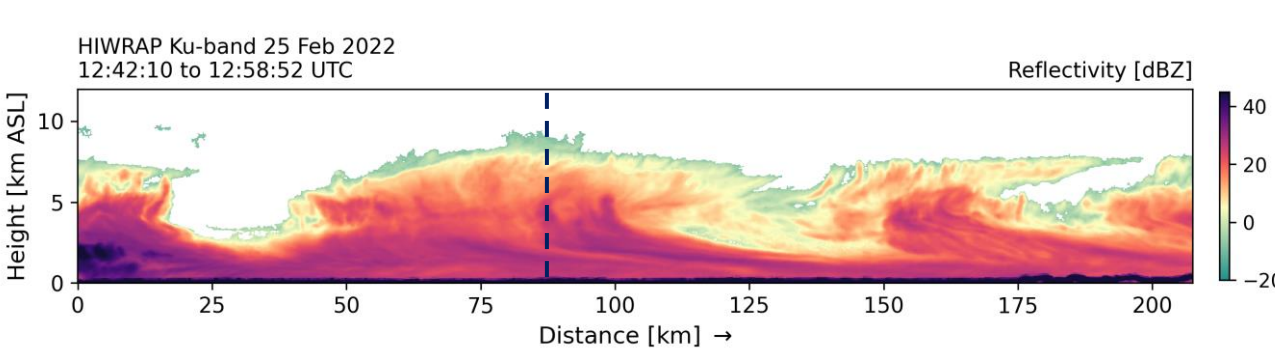



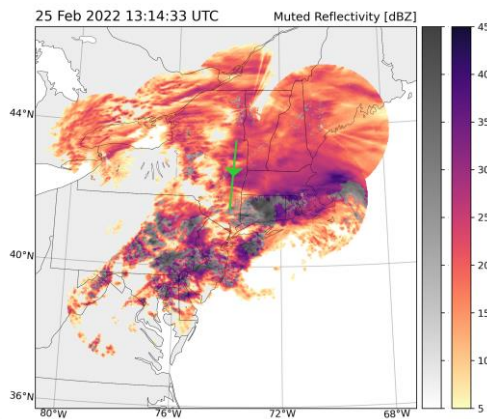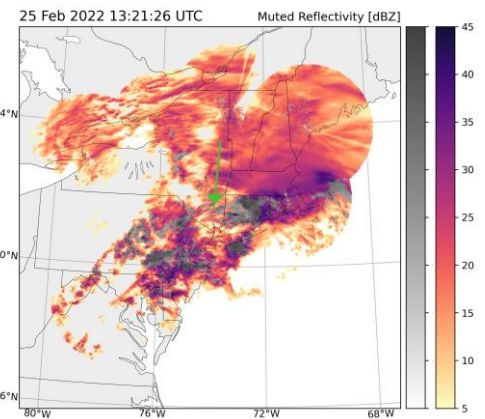

CRS 25 Feb 2022  
13:07:47 to 13:25:18 UTC

Spectrum Width [ $\text{m s}^{-1}$ ]

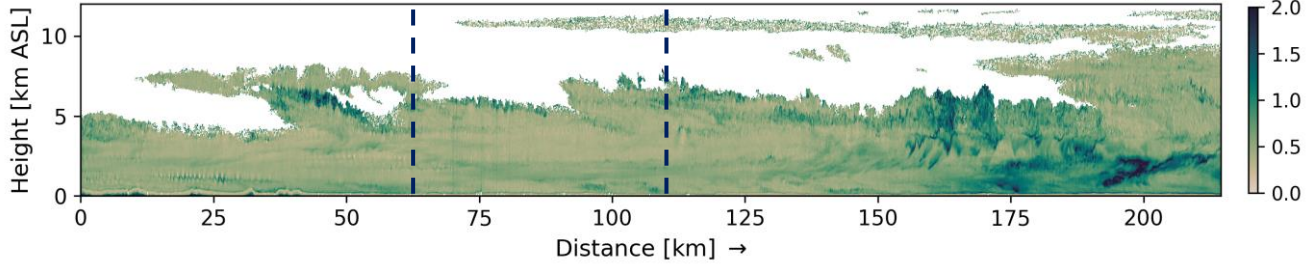

CRS 25 Feb 2022  
13:07:47 to 13:25:18 UTC

Velocity [ $\text{m s}^{-1}$ ]

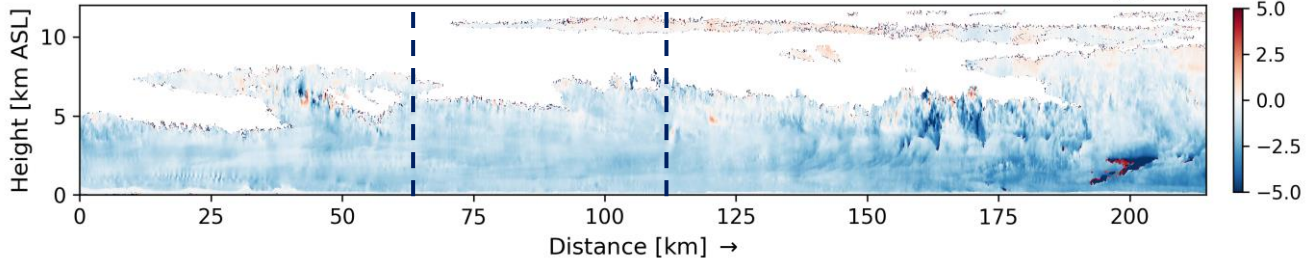

CRS 25 Feb 2022  
13:07:47 to 13:25:18 UTC

Reflectivity [dBZ]

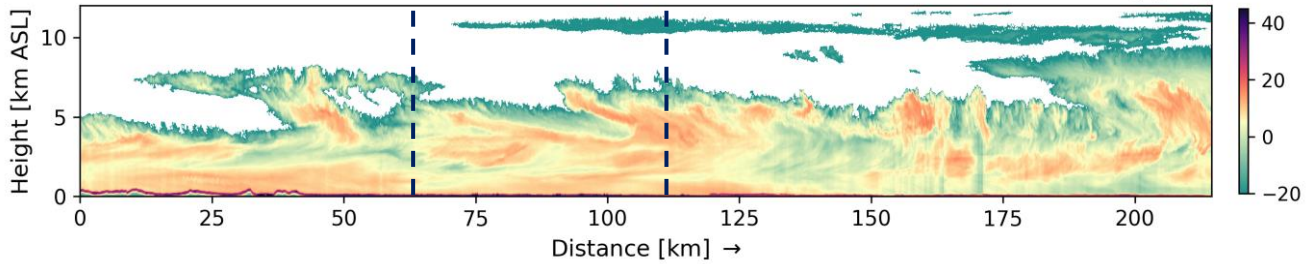

CRS 25 Feb 2022  
13:07:47 to 13:25:18 UTC

LDR [dB]

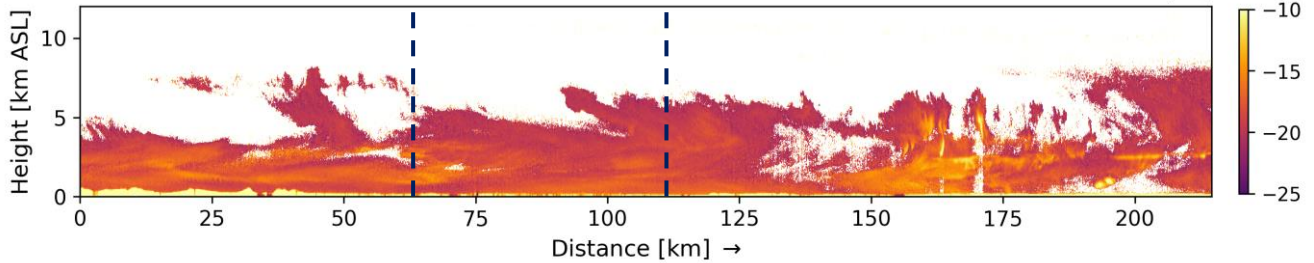

HIWRAP Ku-band 25 Feb 2022  
13:07:47 to 13:25:18 UTC

Reflectivity [dBZ]

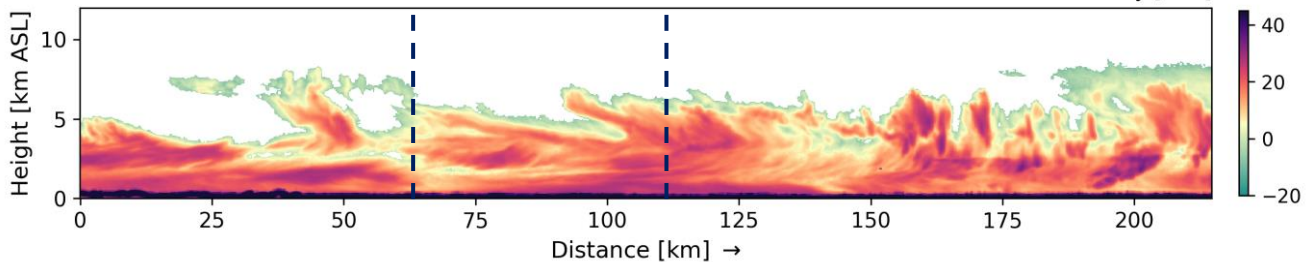

2023



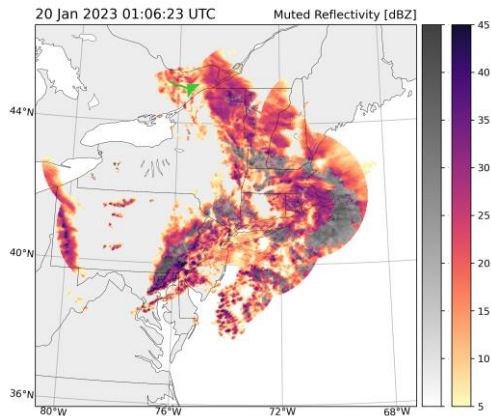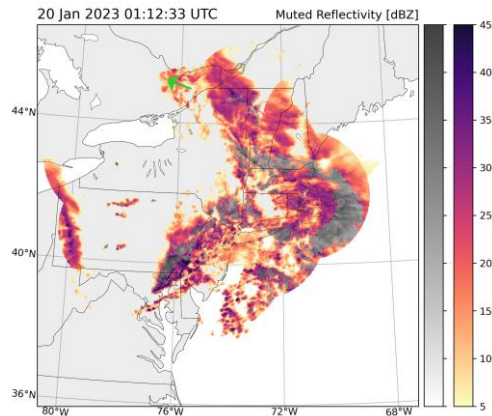

CRS 20 Jan 2023 01:08:07 to 01:13:36 UTC  
Velocity [ $\text{m s}^{-1}$ ]

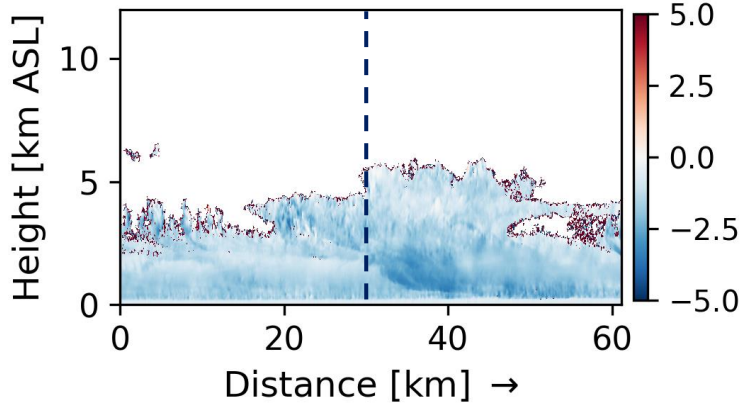

CRS 20 Jan 2023 01:08:07 to 01:13:36 UTC  
Reflectivity [dBZ]

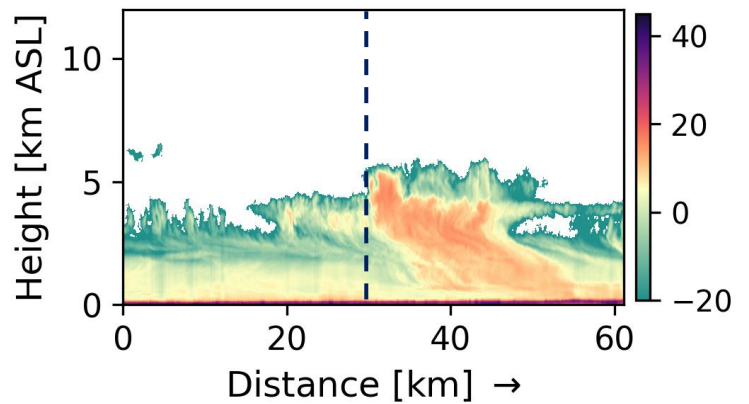

CRS 20 Jan 2023 01:08:07 to 01:13:36 UTC  
LDR [dB]

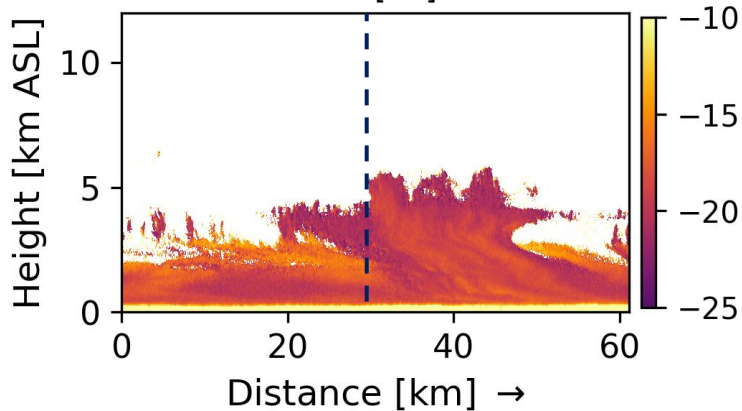

EXRAD 20 Jan 2023 01:08:07 to 01:13:36 UTC  
Reflectivity [dBZ]

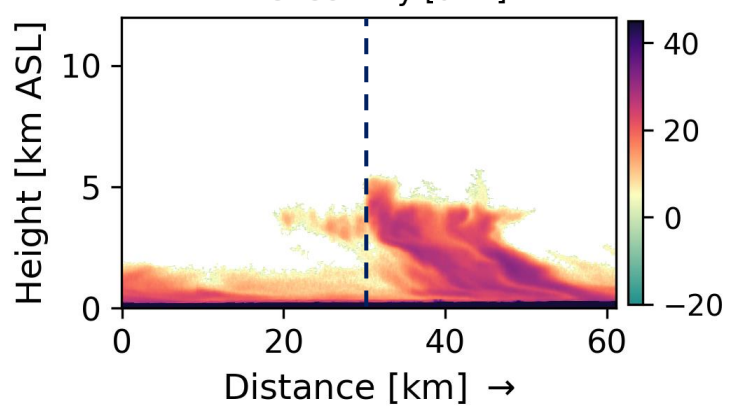

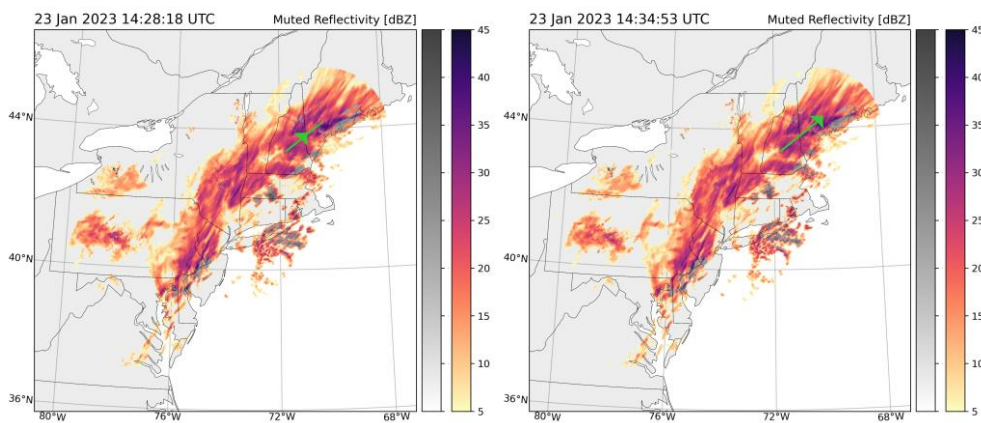

CRS 23 Jan 2023  
14:23:51 to 14:34:35 UTC

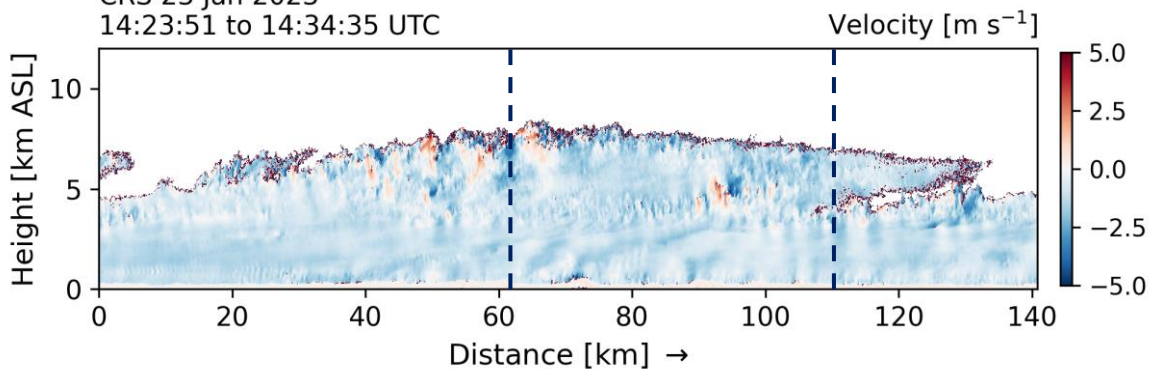

CRS 23 Jan 2023  
14:23:51 to 14:34:35 UTC

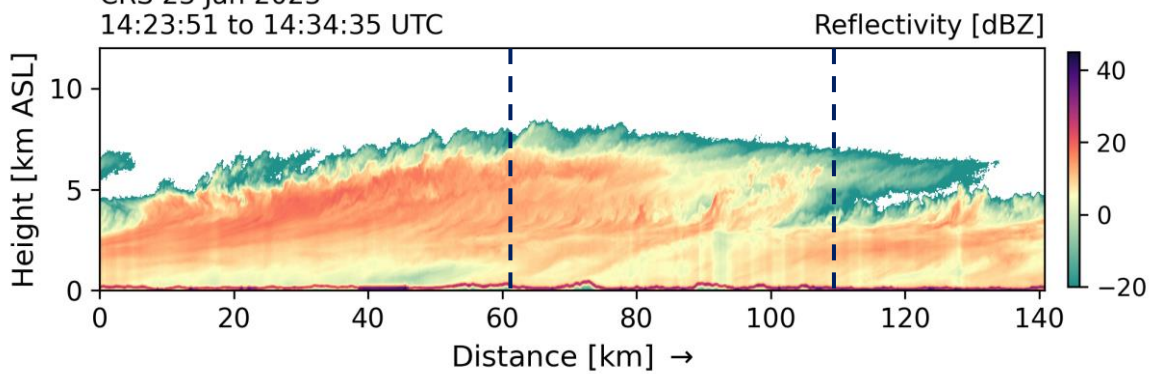

CRS 23 Jan 2023  
14:23:51 to 14:34:35 UTC

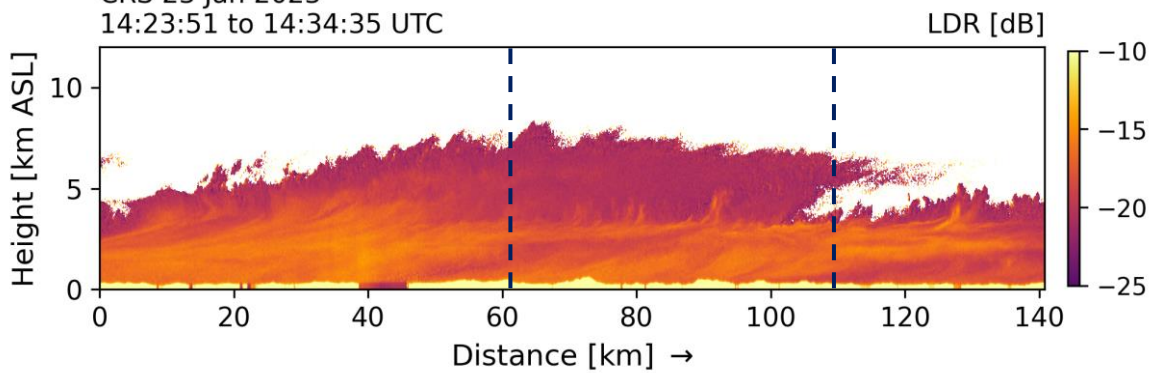

HIWRAP Ku-band 23 Jan 2023  
14:23:51 to 14:34:35 UTC

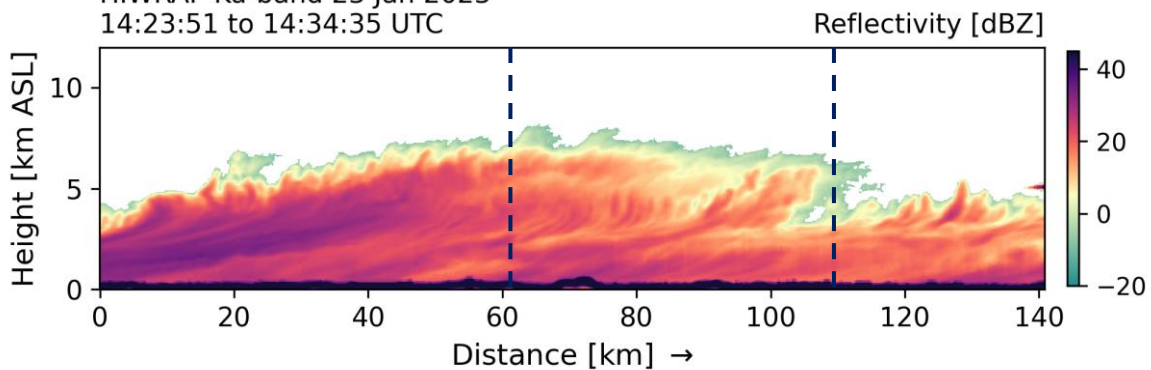

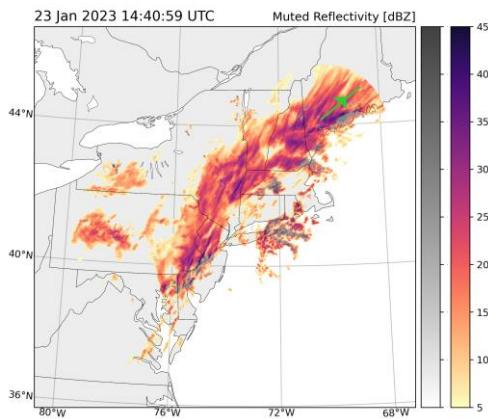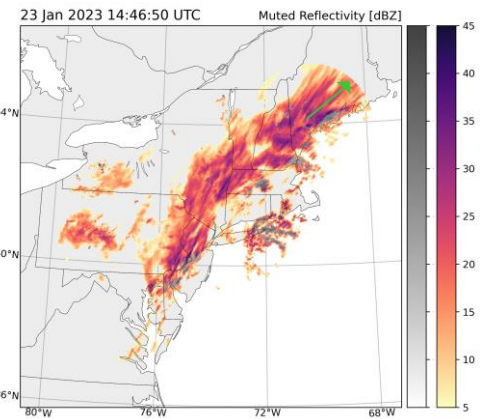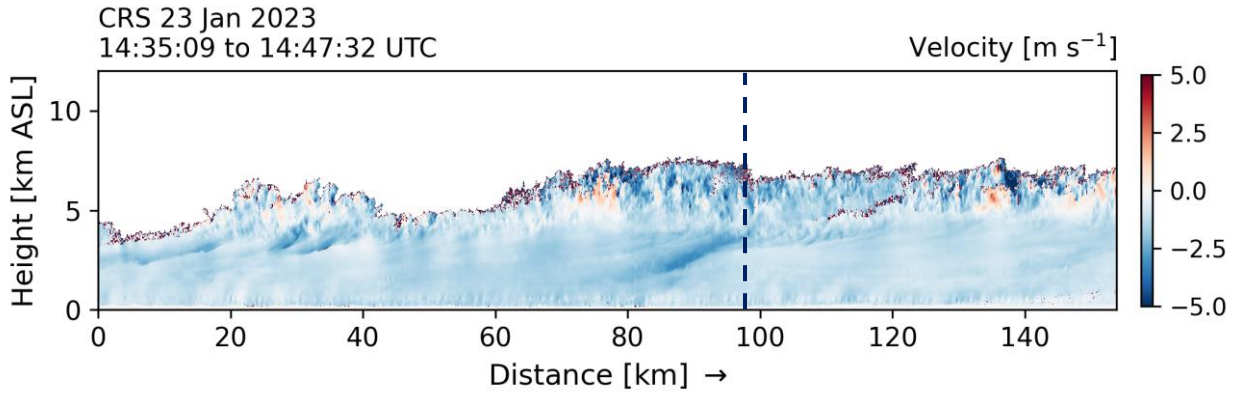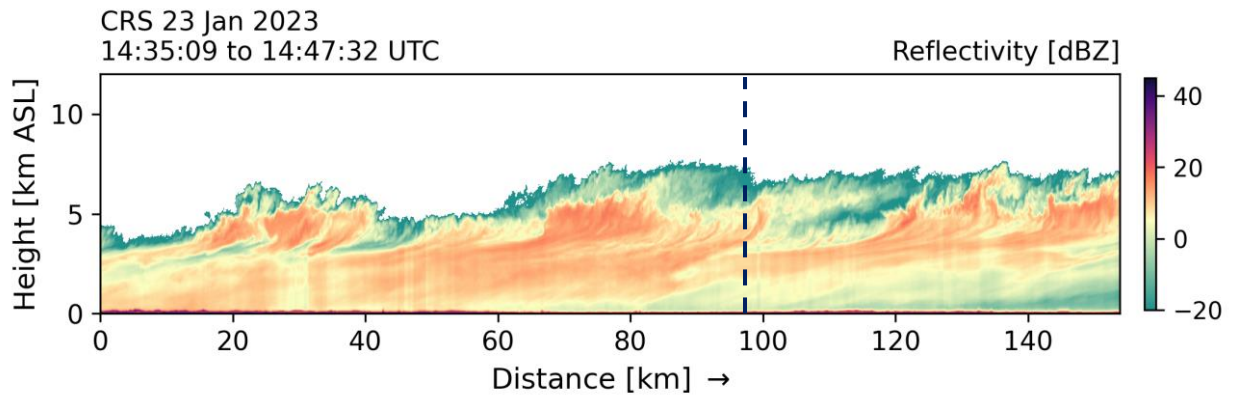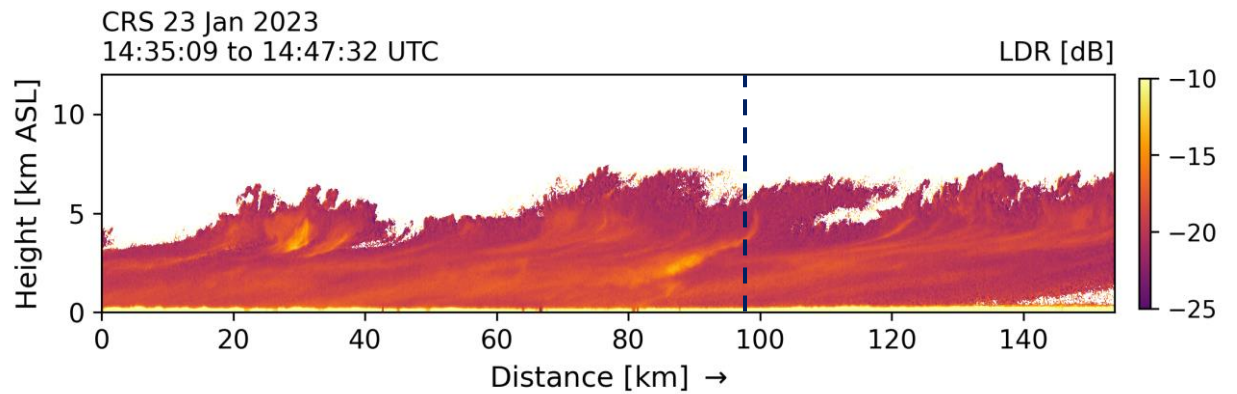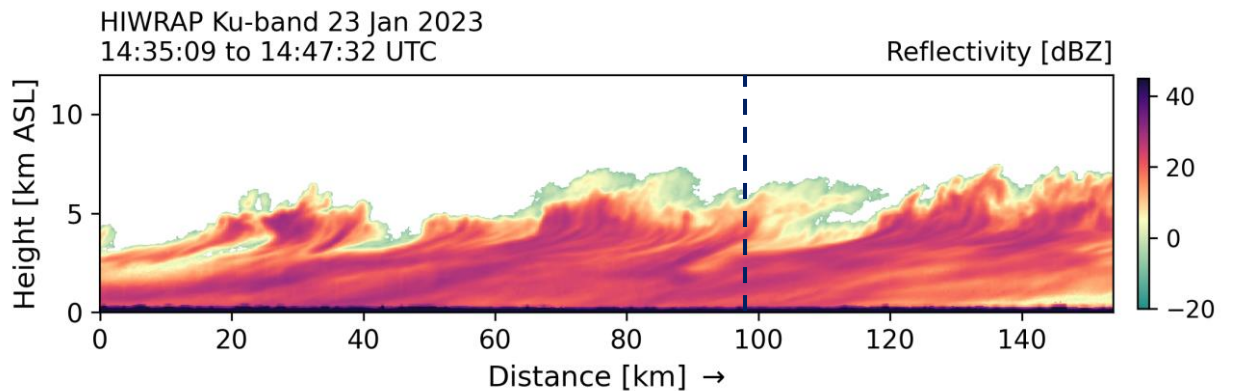



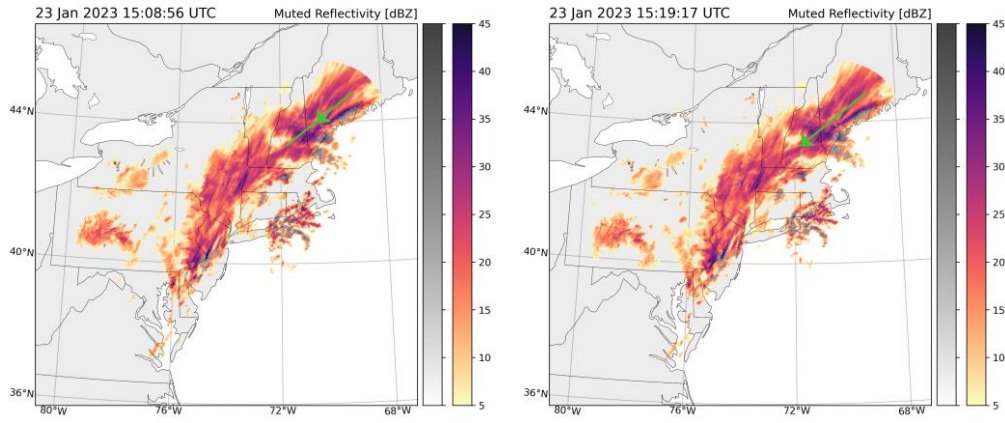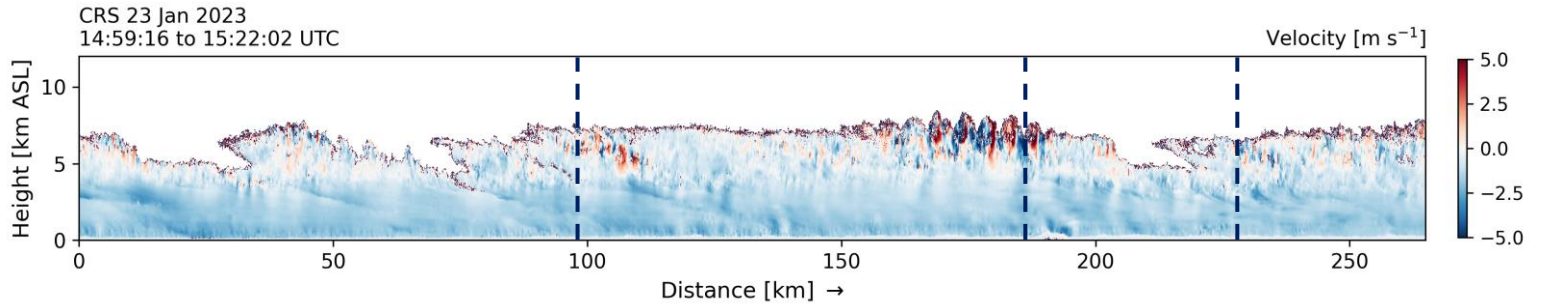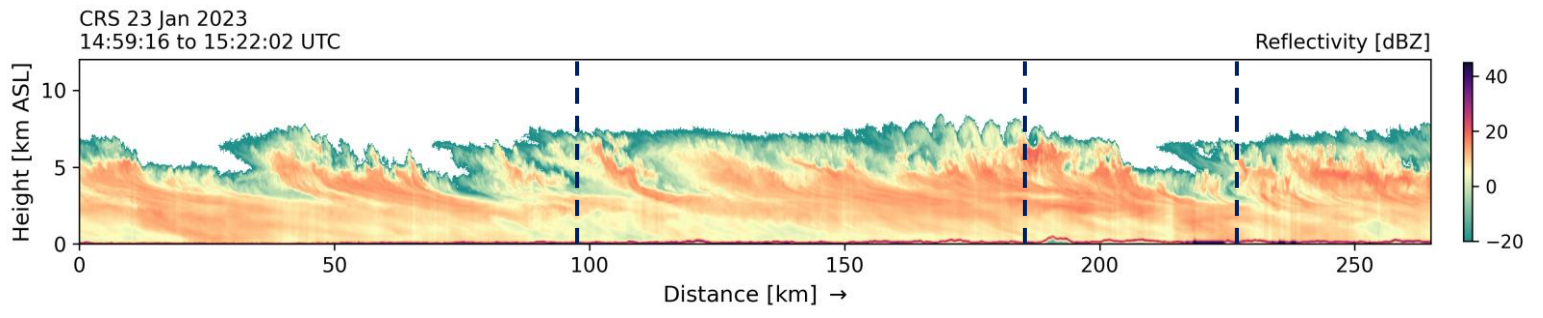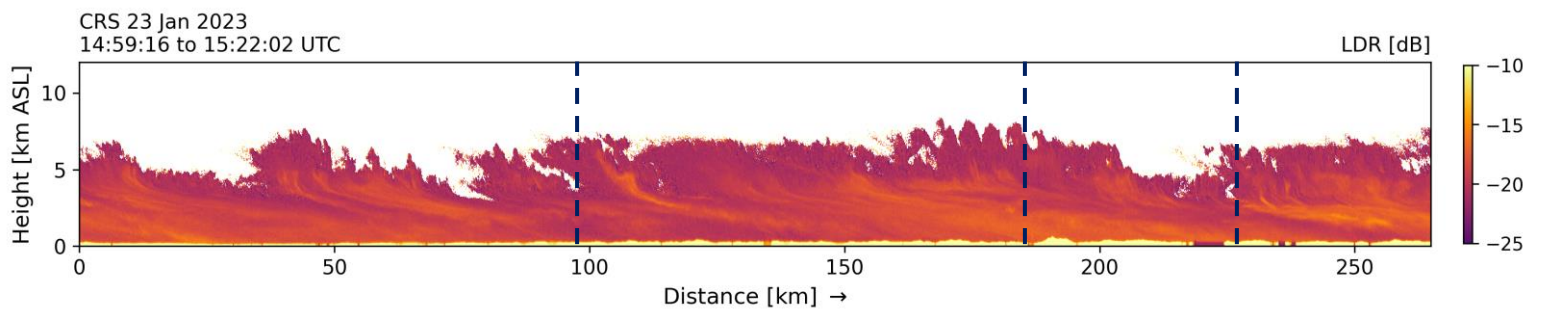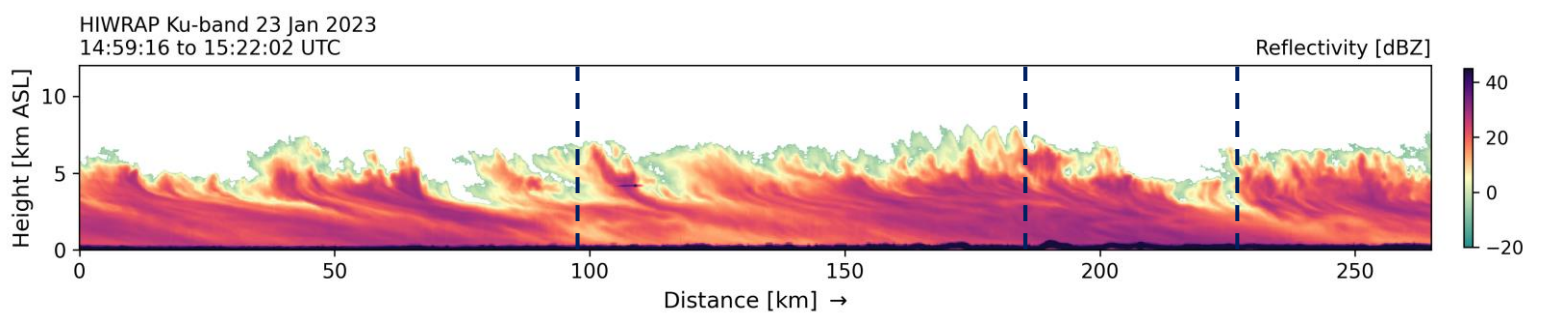

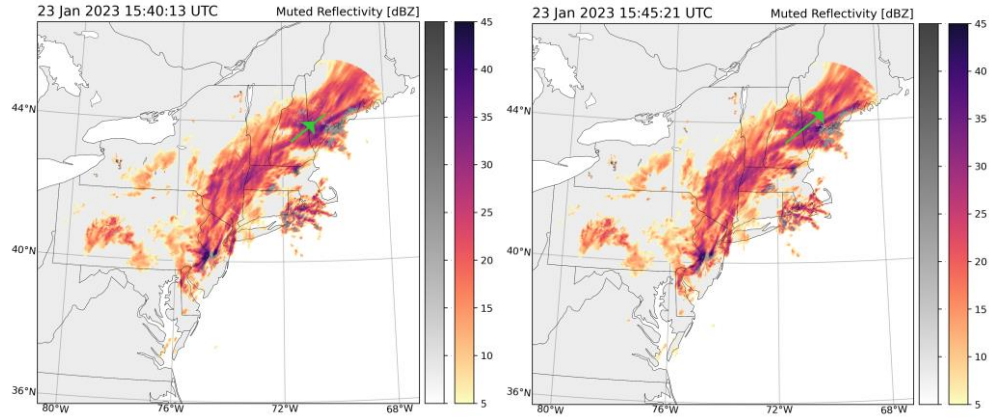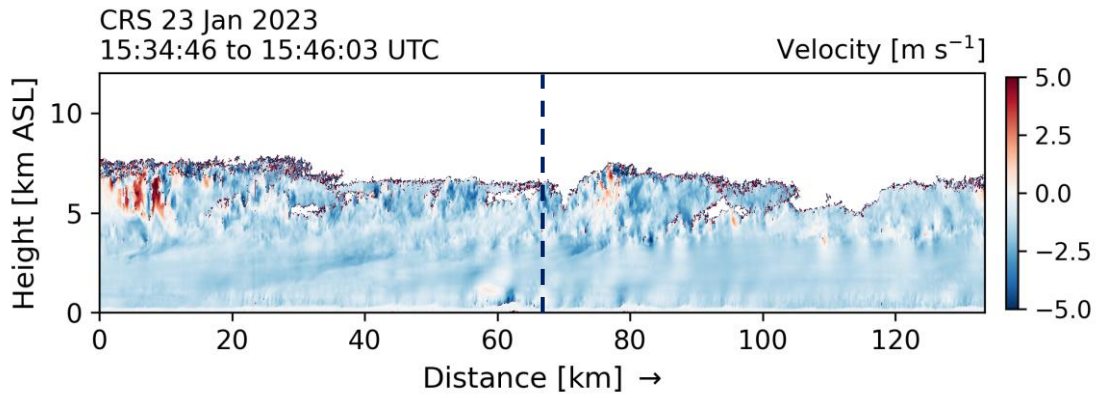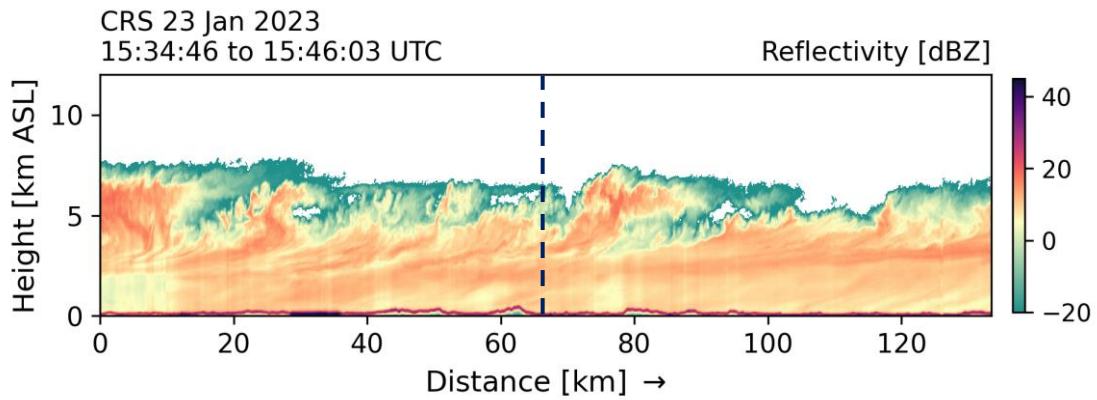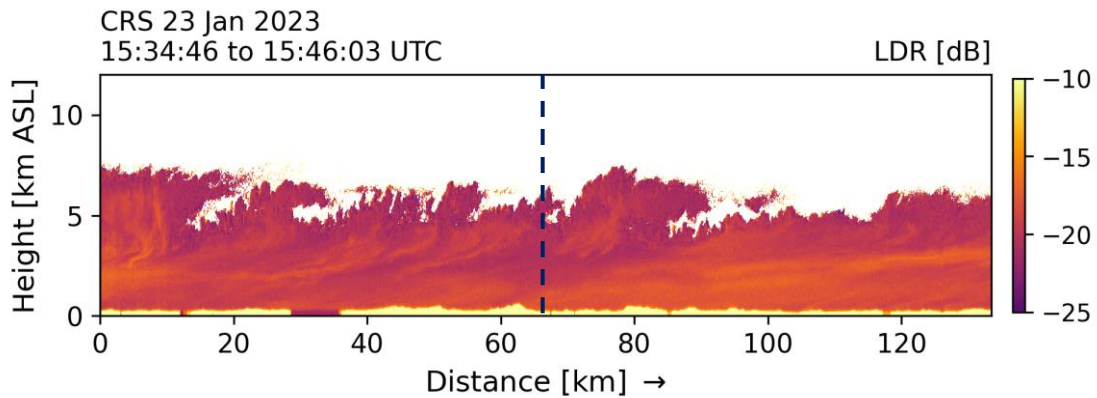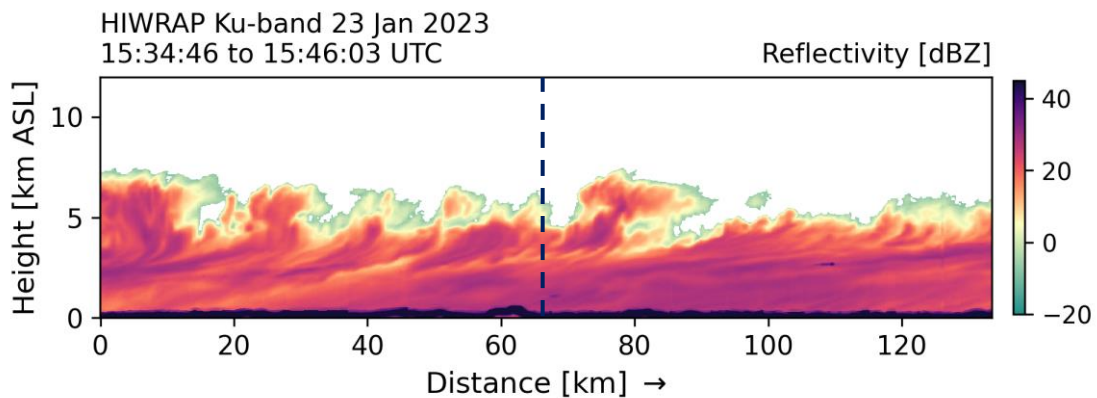



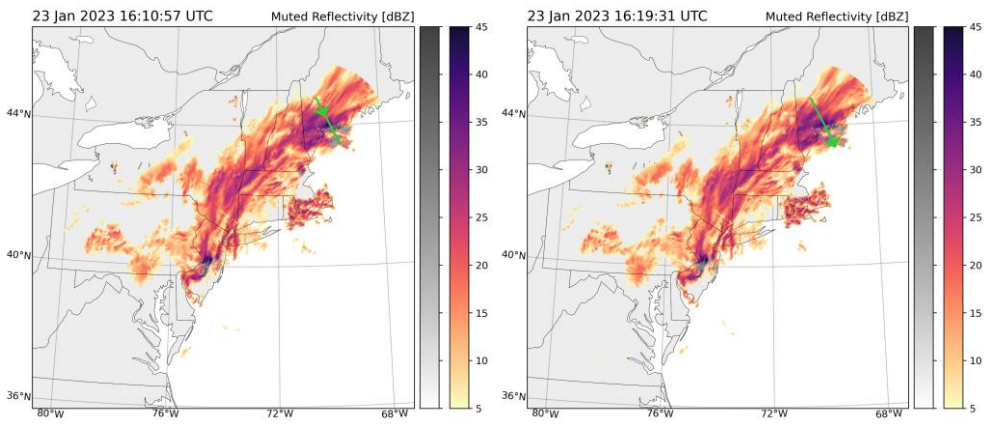

CRS 23 Jan 2023  
16:08:20 to 16:21:00 UTC

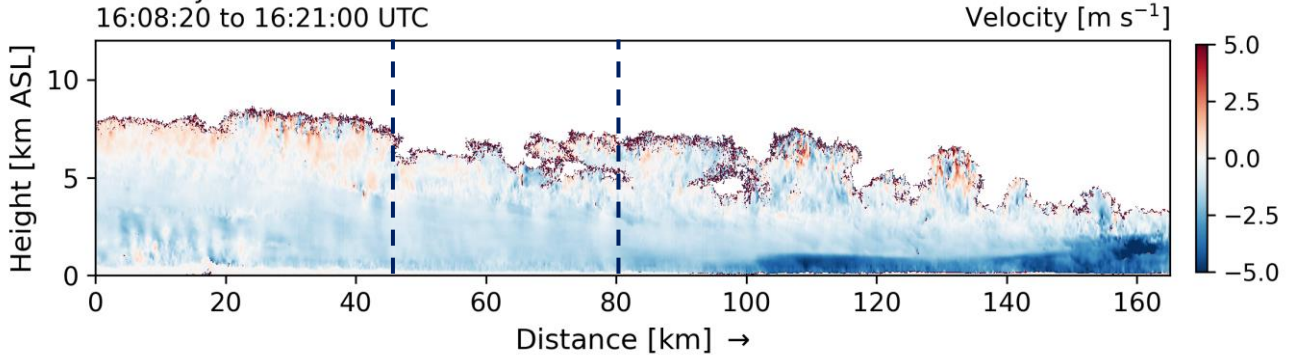

CRS 23 Jan 2023  
16:08:20 to 16:21:00 UTC

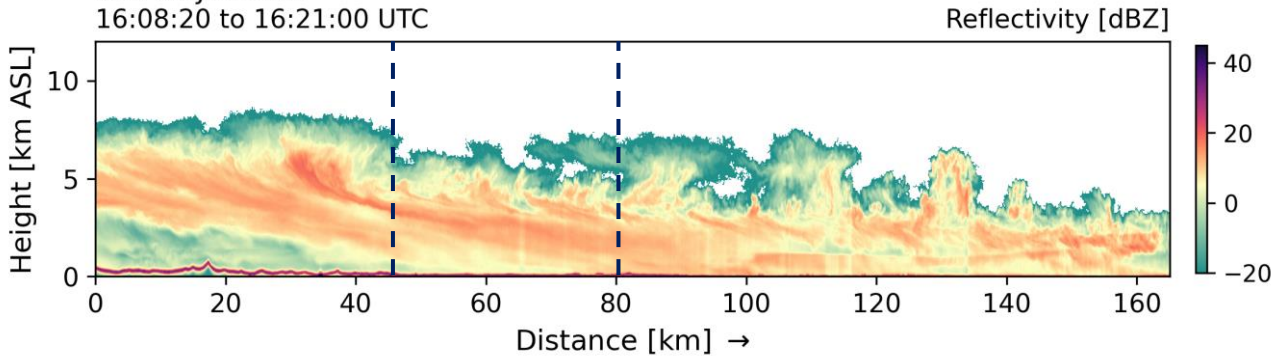

CRS 23 Jan 2023  
16:08:20 to 16:21:00 UTC

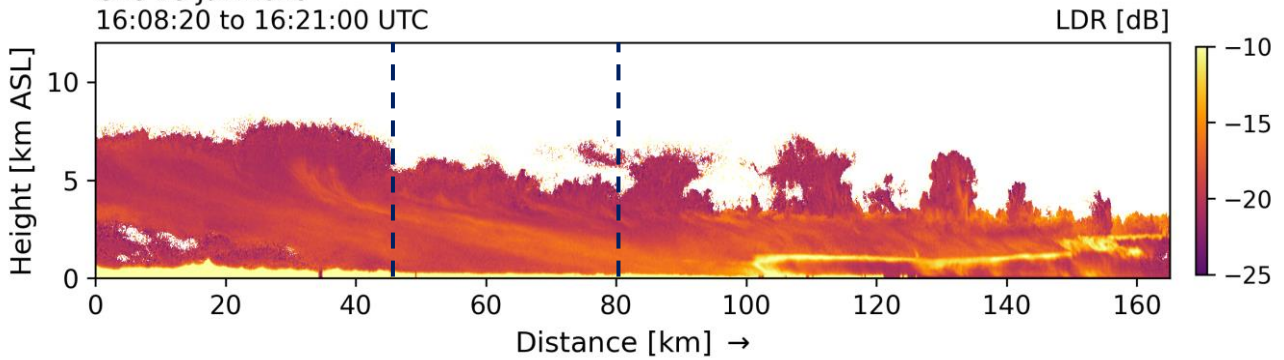

HIWRAP Ku-band 23 Jan 2023  
16:08:20 to 16:21:00 UTC

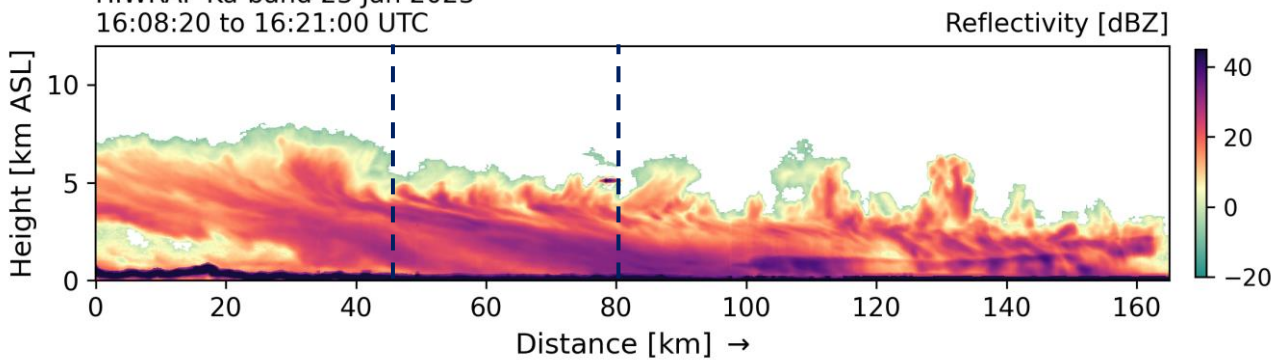



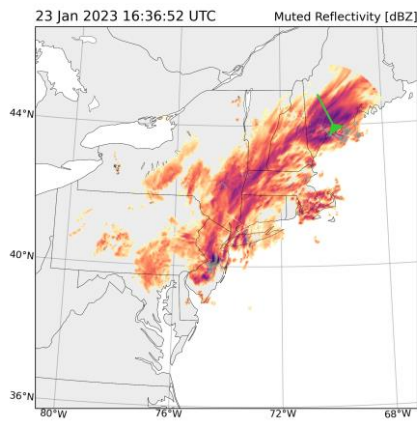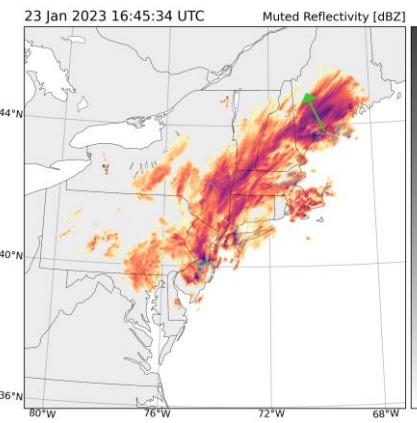

CRS 23 Jan 2023  
16:37:14 to 16:47:32 UTC

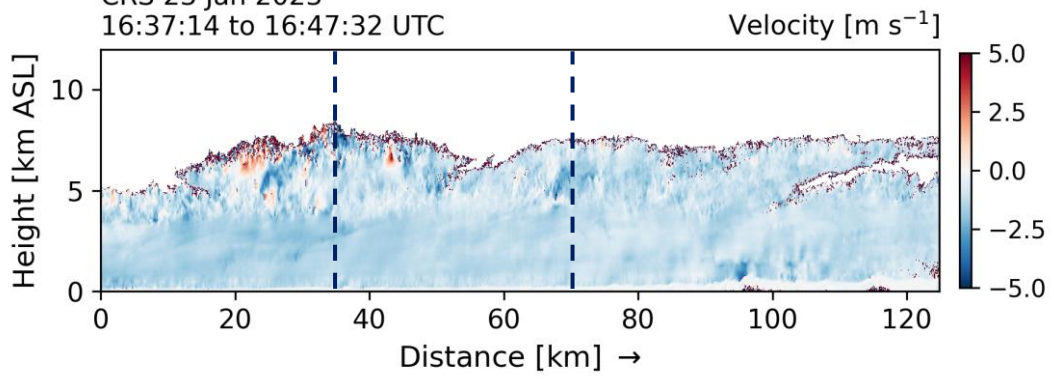

CRS 23 Jan 2023  
16:37:14 to 16:47:32 UTC

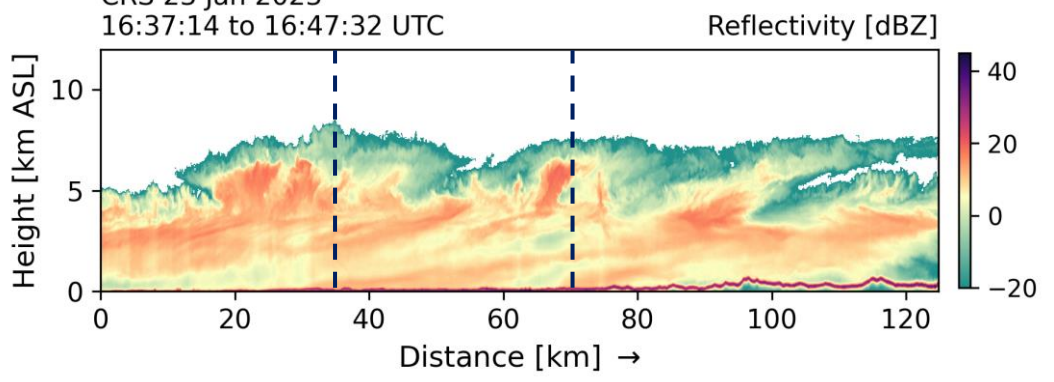

CRS 23 Jan 2023  
16:37:14 to 16:47:32 UTC

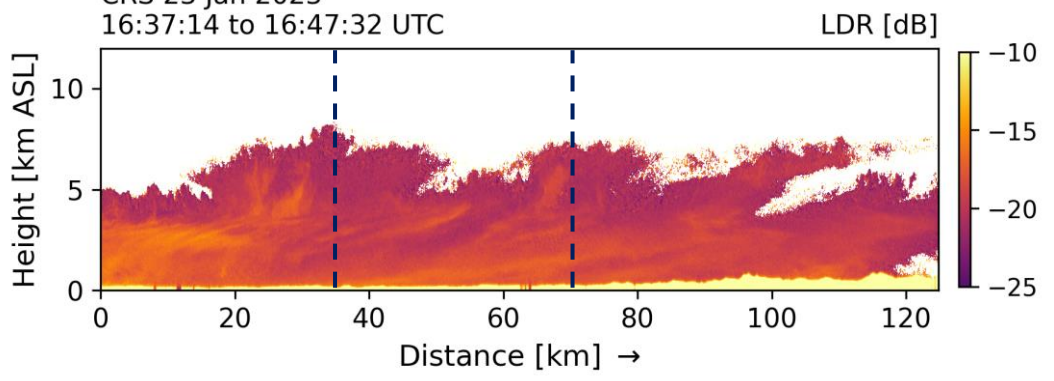

HIWRAP Ku-band 23 Jan 2023  
16:37:14 to 16:47:32 UTC

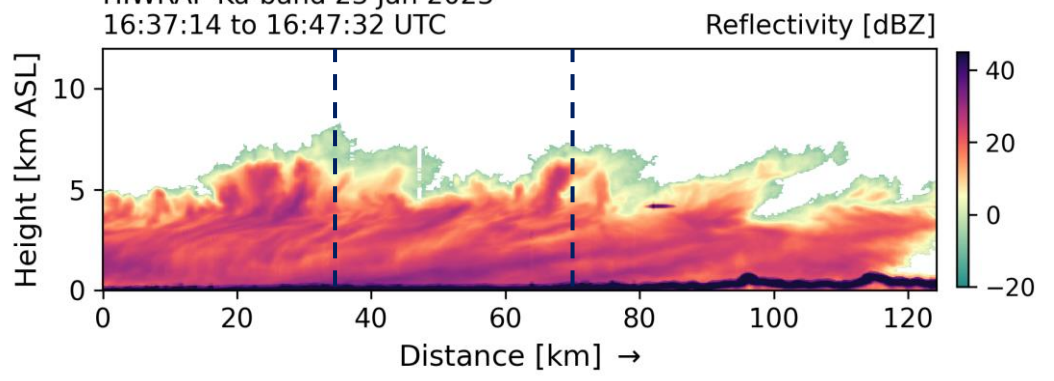

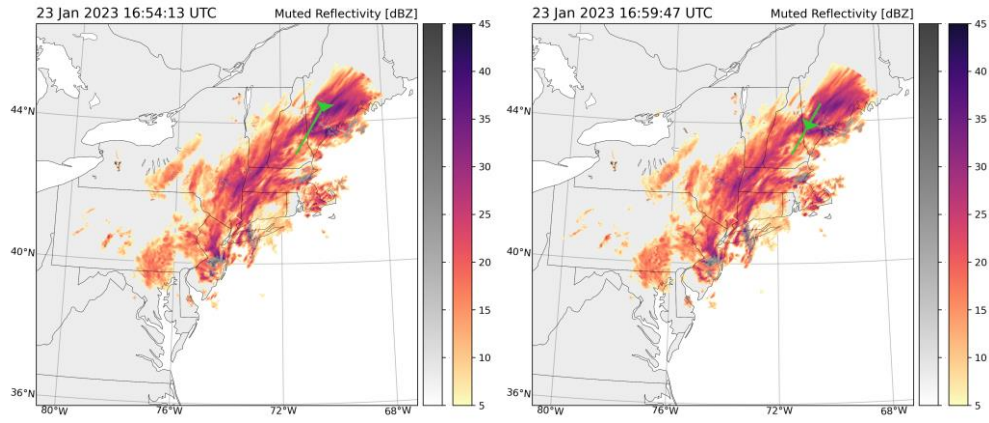

CRS 23 Jan 2023  
16:54:44 to 17:09:27 UTC

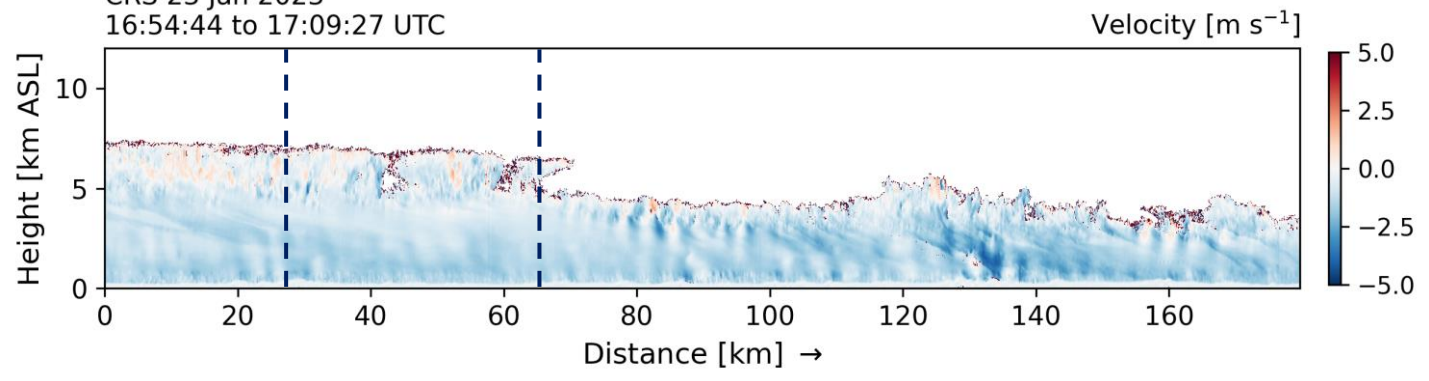

CRS 23 Jan 2023  
16:54:44 to 17:09:27 UTC

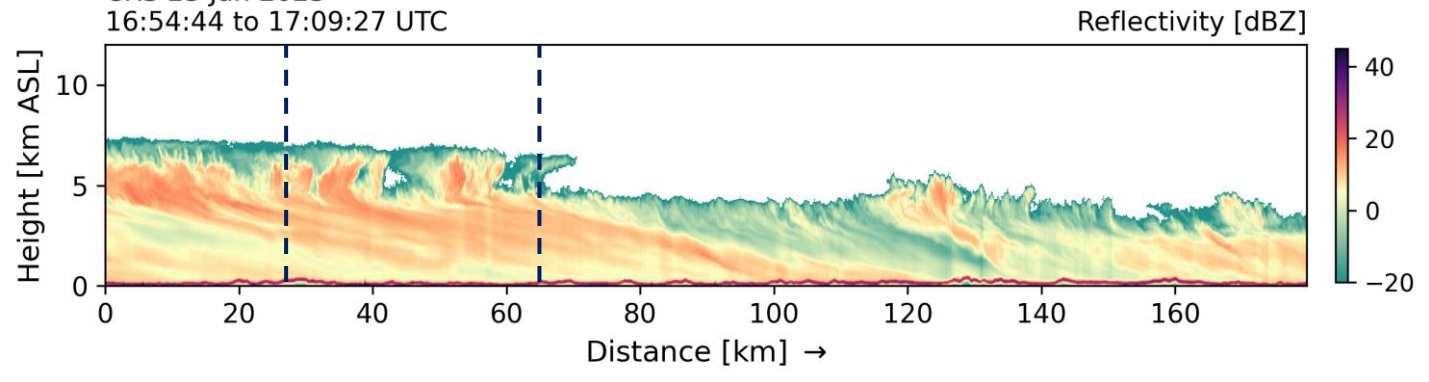

CRS 23 Jan 2023  
16:54:44 to 17:09:27 UTC

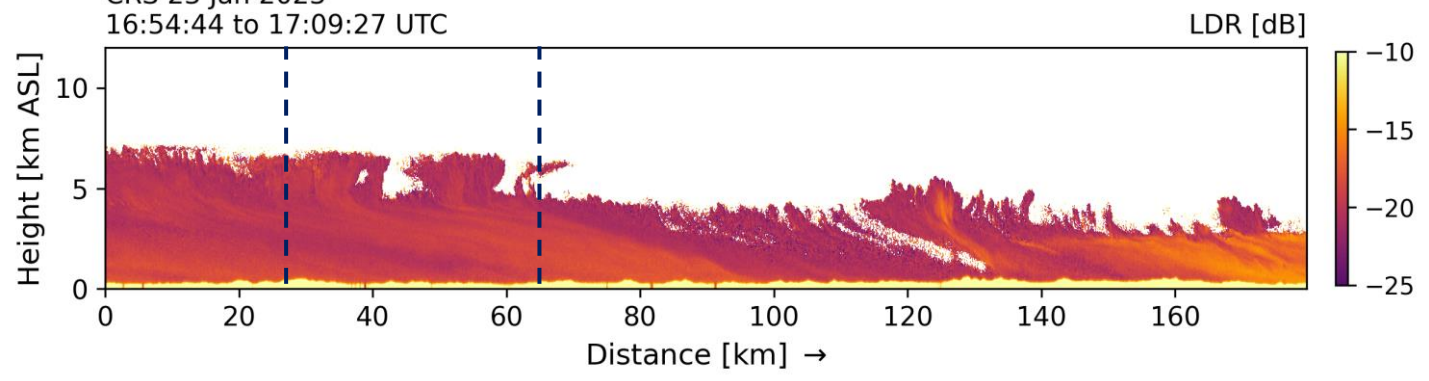

HIWRAP Ku-band 23 Jan 2023  
16:54:44 to 17:09:27 UTC

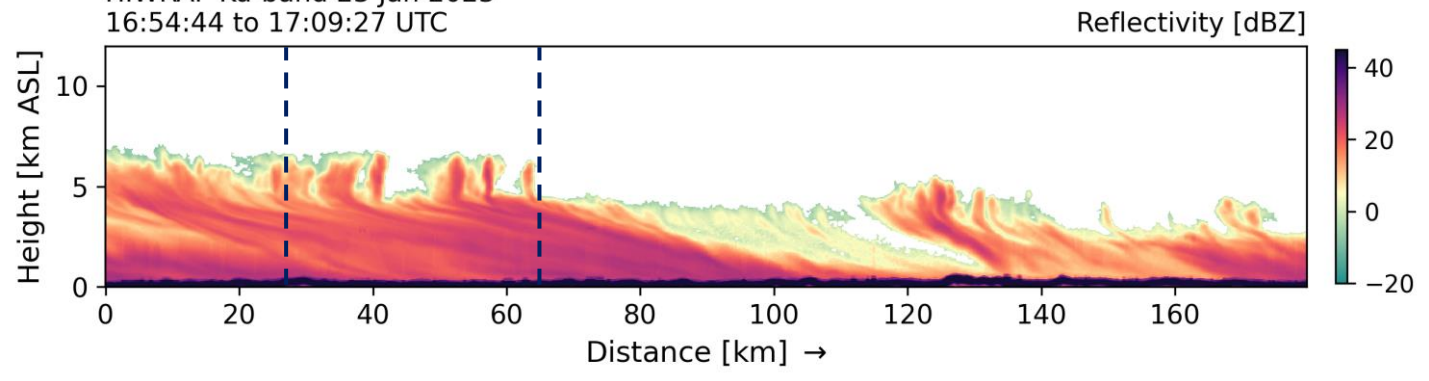



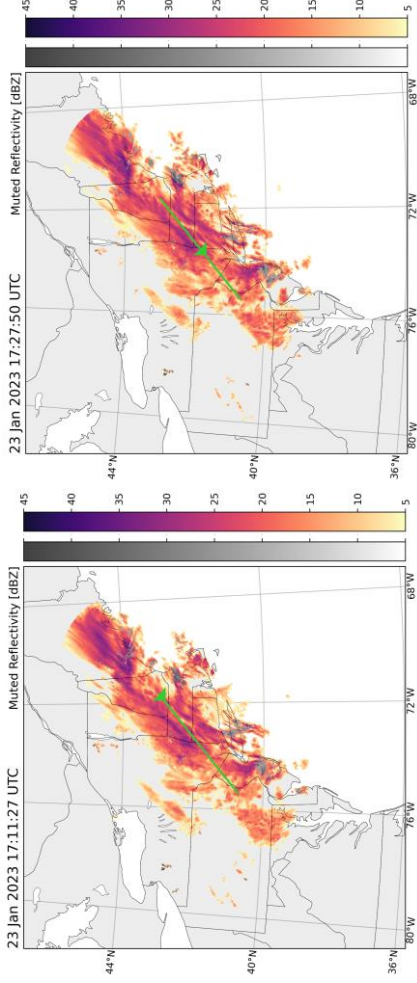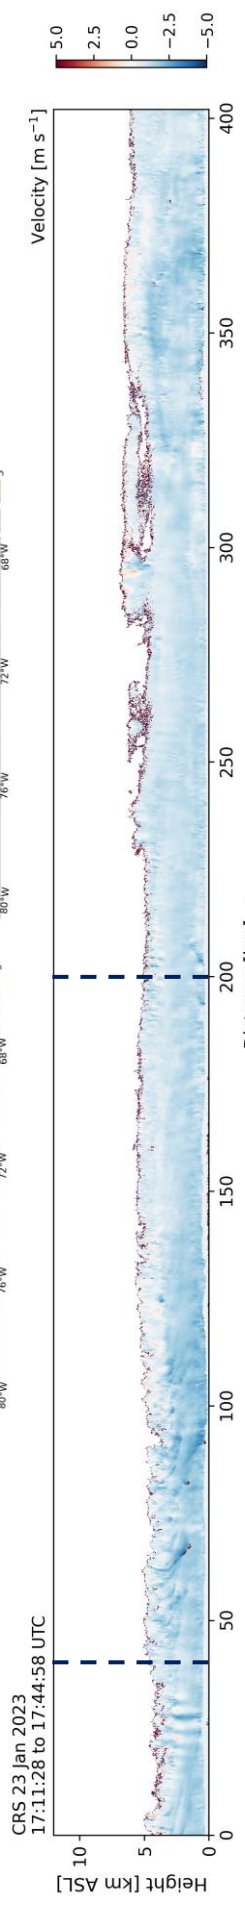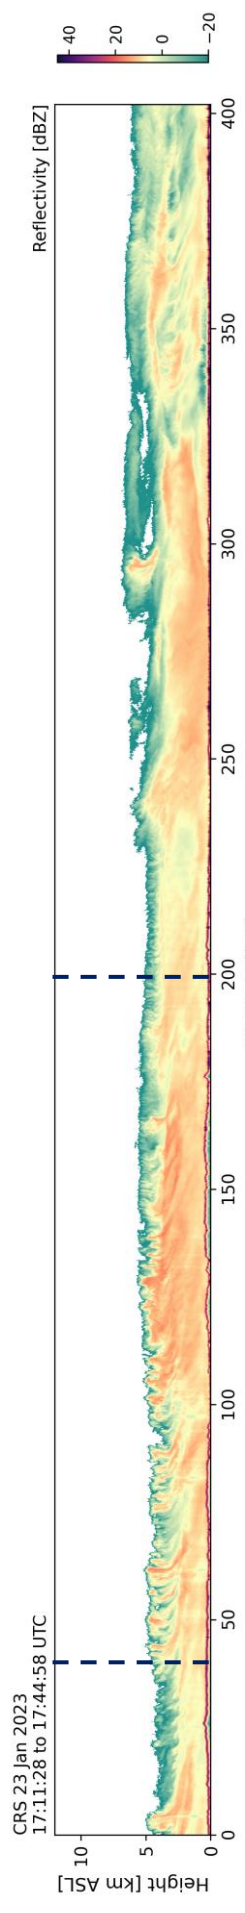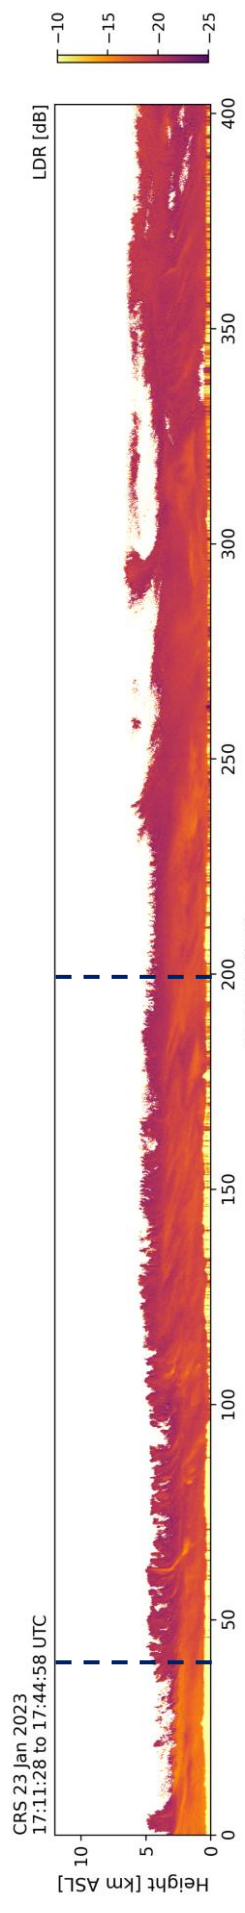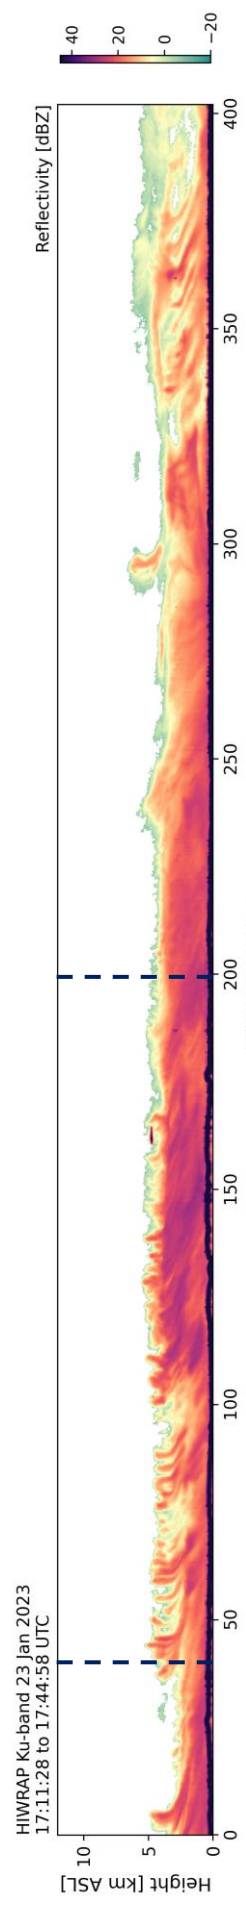



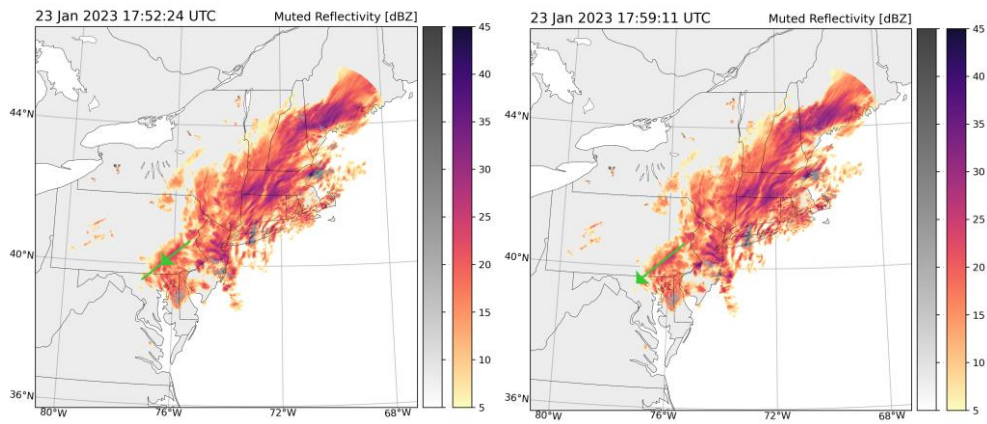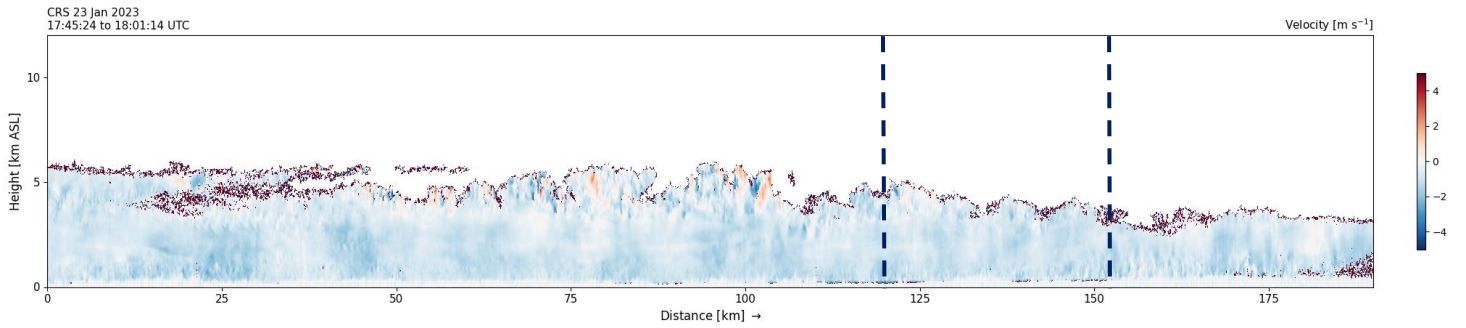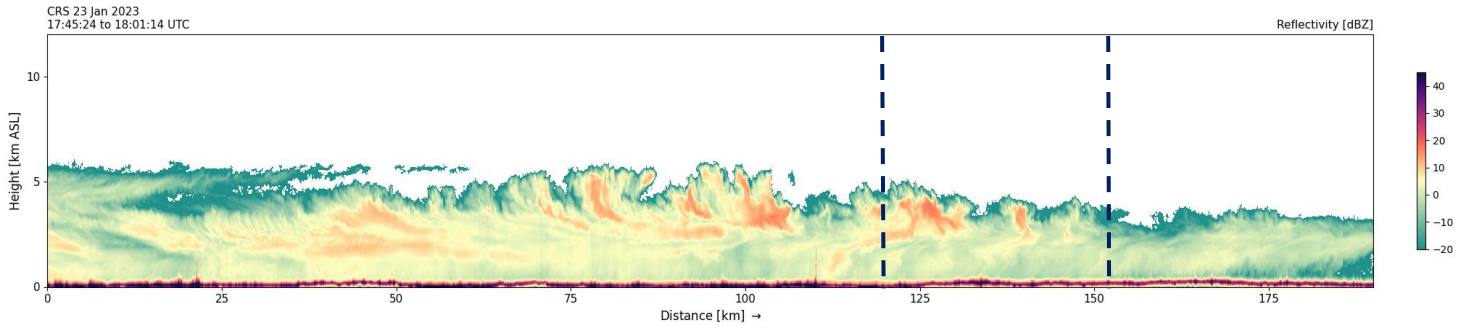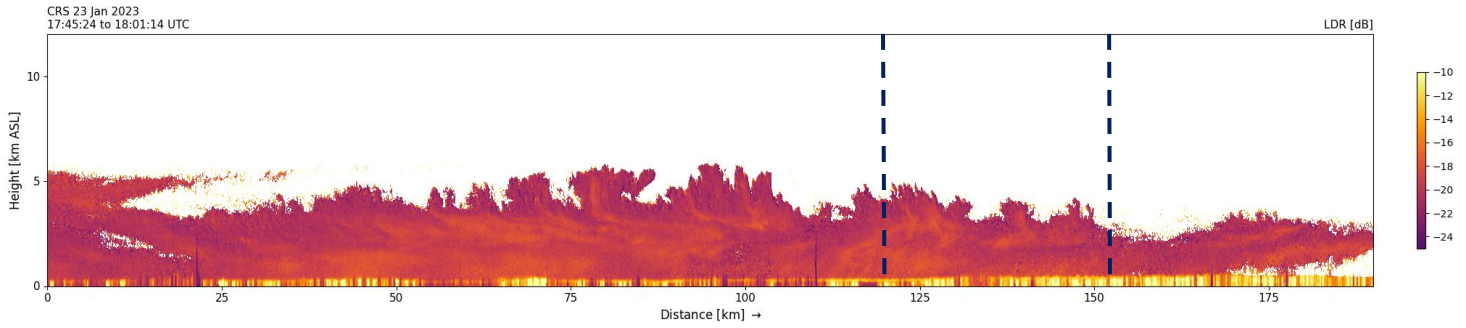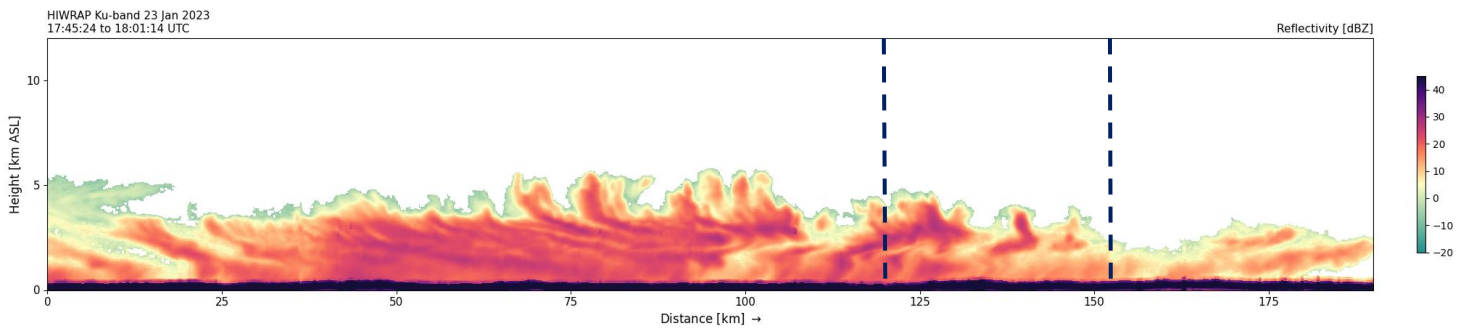

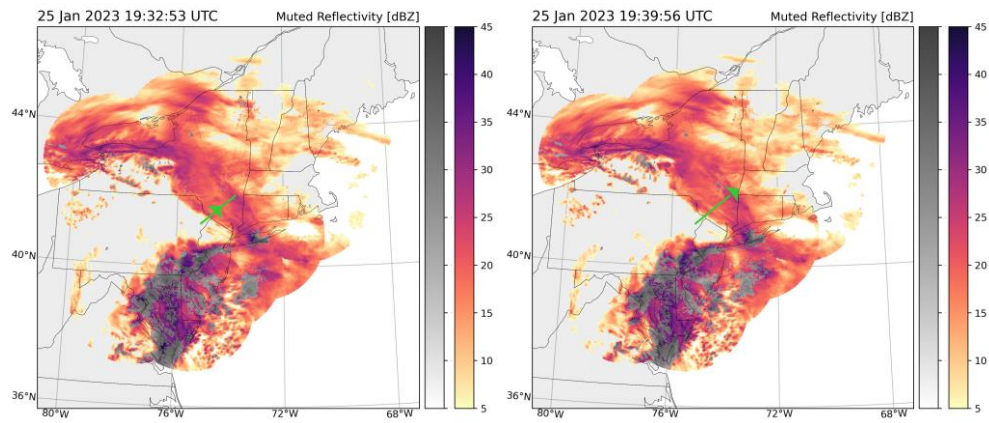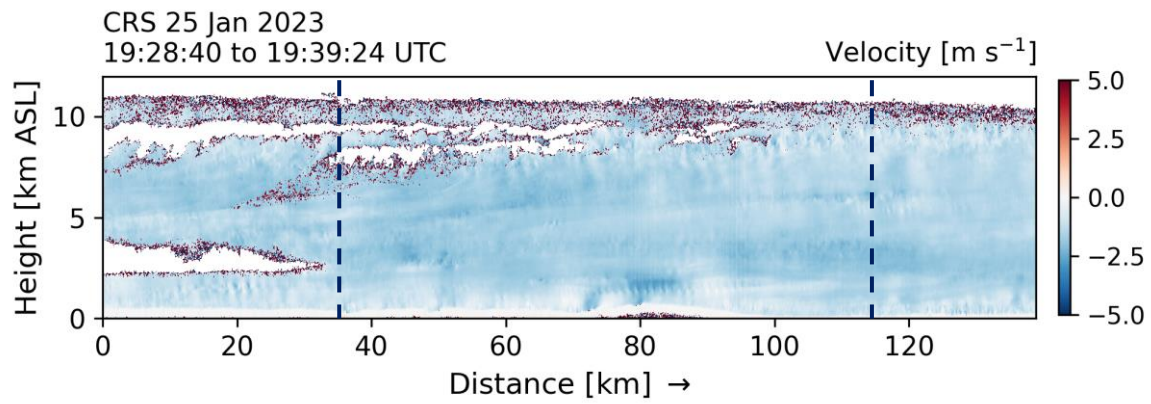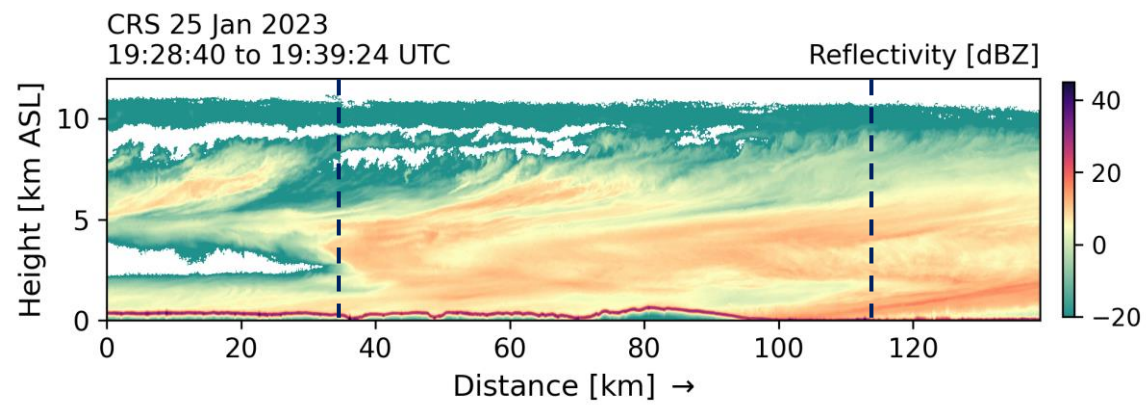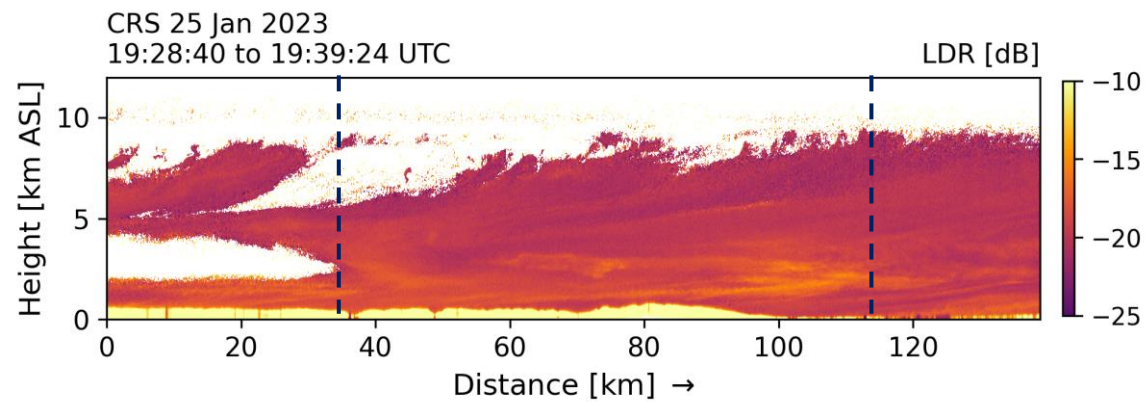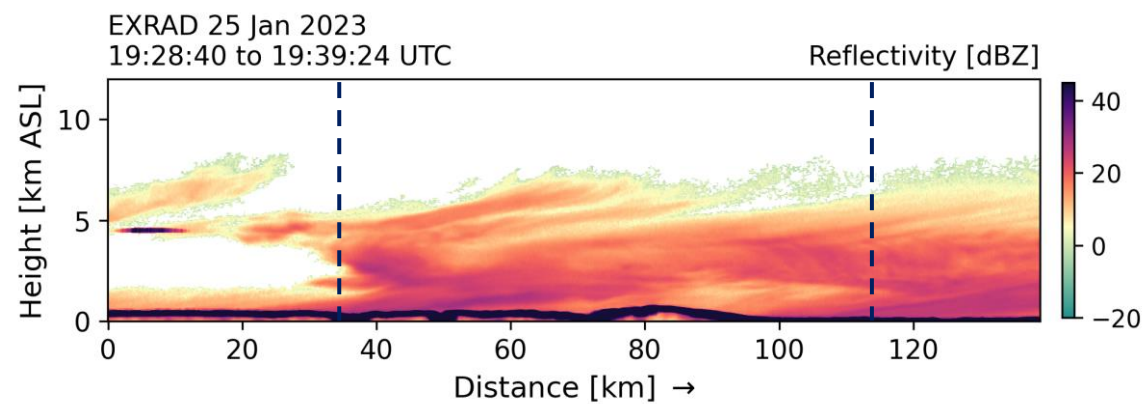



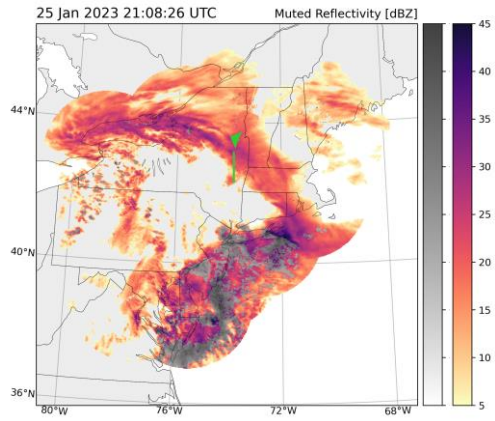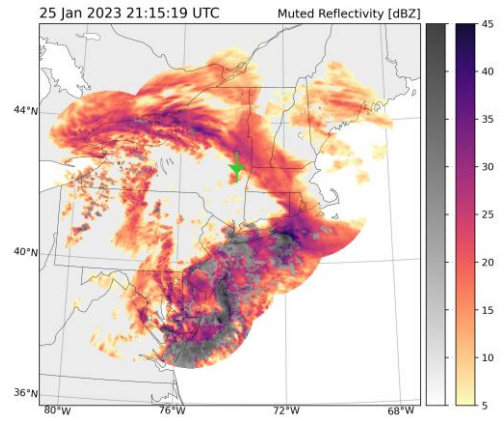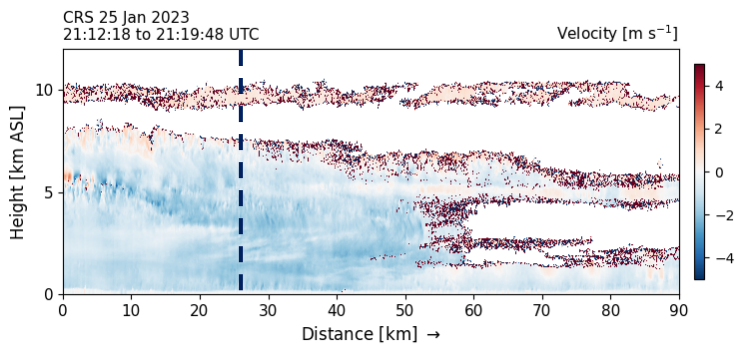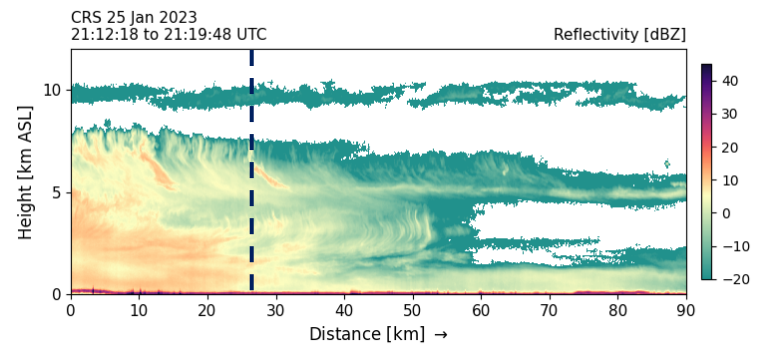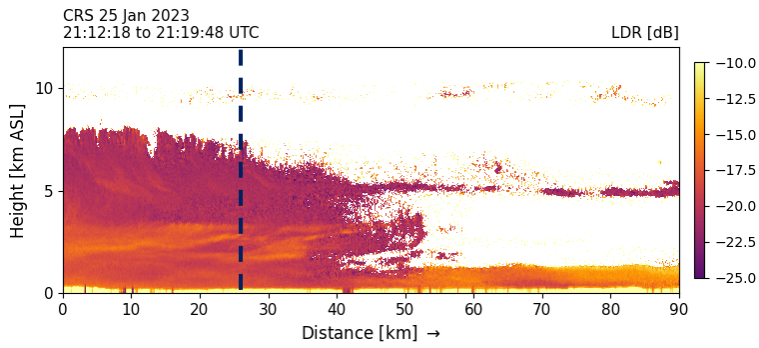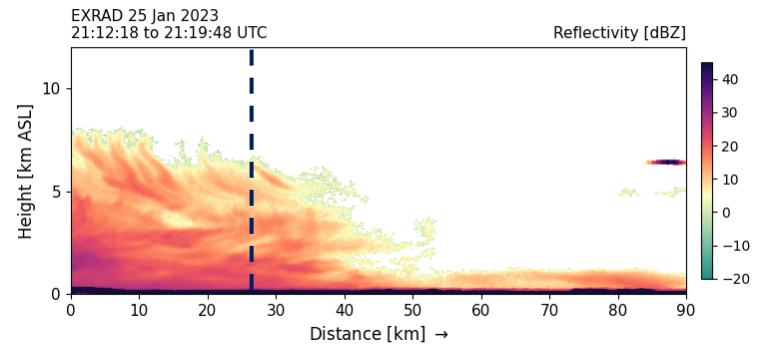



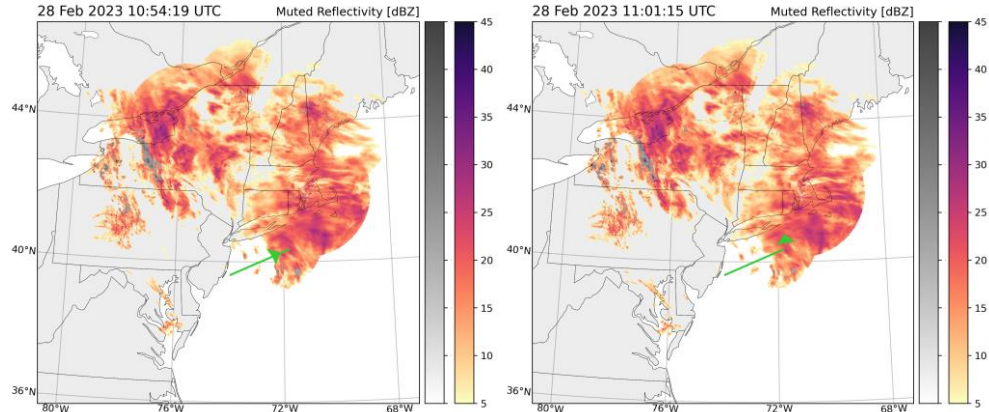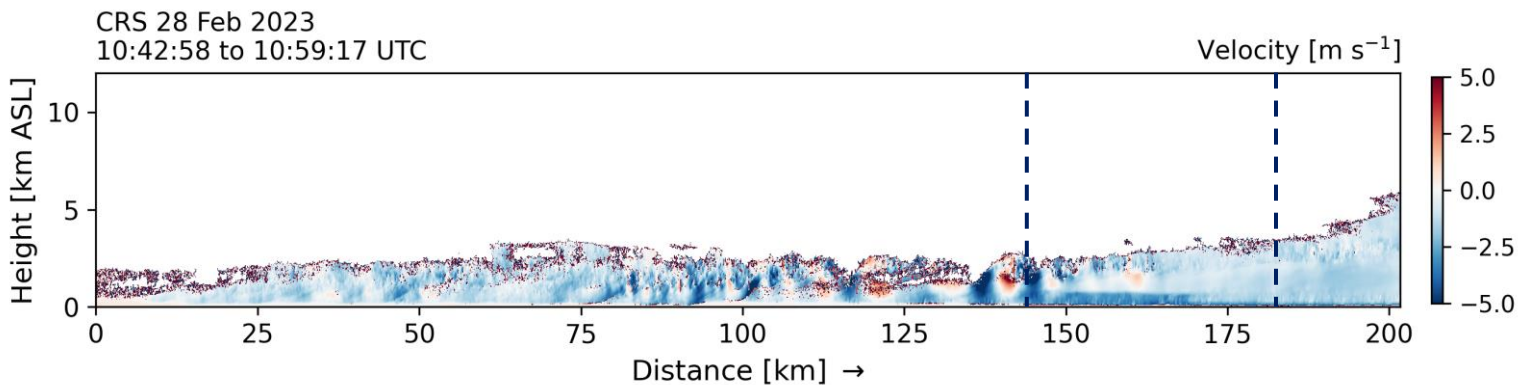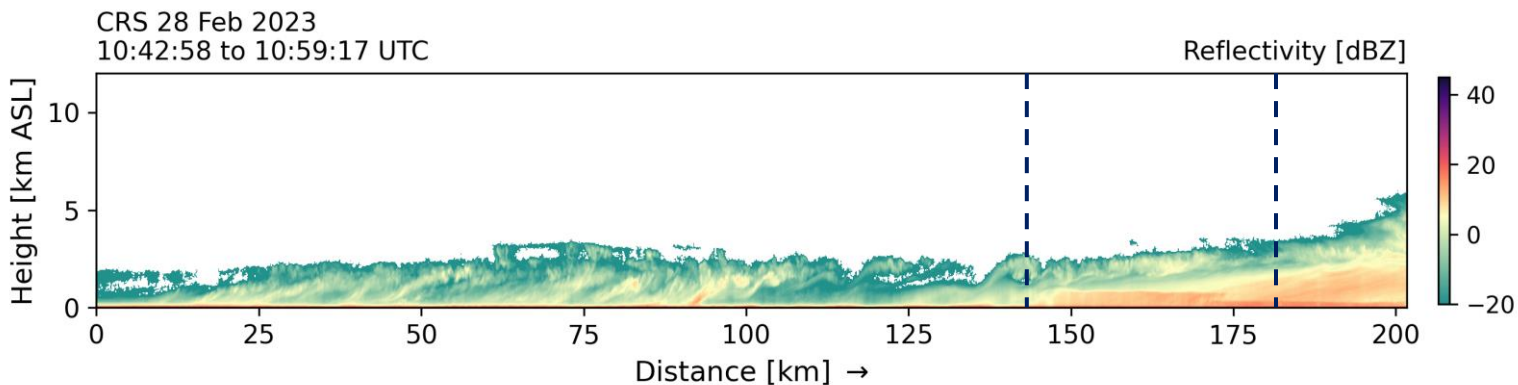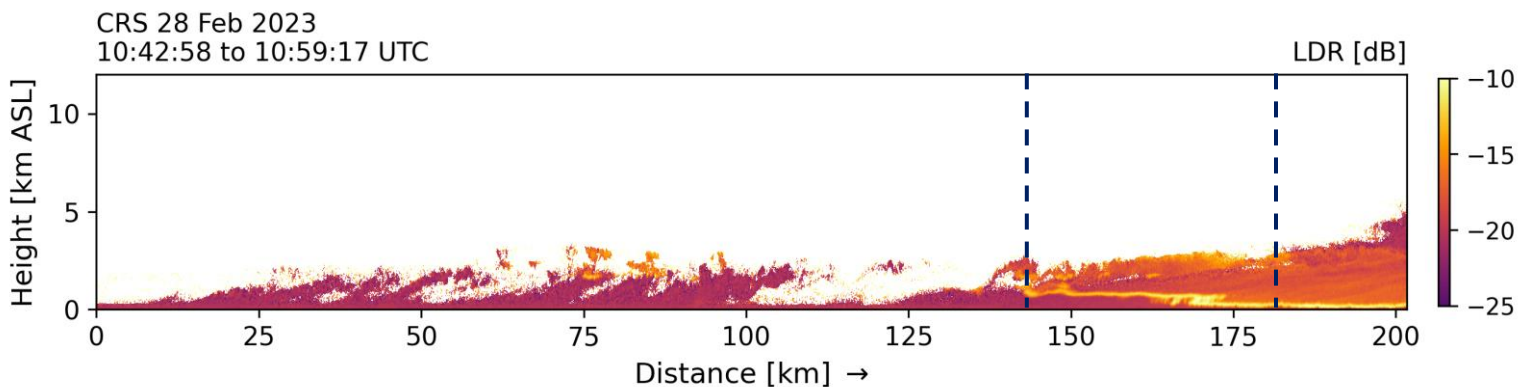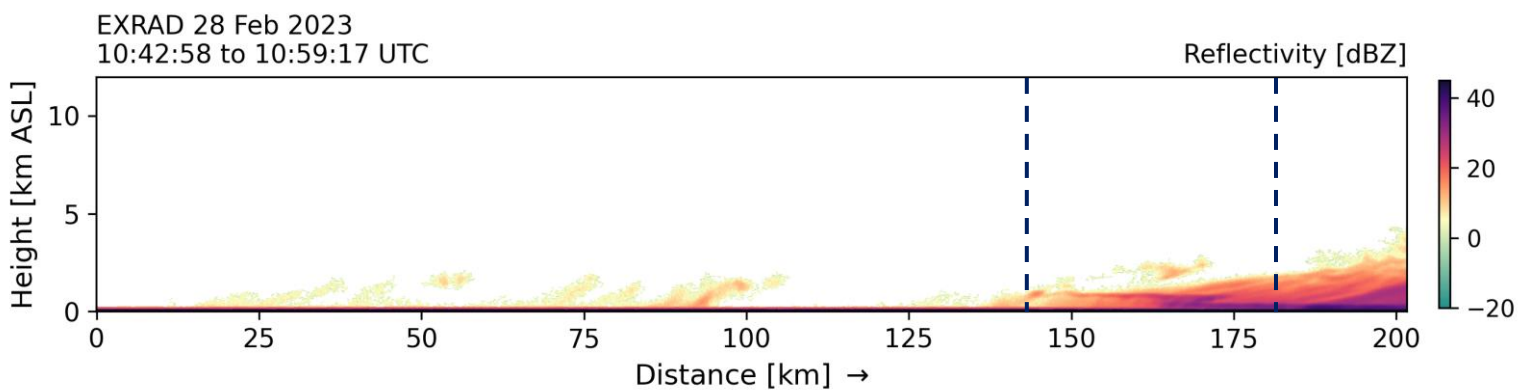

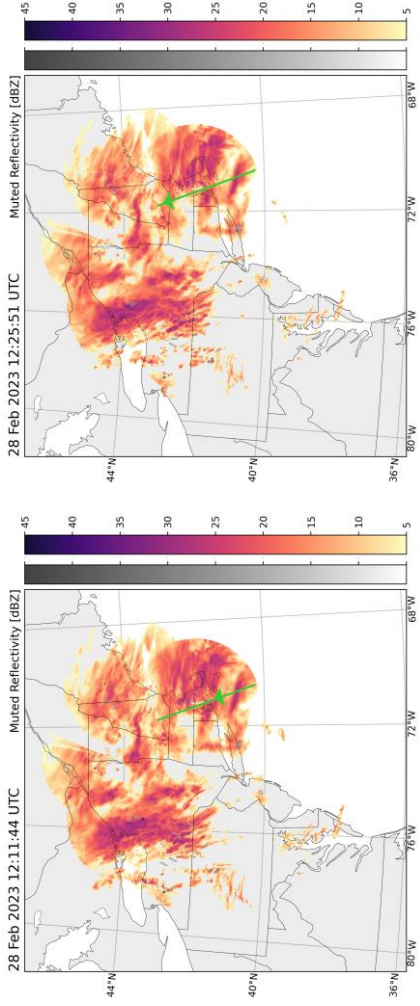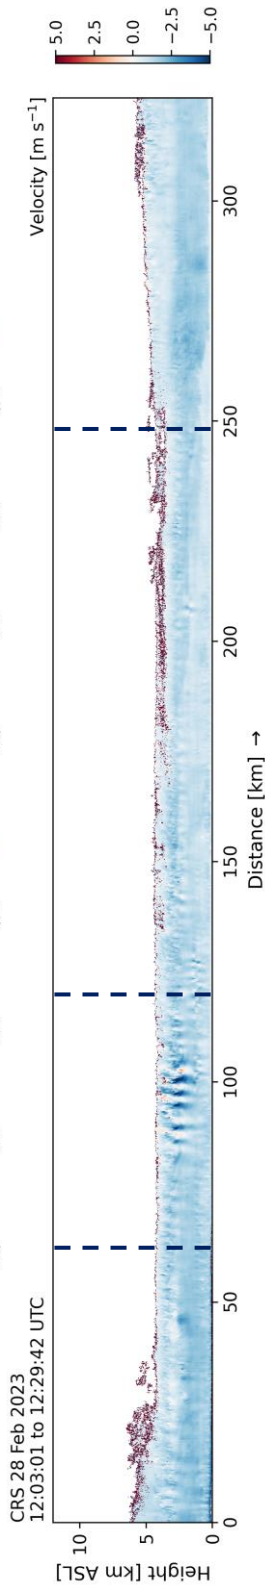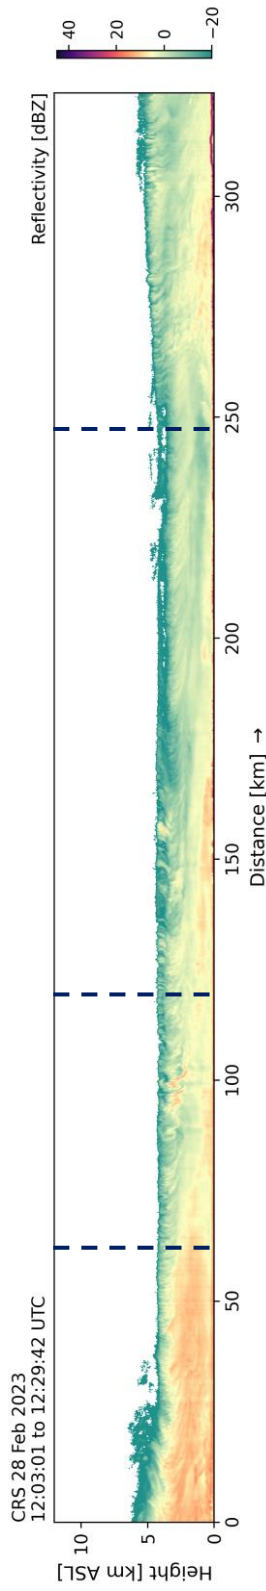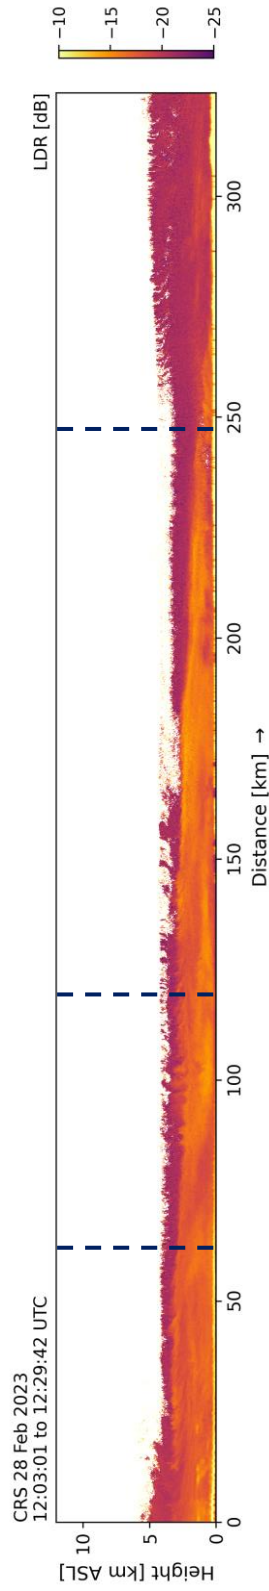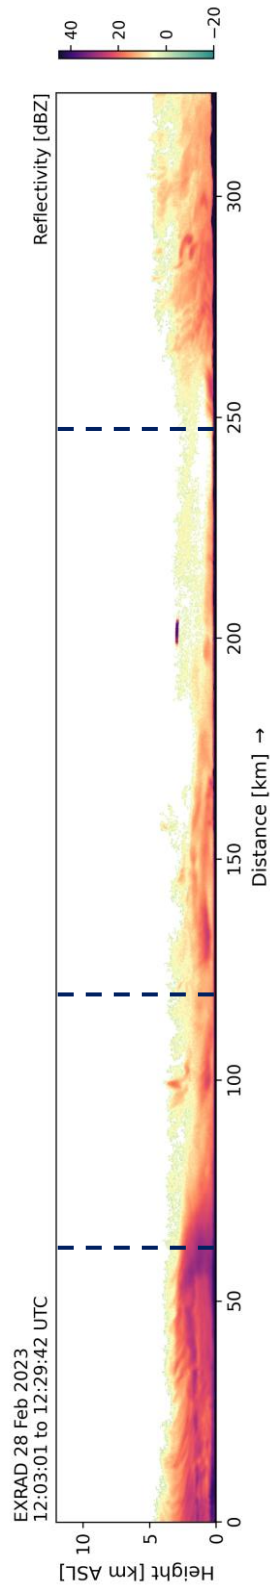



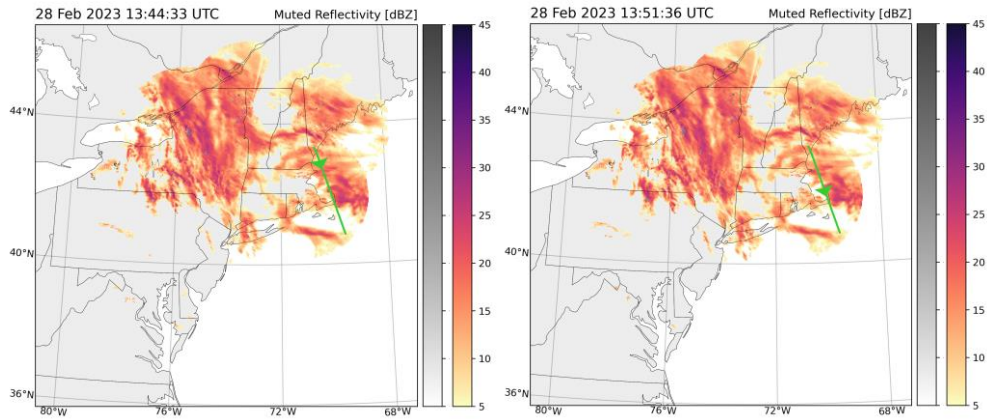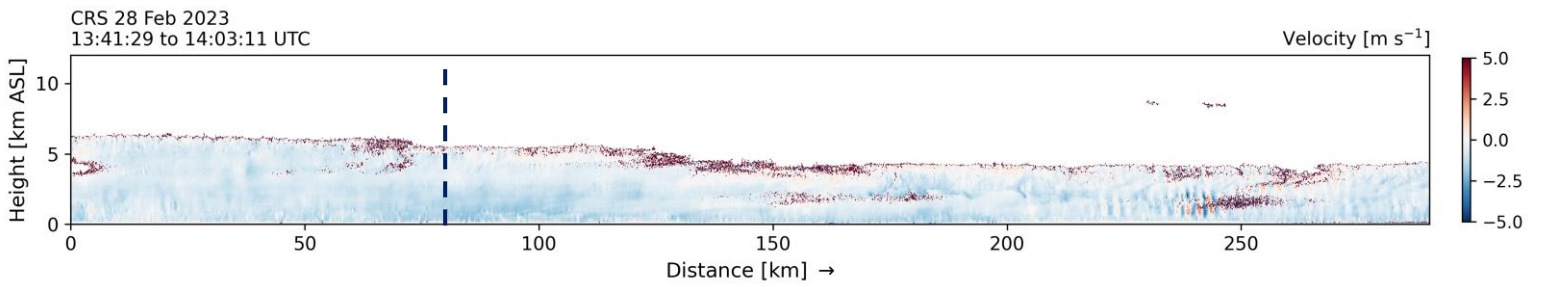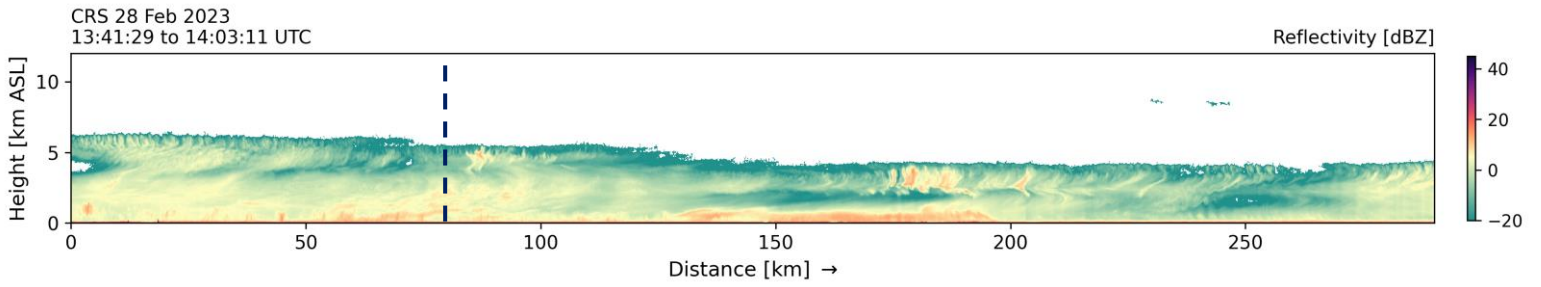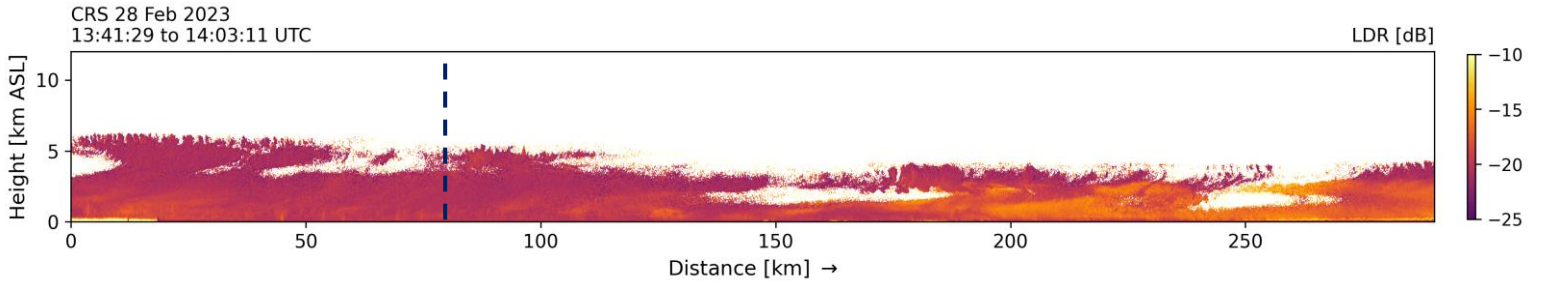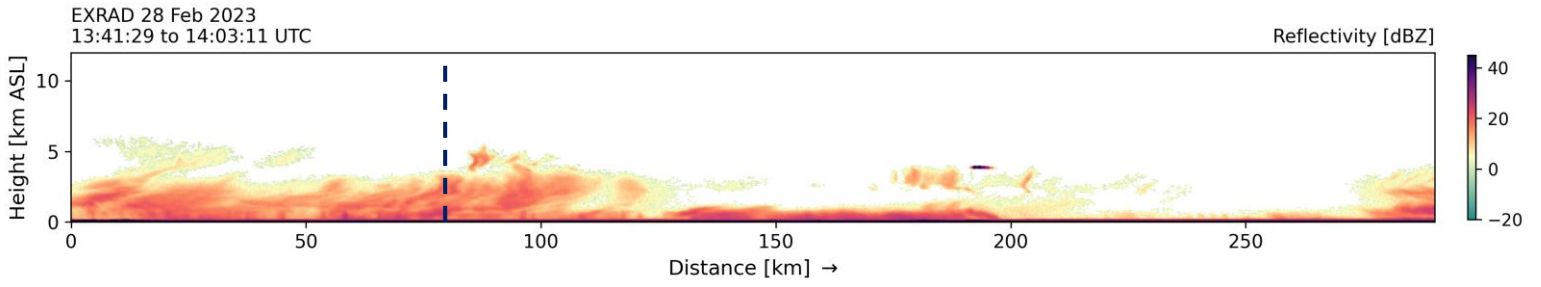

Supplement: Supplementary file 1 [file egusphere-2025-6-supplement.pdf]
